# Supplementary material
Source: publisher figshare collection journal article supplement (https://gsapubs.figshare.com/ndownloader/files/23316539)
Supplement: Supplementary file 1 [file 23316539]

## Sheet: Sheet1
Sample: L1				Isotopic ratios								Isotopic ages (Ma)
Grain #	[U] ppm	U/Th	207/235	2σ error	206/238	2σ error	RHO	207/235	2σ error	206/238	2σ error	207/206	2σ error	Best age	2σ error	% Discordance*	Rim/Core	shape
L1-2	822	1.89	0.487	0.013	0.0642	0.0013	0.62454	403	8.5	401.1	7.9	390	47	401.1	7.9	0.471464
L1-3	474	0.894	0.798	0.021	0.0956	0.0021	0.57872	597	13	588	12	615	50	588	12	1.50754
L1-5	240	1.221	0.826	0.022	0.0983	0.0015	0.39783	609	12	604.4	8.6	602	55	604.4	8.6	0.755337
L1-7	140.9	1.058	1.266	0.041	0.1387	0.0029	0.47458	831	18	837	16	806	57	837	16	0.722022
L1-9	164.8	0.9	0.773	0.029	0.0952	0.0023	0.42447	580	17	586	13	530	72	586	13	1.03448
L1-10	131.4	3.95	0.525	0.028	0.0689	0.0021	0.17598	426	19	429	13	390	110	429	13	0.704225
L1-12	327.1	2.161	6.576	0.09	0.3704	0.0052	0.61694	2054	12	2030	24	2070	22	2070	22	1.93237
L1-13	132.2	0.86	0.725	0.034	0.0888	0.002	0.38046	550	20	548	12	512	97	548	12	0.363636
L1-14	565	0.465	1.385	0.039	0.1371	0.0036	0.67261	880	17	828	21	1025	48	828	21	5.90909
L1-16	376	4	0.49	0.014	0.0642	0.001	0.36077	404.6	9.7	400.9	6.1	397	60	400.9	6.1	0.914483
L1-17	463	2.489	3.678	0.086	0.2714	0.008	0.36779	1564	19	1556	44	1575	64	1575	64	1.20635
L1-19	334	3.44	0.884	0.029	0.1044	0.0034	0.58011	640	16	639	20	584	65	639	20	0.15625
L1-21	462	1.94	5.38	0.2	0.293	0.011	0.56294	1875	31	1654	55	2117	63	2117	63	21.8706
L1-22	591	8.75	0.892	0.045	0.1048	0.0038	0.72467	645	24	642	22	629	74	642	22	0.465116
L1-23	467	0.81	0.826	0.053	0.0991	0.0023	0.25208	609	30	609	13	570	140	609	13	0
L1-24	305	1.563	0.615	0.02	0.0759	0.0014	0.27018	484	12	471.5	8.4	497	69	471.5	8.4	2.58264
L1-25	496	2.07	0.598	0.015	0.0768	0.0015	0.33611	474.8	9.6	476.8	8.9	437	58	476.8	8.9	0.42123		euhedral
L1-27	477	1.792	0.793	0.024	0.0951	0.0023	0.49039	590	14	585	14	592	60	585	14	0.847458
L1-28	231	1.84	0.827	0.031	0.1016	0.0023	0.36998	607	17	623	13	510	77	623	13	2.63591
L1-29	215.4	1.432	11.71	0.24	0.4875	0.0085	0.69658	2578	19	2557	37	2577	25	2577	25	0.776096
L1-30	491	7.38	0.921	0.035	0.1019	0.0037	0.66888	665	20	625	22	779	65	625	22	6.01504
L1-32	385	0.734	0.7	0.033	0.0857	0.0028	0.23013	537	19	530	17	540	110	530	17	1.30354
L1-33	121	0.736	0.824	0.037	0.0974	0.0022	0.30483	603	21	599	13	568	97	599	13	0.66335
L1-36a	481	1.67	0.802	0.024	0.0962	0.002	0.51474	596	13	592	12	591	55	592	12	0.671141
L1-38a	387	1.203	0.505	0.013	0.06465	0.00092	0.34445	415.3	8.6	403.8	5.6	444	55	403.8	5.6	2.76908		euhedral
L1-39a	103.7	2.8	0.821	0.043	0.0986	0.0029	0.35187	600	24	606	17	550	110	606	17	1
L1-41a	177	1.108	0.8	0.035	0.0949	0.0037	0.39198	594	20	583	22	646	94	583	22	1.85185
L1-42a	486	2.31	1.034	0.04	0.1171	0.0036	0.49836	719	20	713	21	717	78	713	21	0.834492
L1-43a	1910	6.72	0.323	0.036	0.0442	0.004	0.6607	283	27	279	25	310	150	279	25	1.41343	Rim
L1-43a	557	3.817	0.803	0.021	0.0972	0.0017	0.45848	597	12	598	10	572	53	598	10	0.167504	Core
L1-44a	188	0.598	5.39	0.13	0.3242	0.0063	0.54014	1877	21	1808	30	1948	39	1948	39	7.18686
L1-45a	201.7	2.52	3.6	0.12	0.2325	0.0075	0.44377	1546	26	1347	39	1823	63	1823	63	26.1108
L1-48a	268	1.84	0.757	0.052	0.0899	0.0065	0.63719	571	32	553	38	650	130	553	38	3.15236
L1-49a	370	1.86	0.721	0.032	0.0923	0.0023	0.50497	547	19	569	14	428	83	569	14	4.02194
L1-50a	248	0.703	0.788	0.047	0.0898	0.0057	0.51355	588	28	552	34	720	120	552	34	6.12245
L1-52a	148	1.07	0.889	0.038	0.1078	0.0022	0.13803	642	19	660	13	556	84	660	13	2.80374
L1-55a	78.7	1.854	0.43	0.041	0.052	0.0023	0.31032	357	28	327	14	500	180	327	14	8.40336
L1-56a	1650	9.06	0.92	0.023	0.1083	0.0021	0.48548	661	12	663	12	651	47	663	12	0.302572	Rim
L1-56a	169	2.04	1.651	0.071	0.1653	0.0044	0.55622	984	27	986	24	969	73	969	73	1.75439	Core
L1-57a	437	1.514	0.561	0.026	0.0682	0.0027	0.75194	448	17	424	17	565	64	424	17	5.35714
L1-59a	344	1.242	0.721	0.021	0.0859	0.0021	0.31322	549	13	531	13	613	66	531	13	3.27869
L1-60a	431	11.4	2.244	0.082	0.2054	0.0066	0.62241	1190	25	1203	36	1165	61	1165	61	3.2618
L1-62a	1250	2.49	0.3358	0.0098	0.0463	0.001	0.57549	293.1	7.4	291.7	6.2	291	50	291.7	6.2	0.477653
L1-64a	668	1.56	0.269	0.015	0.037	0.0012	0.25323	242	12	234.1	7.4	340	110	234.1	7.4	3.26446
L1-65a	462	2.03	2.628	0.082	0.2139	0.0061	0.61896	1305	23	1249	32	1393	51	1393	51	10.3374
L1-67a	29.7	0.916	0.752	0.064	0.0947	0.0047	0.41887	554	38	581	28	450	150	581	28	4.87365
L1-68a	39.4	5.57	0.663	0.08	0.0818	0.0051	0.29299	505	49	506	31	520	250	506	31	0.19802
L1-69a	352	1.332	3.522	0.063	0.2623	0.0051	0.60672	1529	14	1500	26	1557	34	1557	34	3.66089
L1-72a	321	1.949	0.798	0.037	0.0959	0.0041	0.69245	592	21	589	24	579	67	589	24	0.506757
L1-73a	318	1.932	1.546	0.046	0.1604	0.0043	0.63669	946	19	958	24	913	56	913	56	4.92881
L1-74a	149	7.1	0.723	0.034	0.0885	0.0022	0.24258	547	20	546	13	528	97	546	13	0.182815
L1-75a	1340	4.9	0.447	0.012	0.06	0.0018	0.47353	374.2	8.5	375	11	369	65	375	11	0.213789		euhedral
L1-79a	695	1.53	1.647	0.046	0.1656	0.0042	0.71776	984	17	987	23	962	39	962	39	2.59875
L1-80a	271	2.057	7.77	0.14	0.4045	0.0071	0.61353	2201	16	2187	33	2200	28	2200	28	0.590909
L1-81a	288	1.068	0.437	0.025	0.0579	0.002	0.23655	368	17	363	12	400	110	363	12	1.3587		euhedral
L1-83a	359	15.9	0.836	0.038	0.0907	0.0028	0.66819	611	21	559	16	787	70	559	16	8.51064
L1-85a	717	2.75	4.67	0.25	0.266	0.014	0.64785	1751	47	1513	71	2078	72	2078	72	27.1896
L1-87a	894	4.26	0.52	0.023	0.0677	0.0029	0.4266	423	15	422	18	440	100	422	18	0.236407
L1-88a	917	13.4	2.384	0.093	0.2121	0.0066	0.48023	1235	28	1239	35	1215	72	1215	72	1.97531	Rim
L1-88a	567	1.59	2.877	0.087	0.2228	0.0057	0.61682	1381	26	1296	30	1502	52	1502	52	13.715	Core
L1-90a	93.6	0.814	14.84	0.32	0.546	0.013	0.71189	2799	21	2801	55	2787	31	2787	31	0.502332
L1-91a	721	0.751	0.438	0.015	0.0577	0.0017	0.56017	367	10	361	10	393	66	361	10	1.63488
L1-92a	108.3	1.78	1.754	0.071	0.1719	0.0062	0.36542	1020	26	1019	34	985	91	985	91	3.45178
L1-97a	289	4.7	0.659	0.029	0.0849	0.0021	0.45948	518	18	527	13	441	85	527	13	1.73745
L1-98a	469	3.21	0.663	0.02	0.0808	0.0019	0.62437	514	12	501	12	561	56	501	12	2.52918
L1-100a	154.7	2.158	0.837	0.032	0.0988	0.0019	0.10698	617	18	607	11	600	88	607	11	1.62075
L1-101a	674	2.214	0.806	0.018	0.0999	0.0015	0.51764	598.9	9.8	613.9	9	524	41	613.9	9	2.50459
L1-102a	92	0.846	5.33	0.15	0.3475	0.0079	0.44478	1870	24	1920	38	1799	49	1799	49	6.72596
L1-103a	611	1.75	0.481	0.014	0.0628	0.0013	0.59361	397.4	9.7	392.3	7.9	413	53	392.3	7.9	1.28334
L1-104a	345	2.99	1.742	0.035	0.1728	0.0025	0.30504	1021	13	1029	13	994	43	994	43	3.52113
L1-105a	328	1.265	0.368	0.015	0.04799	0.00088	0.33159	316	11	302.1	5.4	375	84	302.1	5.4	4.39873
L1-110a	307.6	1.525	10.75	0.33	0.384	0.01	0.7991	2500	29	2092	48	2831	30	2831	30	26.1039
L1-111a	55.6	1.122	0.417	0.033	0.0545	0.0017	0.20582	350	24	342	10	370	150	342	10	2.28571		euhedral
L1-112a	532	1.319	0.804	0.03	0.0966	0.0026	0.55915	599	18	594	15	616	76	594	15	0.834725
L1-113a	575	1.76	0.327	0.012	0.04432	0.00085	0.11457	286.4	8.9	279.5	5.3	329	89	279.5	5.3	2.40922
L1-116a	690	1.626	0.473	0.014	0.0632	0.0015	0.53577	393	10	394.8	9.3	364	59	394.8	9.3	0.458015		euhedral
L1-117a	822	8.8	2.17	0.13	0.198	0.011	0.61269	1160	44	1162	57	1130	110	1130	110	2.83186	Rim
L1-117a	324	1.47	2.903	0.069	0.2366	0.0053	0.52104	1380	18	1368	28	1392	44	1392	44	1.72414	Core
L1-118a	623	2.5	0.48	0.013	0.0638	0.0011	0.5038	397	8.8	398.6	6.7	361	54	398.6	6.7	0.403023
L1-119a	543	1.81	0.698	0.028	0.0867	0.0026	0.58002	538	16	535	15	517	74	535	15	0.557621	Rim
L1-119a	274	2.17	0.858	0.059	0.1072	0.0043	0.37417	625	32	656	25	490	140	656	25	4.96	Core
L1-120a	220	1.531	3.804	0.095	0.2789	0.0063	0.55853	1591	21	1584	32	1598	44	1598	44	0.876095
L1-121a	435	3.87	0.797	0.024	0.0966	0.0019	0.49812	593	13	594	11	574	59	594	11	0.168634
L1-122a	233.9	2.69	0.8	0.029	0.0975	0.0024	0.41033	595	17	599	14	557	72	599	14	0.672269
L1-123a	380	8.1	0.512	0.017	0.0682	0.0015	0.37388	419	12	425	9.2	371	71	425	9.2	1.43198		euhedral
L1-124a	171.8	0.733	0.497	0.02	0.0658	0.0014	0.20263	407	13	410.7	8.5	367	86	410.7	8.5	0.909091		euhedral
L1-126a	745	1.66	1.294	0.027	0.1368	0.0024	0.47145	841	12	826	13	886	40	826	13	1.78359
L1-128a	176.3	1.175	3.281	0.065	0.2532	0.0037	0.49796	1475	15	1454	19	1497	33	1497	33	2.87241
L1-130a	280	2.31	0.431	0.017	0.0579	0.0012	0.2603	363	13	362.6	7.5	349	85	362.6	7.5	0.110193
L1-131a	408	2.66	1.847	0.031	0.1775	0.0029	0.47704	1061	11	1053	16	1083	34	1083	34	2.77008
L1-132a	819	3.32	0.3707	0.0091	0.05068	0.00076	0.31994	319.4	6.7	318.7	4.6	317	52	318.7	4.6	0.219161
L1-133a	101.4	1.601	7.14	0.17	0.3779	0.0074	0.54196	2124	21	2064	35	2189	37	2189	37	5.71037
L1-134a	213	1.66	0.936	0.039	0.1077	0.0044	0.34782	666	20	663	27	696	98	663	27	0.45045
L1-136a	556	8.81	0.36	0.011	0.0488	0.0011	0.41499	312.4	8.6	307	7	346	67	307	7	1.72855
L1-138a	536	4.09	0.464	0.017	0.0599	0.0017	0.49184	386	12	375	10	437	72	375	10	2.84974
L1-139a	237	4.03	0.783	0.066	0.0864	0.0051	0.67312	579	37	540	33	700	120	540	33	6.73575
L1-140a	719	1.198	0.473	0.014	0.0631	0.0016	0.56194	391.6	9.8	395.8	9.3	393	58	395.8	9.3	1.07252
L1-1	597	5.68	3.284	0.084	0.2554	0.007	0.73058	1471	20	1463	36	1478	35	1478	35	1.01488
L1-2	1516	41.9	0.397	0.012	0.0535	0.0015	0.68058	338.1	8.5	336	9.2	357	45	336	9.2	0.621118
L1-4	38.1	1.87	0.819	0.058	0.0961	0.0038	0.38068	600	34	590	22	590	140	590	22	1.66667
L1-6	794	1.403	1.505	0.045	0.1416	0.0044	0.79428	928	18	852	25	1105	40	1105	40	22.8959
L1-7	256	4.01	1.721	0.045	0.1688	0.004	0.64253	1014	17	1004	22	1023	44	1023	44	1.85728
L1-8	911	38	0.818	0.068	0.0946	0.0074	0.53389	602	37	582	44	690	160	582	44	3.32226	Rim
L1-8	309	1.96	4.09	0.16	0.2469	0.0078	0.74742	1642	31	1426	42	1922	47	1922	47	25.8065	Core
L1-9	226	3.68	0.827	0.033	0.0966	0.0033	0.55986	610	19	594	20	657	75	594	20	2.62295
L1-10	690	9	0.418	0.013	0.0547	0.0014	0.59259	352.8	9.6	343.2	8.8	380	56	343.2	8.8	2.72109
L1-11	589	3.18	6.83	0.33	0.337	0.014	0.79668	2076	42	1861	68	2268	45	2268	45	17.9453
L1-12	250	1.532	0.775	0.025	0.0931	0.0028	0.49667	580	14	573	16	580	56	573	16	1.2069
L1-13	164.2	2.01	2.037	0.06	0.1866	0.0049	0.64965	1124	20	1101	26	1149	48	1149	48	4.17755
L1-14	399	1.81	5.93	0.18	0.2994	0.0089	0.67552	1963	27	1685	44	2245	40	2245	40	24.9443
L1-15	578	0.621	0.531	0.015	0.0685	0.0016	0.6108	431	10	426.7	9.8	432	53	426.7	9.8	0.99768
L1-16	1017	6.8	2.97	0.12	0.235	0.0083	0.79671	1396	29	1360	43	1435	48	1435	48	5.22648
L1-17	478	0.88	10.31	0.32	0.413	0.013	0.80147	2455	29	2224	57	2650	31	2650	31	16.0755
L1-18	86.3	1.7	1.271	0.078	0.1374	0.0067	0.40945	836	38	834	39	790	110	834	39	0.239234
L1-19	581	1.15	0.487	0.016	0.0636	0.0016	0.7396	402	12	397.4	9.8	412	55	397.4	9.8	1.14428
L1-20	143.3	3.52	1.691	0.055	0.1703	0.0045	0.6889	1000	21	1013	25	955	50	955	50	6.0733
L1-22	217.1	1.052	0.597	0.025	0.0713	0.0021	0.54164	472	16	444	13	574	78	444	13	5.9322
L1-24	177	1.146	0.545	0.022	0.0692	0.002	0.47024	438	14	431	12	468	75	431	12	1.59817
L1-25	70.9	1.997	1.748	0.075	0.1715	0.0058	0.54383	1015	27	1018	32	978	80	978	80	4.08998
L1-27	387	0.426	0.492	0.017	0.0651	0.0022	0.5522	404	12	406	13	396	66	406	13	0.49505
L1-28	62.2	0.65	5.07	0.24	0.284	0.012	0.69835	1822	40	1610	59	2068	60	2068	60	22.147
L1-29	571	4.28	11.56	0.75	0.437	0.03	0.816	2556	62	2330	130	2753	67	2753	67	15.3651
L1-30	82.4	1.506	3.25	0.17	0.255	0.01	0.7235	1458	40	1461	51	1430	74	1430	74	2.16783
L1-31	330	0.852	0.59	0.02	0.0742	0.0025	0.67491	469	13	461	15	494	62	461	15	1.70576
L1-33	525	33.7	5.13	0.15	0.3	0.0071	0.69437	1833	24	1688	35	1990	36	1990	36	15.1759
L1-34	902	1.68	0.363	0.011	0.0491	0.0014	0.63914	313.6	8.1	309.8	8.6	324	51	309.8	8.6	1.21173
L1-35	522	0.768	0.78	0.025	0.0909	0.0027	0.61349	582	15	560	16	655	59	560	16	3.78007
L1-36	1771	13	0.773	0.07	0.0919	0.0083	0.29531	579	40	567	49	640	220	567	49	2.07254	Rim
L1-36	188	1.073	3.3	0.11	0.2538	0.0084	0.70449	1475	25	1455	43	1499	48	1499	48	2.93529	Core
L1-37	656	0.944	11.9	0.36	0.451	0.014	0.81614	2587	28	2391	64	2751	30	2751	30	13.0862
L1-38	556	1.153	0.476	0.018	0.0596	0.0018	0.42142	393	13	373	11	461	72	373	11	5.08906		euhedral
L1-40	495	4.1	1.279	0.098	0.135	0.012	0.44665	827	43	829	75	870	170	829	75	0.241838
L1-41	312	0.798	0.777	0.023	0.0934	0.0026	0.62525	583	14	577	16	597	55	577	16	1.02916
L1-42	215.7	1.709	0.831	0.027	0.097	0.0028	0.64423	611	15	596	16	646	55	596	16	2.45499
L1-43	326	0.927	2.994	0.079	0.2387	0.0062	0.73156	1400	20	1378	32	1433	40	1433	40	3.8381
L1-44	191.1	1.221	0.505	0.019	0.0631	0.0021	0.37345	414	13	394	13	512	86	394	13	4.83092
L1-45	758	0.607	0.314	0.011	0.0439	0.0015	0.69812	277.8	8.7	276.8	9	287	59	276.8	9	0.359971		euhedral
L1-47	352	0.961	0.817	0.031	0.0976	0.0031	0.73349	602	17	599	18	586	53	599	18	0.498339
L1-48	396	4.67	4.32	0.12	0.2636	0.0078	0.8012	1694	24	1505	39	1939	34	1939	34	22.3827
L1-49	82.9	0.952	12.2	0.35	0.481	0.015	0.76801	2609	27	2520	63	2692	32	2692	32	6.3893
L1-50	57.6	1.191	0.935	0.048	0.1084	0.0038	0.51841	663	25	663	22	642	95	663	22	0
L1-51	181.4	0.475	0.454	0.019	0.0597	0.002	0.40763	377	13	373	12	402	83	373	12	1.06101
L1-52	842	1.144	0.785	0.031	0.0959	0.0038	0.78291	585	18	590	22	572	56	590	22	0.854701
L1-53	249	16.4	0.716	0.065	0.0814	0.0052	0.71672	541	38	504	31	690	130	504	31	6.83919	Rim
L1-53	98	1.66	1.99	0.14	0.1737	0.0099	0.86832	1087	47	1028	54	1207	64	1207	64	14.8302	Core
L1-54	450	1.568	0.409	0.016	0.0554	0.0017	0.53503	346	11	347	11	338	73	347	11	0.289017
L1-55	711	0.838	0.659	0.024	0.0772	0.0026	0.71838	512	14	479	16	649	57	479	16	6.44531
L1-57	160	2.63	13.5	0.42	0.498	0.016	0.7615	2706	29	2596	67	2783	34	2783	34	6.71937
L1-58	313	44	0.906	0.047	0.1044	0.0038	0.52077	649	25	640	22	675	92	640	22	1.38675	Rim
L1-58	227	6.18	1.429	0.058	0.138	0.0048	0.55132	898	24	833	27	1061	63	833	27	7.23831	Core
L1-59	475	0.584	0.726	0.023	0.0855	0.0026	0.66405	551	14	529	15	644	54	529	15	3.99274
L1-60	446	2.68	1.092	0.038	0.1236	0.0043	0.77041	745	18	750	24	738	50	750	24	0.671141
L1-61	594	1.474	0.721	0.027	0.0885	0.0026	0.686	547	16	546	15	560	61	546	15	0.182815
L1-62	187.8	1.41	9.75	0.49	0.382	0.016	0.73812	2390	45	2075	76	2694	53	2694	53	22.977
Sample: L2				Isotopic ratios								Isotopic ages (Ma)
Grain #	[U] ppm	U/Th	207/235	2σ error	206/238	2σ error	RHO	207/235	2σ error	206/238	2σ error	207/206	2σ error	Best age	2σ error	% Discordance*	Rim/Core
L2-1a	776	1.32	0.524	0.013	0.0677	0.00088	0.35839	426.8	8.6	422.2	5.3	462	53	422.2	5.3	1.07779		euhedral
L2-2a	1163	7.9	1.235	0.06	0.1247	0.004	0.90228	815	27	758	23	993	71	758	23	6.99387	Rim
L2-2a	396	1.893	3.417	0.092	0.2418	0.0047	0.78209	1503	21	1395	25	1676	31	1676	31	16.7661	Core
L2-3a	490	1.71	0.803	0.016	0.0968	0.0011	0.3348	598.4	9	595.6	6.5	618	42	595.6	6.5	0.467914		euhedral
L2-4a	549	0.812	0.0851	0.005	0.01149	0.00031	0.10705	82.6	4.7	73.7	2	320	120	73.7	2	10.7748
L2-5a	245	1.306	0.566	0.019	0.0704	0.0012	0.17136	453	13	438.7	7.3	522	76	438.7	7.3	3.15673		euhedral
L2-6a	659	56	0.565	0.059	0.0733	0.0037	0.71821	452	38	456	22	440	160	456	22	0.884956	Rim
L2-6a	245	1.929	3.62	0.11	0.2738	0.0077	0.76811	1548	25	1558	39	1555	39	1555	39	0.192926	Core
L2-7a	1450	13.5	0.409	0.028	0.0535	0.0027	0.38564	348	21	336	17	440	160	336	17	3.44828	Rim
L2-7a	49.5	2.05	0.965	0.066	0.1116	0.0032	0.3178	677	34	681	19	610	140	681	19	0.590842	Core
L2-8a	222.3	2.48	0.517	0.017	0.0691	0.001	0.29481	422	12	430.6	6.3	380	70	430.6	6.3	2.03791
L2-9a	150	1.582	3.315	0.073	0.2599	0.0039	0.53264	1480	17	1488	20	1488	37	1488	37	0
L2-10a	257.9	1.09	0.517	0.023	0.0659	0.0015	0.077682	421	15	411.5	9	470	100	411.5	9	2.25653
L2-11a	237	3.08	0.769	0.028	0.0887	0.0013	0.17779	575	16	548	8	690	81	548	8	4.69565
L2-12a	649	6.9	0.893	0.039	0.1057	0.0033	0.64453	646	21	647	19	648	71	647	19	0.154799
L2-13a	1270	2.75	0.506	0.028	0.0613	0.0044	0.18179	415	19	383	27	620	170	383	27	7.71084
L2-14a	549	1.5	0.434	0.011	0.05777	0.00066	0.075468	364.9	7.8	362	4	379	58	362	4	0.794738
L2-15a	533	1.95	12.54	0.17	0.4993	0.0067	0.67214	2644	13	2609	29	2683	18	2683	18	2.75811
L2-16a	619	2.51	0.532	0.015	0.069	0.001	0.34926	431.4	9.8	430	6.1	429	59	430	6.1	0.324525		euhedral
L2-18a	225	3.83	1.894	0.038	0.1813	0.0028	0.37469	1079	14	1074	15	1098	40	1098	40	2.18579
L2-19a	797	0.92	0.824	0.015	0.0983	0.0012	0.37547	609.3	8.3	604.4	7.3	635	37	604.4	7.3	0.804202
L2-20a	307	1.32	0.889	0.025	0.104	0.0018	0.33457	644	13	637	11	658	60	637	11	1.08696
L2-21a	403	1.627	2.81	0.04	0.235	0.0026	0.55232	1356	11	1360	14	1363	28	1363	28	0.220103
L2-22a	1087	1.17	0.4202	0.0097	0.0552	0.00071	0.2694	355.4	6.9	346.3	4.3	410	51	346.3	4.3	2.5605
L2-23a	332	1.25	0.465	0.027	0.0609	0.0013	0.19943	386	19	381.3	8	400	130	381.3	8	1.21762		euhedral
L2-24a	5390	0.0808	0.502	0.011	0.0649	0.0014	0.51363	413.2	7.2	405.6	8.5	457	50	405.6	8.5	1.8393
L2-25a	210.4	1.154	0.912	0.027	0.1072	0.0019	0.31761	655	14	656	11	632	65	656	11	0.152672
L2-26a	340	1.84	1.014	0.025	0.1178	0.0018	0.26046	711	13	719	11	667	56	719	11	1.12518
L2-27a	388	1.594	0.827	0.019	0.0958	0.0011	0.20657	612	11	589.9	6.6	677	51	589.9	6.6	3.61111
L2-28a	569	1.123	0.426	0.014	0.05249	0.00073	0.10905	359.6	9.8	329.7	4.5	531	73	329.7	4.5	8.31479
L2-29a	33.1	0.632	4.82	0.15	0.3241	0.0079	0.37443	1781	27	1806	38	1748	61	1748	61	3.31808
L2-30a	614	error	1.046	0.054	0.1206	0.0036	0.21807	726	27	734	21	700	110	734	21	1.10193	Rim
L2-30a	51	0.689	1.82	0.11	0.1773	0.0045	0.10179	1039	39	1051	25	970	130	970	130	8.35052	Core
L2-31a	91	0.732	4.48	0.11	0.2951	0.0043	0.30761	1720	21	1666	22	1785	49	1785	49	6.66667
L2-32a	468	2.123	0.521	0.014	0.06676	0.00093	0.3533	424.6	9.6	416.5	5.6	447	57	416.5	5.6	1.90768
L2-33a	229	2.29	2.027	0.055	0.1896	0.004	0.46484	1119	18	1118	21	1104	49	1104	49	1.26812
L2-34a	182.6	0.952	1.282	0.04	0.1367	0.0023	0.22863	836	19	826	13	849	67	826	13	1.19617
L2-35a	68	0.89	5.98	0.27	0.3407	0.009	0.47386	1964	39	1888	43	2052	65	2052	65	7.9922	Rim
L2-35a	166	1.6	9.88	0.22	0.4606	0.0087	0.55084	2420	21	2440	38	2398	34	2398	34	1.75146	Core
L2-36a	511	3.75	0.781	0.017	0.096	0.0012	0.35212	584.7	9.6	590.9	7.2	549	46	590.9	7.2	1.06037
L2-37a	145.4	1.077	1.819	0.051	0.1762	0.0026	0.35577	1047	18	1046	14	1030	54	1030	54	1.5534
L2-38a	365	0.5766	0.82	0.023	0.097	0.0013	0.34921	605	13	596.6	7.5	616	57	596.6	7.5	1.38843
L2-40a	195.9	0.632	0.89	0.026	0.1066	0.0015	0.28568	645	15	652.5	8.7	580	65	652.5	8.7	1.16279
L2-41a	52.5	4.24	0.635	0.059	0.08	0.003	0.044638	491	37	496	18	440	200	496	18	1.01833
L2-42a	416	1.461	3.84	0.11	0.2602	0.007	0.69843	1598	23	1490	36	1732	40	1732	40	13.9723
L2-43a	49.2	4.28	2.628	0.088	0.2193	0.0048	0.20518	1299	25	1277	25	1333	68	1333	68	4.20105
L2-44a	508	1.491	0.865	0.026	0.0998	0.0023	0.47361	630	14	613	14	674	59	613	14	2.69841
L2-45a	341	0.54	0.819	0.028	0.0952	0.002	0.28428	606	16	586	11	659	76	586	11	3.30033
L2-47a	534	1.146	0.754	0.032	0.0825	0.0027	0.28724	568	18	511	16	764	91	511	16	10.0352
L2-48a	133.6	1.043	0.578	0.033	0.0697	0.0014	0.060098	458	21	434	8.5	520	120	434	8.5	5.24017
L2-49a	107.5	1.226	0.752	0.062	0.0892	0.0029	0.13497	564	34	550	17	570	170	550	17	2.48227
L2-50a	53.8	0.869	1.801	0.094	0.1724	0.0051	0.19088	1038	33	1024	28	1030	120	1030	120	0.582524
L2-51a	2040	0.0481	0.652	0.03	0.0817	0.0024	0.66989	509	18	506	14	478	59	506	14	0.589391
L2-53a	506	5.2	6.711	0.078	0.3865	0.0043	0.49141	2073	10	2106	20	2032	20	2032	20	3.64173
L2-54a	323	13.17	0.508	0.017	0.0667	0.0018	0.21611	415	11	416	11	396	79	416	11	0.240964
L2-55a	62.6	0.79	0.747	0.047	0.0892	0.0025	0.029744	558	28	550	15	550	140	550	15	1.43369
L2-56a	331	1.181	1.978	0.047	0.1921	0.0036	0.4526	1106	16	1132	19	1044	47	1044	47	8.42912
L2-57a	112.2	1.929	2.216	0.062	0.2006	0.0031	0.29596	1183	20	1178	17	1167	57	1167	57	0.942588
L2-58a	250	1.169	0.562	0.021	0.0731	0.0014	0.14614	450	14	454.7	8.4	406	85	454.7	8.4	1.04444
L2-59a	203.7	3.26	0.653	0.024	0.0801	0.0017	0.30318	507	15	497	10	516	80	497	10	1.97239		euhedral
L2-62a	135.3	0.479	1.867	0.055	0.1746	0.0034	0.43076	1064	20	1036	19	1112	52	1112	52	6.83453
L2-63a	354	1.014	6.122	0.087	0.364	0.0045	0.38752	1991	12	2000	21	1977	27	1977	27	1.16338
L2-64a	398	1.871	0.824	0.022	0.0975	0.0017	0.36277	608	12	599.5	9.7	621	56	599.5	9.7	1.39803
L2-66a	309	1.398	0.857	0.022	0.1033	0.0019	0.34466	626	12	633	11	586	55	633	11	1.11821
L2-67a	228.7	2.354	2.187	0.074	0.2043	0.005	0.29926	1174	24	1198	27	1121	73	1121	73	6.86887
L2-68a	195.6	2.89	5.07	0.11	0.3079	0.0055	0.55578	1827	18	1728	27	1928	32	1928	32	10.3734
L2-69a	412.7	1.659	3.938	0.082	0.2661	0.005	0.57607	1620	17	1520	25	1768	31	1768	31	14.0271
L2-70a	510	2.095	1.708	0.047	0.1626	0.0044	0.647	1008	17	970	24	1102	44	1102	44	11.9782
L2-71a	209	1.604	3.512	0.06	0.2695	0.0029	0.42839	1527	14	1538	15	1506	30	1506	30	2.12483
L2-74a	988	17	0.527	0.034	0.0661	0.0043	0.84684	429	23	412	26	521	87	412	26	3.9627	Rim
L2-74a	82.4	1.44	0.808	0.048	0.0975	0.0034	0.30843	595	27	599	20	550	130	599	20	0.672269	Core
L2-76a	223	2.22	0.859	0.028	0.0969	0.0023	0.12875	627	15	596	14	714	87	596	14	4.94418
L2-77a	429	1.562	0.365	0.013	0.05067	0.00078	0.22562	314.9	9.5	318.6	4.8	287	73	318.6	4.8	1.17498
L2-78a	1186	0.01209	0.457	0.015	0.06048	0.00093	0.21475	382	10	378.5	5.7	390	72	378.5	5.7	0.91623
L2-79a	444	2.321	1.9	0.034	0.1798	0.0029	0.62913	1079	12	1065	16	1115	28	1115	28	4.4843
L2-80a	1130	3.1	0.727	0.015	0.0866	0.0012	0.48914	553.4	8.9	535.5	6.8	621	44	535.5	6.8	3.23455		euhedral
L2-81a	190.5	0.962	0.366	0.017	0.04979	0.00089	0.0043613	314	12	313.2	5.4	326	98	313.2	5.4	0.254777
L2-82a	229	1.231	4.068	0.074	0.2921	0.0036	0.60315	1645	15	1654	19	1625	30	1625	30	1.78462
L2-83a	261	2.97	0.596	0.02	0.0724	0.0013	0.18239	472	12	450.4	7.7	563	73	450.4	7.7	4.57627
L2-84a	293.5	2.56	6.51	0.12	0.3577	0.0073	0.51798	2044	17	1969	34	2112	32	2112	32	6.77083
L2-85a	614	1.249	0.801	0.021	0.0926	0.0015	0.45195	595	12	572.3	8.7	659	52	572.3	8.7	3.81513
L2-86a	361	0.786	0.531	0.016	0.0677	0.001	0.47585	431	10	422.1	6.3	464	58	422.1	6.3	2.06497		euhedral
L2-87a	48.9	3.9	0.922	0.077	0.1069	0.0032	0.16204	644	42	654	18	540	160	654	18	1.5528
L2-88a	617	1.951	0.539	0.014	0.0703	0.001	0.36287	436.6	9.5	437.9	6.2	414	56	437.9	6.2	0.297755
L2-89a	164	6.22	0.868	0.044	0.1011	0.0029	0.21928	631	24	621	17	640	110	621	17	1.58479
L2-90a	37.3	2.34	1.41	0.11	0.1491	0.0053	0.1273	892	45	895	29	790	170	790	29	0.336323
L2-92a	67	0.919	3.187	0.092	0.2448	0.0045	0.24463	1446	23	1410	23	1484	60	1484	60	4.98652
L2-93a	343.1	0.94	0.862	0.023	0.098	0.0016	0.28902	629	12	602.7	9.1	724	55	602.7	9.1	4.18124
L2-94a	539.9	2.394	0.54	0.017	0.0691	0.0013	0.17455	438	11	430.5	7.7	496	72	430.5	7.7	1.71233
L2-95a	428	49	0.604	0.057	0.0723	0.0031	0.36974	478	36	450	19	580	250	450	19	5.85774	Rim
L2-95a	77.3	1.073	3.72	0.12	0.2708	0.0061	0.38811	1574	28	1543	31	1610	63	1610	63	4.16149	Core
L2-96a	100.4	1.206	0.881	0.065	0.1052	0.0046	0.43496	646	38	644	27	620	150	644	27	0.309598
L2-97a	179	2.686	1.686	0.038	0.1713	0.0024	0.2167	1000	14	1019	13	968	46	968	46	5.2686
L2-102a	160	8.8	1.458	0.082	0.1332	0.0044	0.8317	841	29	796	24	910	41	796	24	5.35077
L2-99a	196	1.133	0.911	0.032	0.1067	0.0019	0.28979	654	17	653	11	633	76	653	11	0.152905
L2-100a	654	2.121	0.607	0.016	0.0769	0.0012	0.30981	482	11	477.3	7.5	490	61	477.3	7.5	0.975104
L2-101a	214	2.47	5.04	0.19	0.308	0.013	0.57367	1826	34	1725	61	1948	65	1948	65	11.4476
L2-102a	101.2	0.702	1.887	0.063	0.1773	0.0038	0.34789	1069	22	1054	21	1096	61	1096	61	3.83212
L2-103a	525	1.475	1.082	0.03	0.1225	0.003	0.57819	741	14	744	17	735	53	744	17	0.404858
L2-106a	354	4.63	1.8	0.13	0.1454	0.0076	0.87054	915	44	854	42	1071	57	1071	57	20.2614
L2-104a	525	42	0.561	0.03	0.0692	0.0026	0.44302	455	22	431	16	560	120	431	16	5.27473	Rim
L2-104a	165.3	1.122	4.67	0.12	0.3007	0.0069	0.5588	1758	22	1694	34	1835	44	1835	44	7.68392	Core
L2-105a	454	9.24	0.603	0.019	0.0758	0.002	0.41912	477	12	471	12	525	69	471	12	1.25786
L2-106a	115.3	1.701	3.322	0.081	0.2547	0.004	0.24508	1483	19	1462	20	1518	48	1518	48	3.68906
L2-107a	2150	0.01172	0.766	0.011	0.08868	0.00088	0.27621	576.7	6.3	547.6	5.2	685	32	547.6	5.2	5.04595
L2-108a	760	1.561	0.618	0.02	0.0791	0.0019	0.51438	487	12	491	11	460	57	491	11	0.821355
L2-111a	110	0.628	0.874	0.037	0.1021	0.0022	0.018834	632	20	626	13	621	94	626	13	0.949367
L2-120a	307	2.346	2.336	0.039	0.2069	0.0025	0.38398	1221	12	1212	13	1234	33	1234	33	1.78282
L2-122a	342.7	1.445	0.394	0.017	0.0528	0.0011	0.32924	335	12	331.5	6.9	335	87	331.5	6.9	1.04478
L2-131a	45.8	26.4	2.62	0.41	0.1639	0.0095	0.82061	1023	59	957	51	1074	77	1074	77	10.8939
L2-128a	68.3	0.868	4.79	0.17	0.3183	0.0084	0.44994	1779	29	1780	41	1779	59	1779	59	0.0562114
L2-3	834	1.916	0.372	0.01	0.0512	0.0014	0.74256	321.3	7.7	321.7	8.5	333	43	321.7	8.5	0.124494		euhedral
L2-5	1282	1.709	0.521	0.014	0.0633	0.0019	0.75368	424.8	9.7	398	11	605	48	398	11	6.30885		euhedral
L2-6	162	0.84	2.18	0.096	0.1827	0.0062	0.73009	1169	31	1081	33	1330	60	1330	60	18.7218
L2-7	503	0.511	0.94	0.032	0.1079	0.0035	0.64277	671	17	660	20	708	60	660	20	1.63934
L2-8	239	1.273	0.509	0.028	0.0642	0.002	0.48095	415	19	401	12	470	110	401	12	3.37349
L2-9	437	1.914	4	0.15	0.277	0.011	0.78	1618	32	1569	53	1694	43	1694	43	7.37898
L2-12	345	1.85	1.924	0.055	0.1824	0.0053	0.75523	1084	19	1078	29	1093	40	1093	40	1.37237
L2-14	277	1.415	0.804	0.035	0.09	0.0027	0.64888	599	20	555	16	745	73	555	16	7.34558
Sample: L3				Isotopic ratios								Isotopic ages (Ma)
Grain #	[U] ppm	U/Th	207/235	2σ error	206/238	2σ error	RHO	207/235	2σ error	206/238	2σ error	207/206	2σ error	Best age	2σ error	% Discordance*	Rim/Core
L3_1	52.5	0.673	0.46	0.057	0.0567	0.0034	0.078132	382	40	355	21	460	290	355	21	7.06806
L3_3	314	1.46	10.11	0.31	0.403	0.013	0.82996	2443	29	2178	57	2685	23	2685	23	18.8827
L3_4	51.1	1.534	0.882	0.047	0.1041	0.0035	0.32331	641	26	638	20	660	120	638	20	0.468019
L3_6	573	8.66	0.575	0.026	0.0698	0.0015	0.40248	464	18	435.1	9.3	604	96	435.1	9.3	6.22845
L3_7	310	2.493	2.957	0.044	0.2368	0.0025	0.64598	1395	11	1369	13	1448	21	1448	21	5.4558
L3_8	543	1.58	4.56	0.14	0.2811	0.0079	0.96126	1738	27	1595	40	1929	21	1929	21	17.3147
L3_9	562	1.185	0.789	0.025	0.0959	0.0029	0.6337	589	14	590	17	608	68	590	17	0.169779
L3_10	640	3.32	0.531	0.014	0.0686	0.0016	0.53258	431.7	9	427.8	9.4	443	53	427.8	9.4	0.903405
L3_11	528	2.09	0.314	0.022	0.039	0.0013	0.69906	280	19	246.4	8.3	525	93	246.4	8.3	12
L3_12	1211	0.945	5.05	0.14	0.307	0.013	0.67525	1828	24	1725	62	1961	55	1961	55	12.0347
L3_13	1685	2.67	0.3388	0.0072	0.04469	0.00085	0.68403	295.9	5.4	281.8	5.2	411	33	281.8	5.2	4.76512
L3_15	520	2.59	0.807	0.029	0.0958	0.0033	0.6386	597	16	589	19	677	60	589	19	1.34003
L3_16	848	1.705	2.646	0.067	0.2122	0.0054	0.91488	1311	20	1239	29	1445	27	1445	27	14.2561
L3_17	97.1	1.382	0.874	0.029	0.102	0.0017	0.42421	634	15	626	10	685	69	626	10	1.26183
L3_19	415	0.662	1.511	0.032	0.1378	0.0025	0.75912	934	13	832	14	1208	30	832	14	10.9208
L3_20	570	1.7	0.382	0.021	0.0501	0.0014	0.5937	328	16	315	8.6	410	110	315	8.6	3.96341
L3_21	977	1.66	0.537	0.025	0.0651	0.0025	0.5605	436	16	406	15	550	110	406	15	6.88073
L3_22	284	1.207	0.601	0.03	0.0664	0.0024	0.49826	476	19	415	15	797	85	415	15	12.8151
L3_23	141	0.95	11.8	0.23	0.4428	0.0085	0.74683	2583	18	2365	37	2772	22	2772	22	14.6825
L3_24	427	1.48	0.884	0.027	0.1043	0.0026	0.83371	641	15	642	16	648	45	642	16	0.156006
L3_25	340	0.69	0.733	0.02	0.0856	0.0015	0.39457	557	12	529.3	9.2	673	59	529.3	9.2	4.97307
L3_26	72.5	0.627	4.52	0.14	0.2826	0.008	0.73552	1732	26	1600	40	1905	42	1905	42	16.0105
L3_27	67.9	3.2	0.805	0.032	0.096	0.0018	0.21086	599	19	591	11	615	91	591	11	1.33556
L3_28	279	2.49	0.935	0.032	0.1075	0.0032	0.56267	667	17	658	18	692	63	658	18	1.34933
L3_29	310	1.567	0.412	0.012	0.05467	0.00097	0.46811	349.5	8.5	343	5.9	394	52	343	5.9	1.8598
L3_30	323	1.571	0.724	0.022	0.0831	0.002	0.63182	552	13	515	12	639	48	515	12	6.7029
L3_31	930	2.93	0.703	0.032	0.0849	0.0029	0.42272	540	19	525	17	600	92	525	17	2.77778
L3_32	157.7	0.798	6.14	0.26	0.346	0.013	0.57344	1988	36	1913	62	2060	67	2060	67	7.13592
L3_34	251.4	0.836	0.516	0.014	0.065	0.0012	0.34559	421.1	9.2	406	7	501	56	406	7	3.58585
L3_35	212.5	2.82	0.472	0.015	0.0613	0.0017	0.53354	391	10	383	10	459	66	383	10	2.04604
L3_36	220	1.539	3.756	0.093	0.2368	0.0058	0.78054	1579	20	1368	30	1872	30	1872	30	26.9231
L3_37	420	0.9	0.498	0.022	0.0633	0.0021	0.43805	409	15	395	12	463	84	395	12	3.42298		euhedral
L3_38	510	3.03	0.521	0.014	0.0646	0.0013	0.46893	424.8	9	403.2	7.6	543	52	403.2	7.6	5.08475
L3_39	523	1.72	0.44	0.022	0.0511	0.0021	0.54208	372	14	321	13	705	85	321	13	13.7097
L3_40	84.8	2.25	1.532	0.087	0.1555	0.0082	0.72191	936	35	930	46	936	74	936	74	0.641026
L3_42	873	4.95	0.566	0.018	0.0628	0.0017	0.76469	457	12	393	10	786	46	393	10	14.0044
L3_43	485	1.174	0.768	0.021	0.0881	0.0018	0.55767	578	12	544	11	672	50	544	11	5.88235
L3_45	266	6.14	6.2	0.23	0.343	0.015	0.7355	2000	34	1898	73	2090	46	2090	46	9.1866
L3_46	405	1.94	3.97	0.11	0.267	0.0088	0.55546	1624	23	1523	45	1761	55	1761	55	13.515
L3_47	339	9.09	0.603	0.017	0.0747	0.0012	0.403	481	12	464.3	7.3	531	63	464.3	7.3	3.47193
L3_48	1600	52	0.46	0.047	0.0595	0.0055	0.58145	383	33	372	34	430	250	372	34	2.87206	Rim
L3_48	419	2.533	1.337	0.033	0.1326	0.0023	0.64208	861	14	802	13	1006	40	802	13	6.8525	Core
L3_49	281	1.493	3.675	0.058	0.2647	0.0038	0.64976	1565	13	1513	20	1623	21	1623	21	6.77757
L3_50	886	3.38	8.7	0.21	0.4028	0.0084	0.74266	2303	22	2180	39	2406	32	2406	32	9.39318
L3_51	819	3.62	2.341	0.088	0.1888	0.0065	0.3559	1221	27	1114	36	1434	63	1434	63	22.3152
L3_52	832	4.92	0.542	0.016	0.0642	0.0018	0.76983	438	11	401	11	623	40	401	11	8.44749		euhedral
L3_53	257	0.848	0.694	0.025	0.0805	0.0015	0.40332	533	15	498.8	9.1	661	71	498.8	9.1	6.41651
L3_54	658	1.99	0.598	0.044	0.0742	0.0048	0.4761	470	28	460	29	510	140	460	29	2.12766
L3_55	228	2.96	0.876	0.023	0.1033	0.002	0.49576	636	13	633	12	630	54	633	12	0.471698
L3_57	72.4	0.989	0.724	0.052	0.0896	0.0035	0.2475	550	30	553	21	540	170	553	21	0.545455
L3_58	400	1.428	0.43	0.012	0.0564	0.0011	0.30881	362	8.6	353.8	6.4	405	65	353.8	6.4	2.26519		euhedral
L3_59	182	1.64	3.572	0.075	0.2527	0.0056	0.66013	1541	17	1451	29	1651	33	1651	33	12.1139
L3_60	318	0.745	0.815	0.044	0.0934	0.0032	0.31799	603	25	576	19	650	130	576	19	4.47761
L3_61	253.4	0.994	0.506	0.014	0.0651	0.001	0.24944	414.5	9.2	406.7	6.1	432	60	406.7	6.1	1.88179
L3_62	953	2.83	0.712	0.029	0.0873	0.0035	0.58932	544	17	539	21	572	84	539	21	0.919118
L3_63	212.2	1.347	6.15	0.23	0.355	0.012	0.85958	1993	32	1958	56	2024	33	2024	33	3.26087
L3_65	632	0.97	0.706	0.016	0.0818	0.0013	0.65376	541.1	9.8	507	8	667	44	507	8	6.30198
L3_67	452	3.67	0.414	0.011	0.0543	0.001	0.55898	351.2	7.8	341.1	6.1	403	54	341.1	6.1	2.87585
L3_69	108.1	0.56	0.785	0.044	0.0839	0.0035	0.53388	588	24	519	21	830	100	519	21	11.7347
L3_71	165	0.793	6.45	0.24	0.349	0.011	0.66399	2032	32	1927	49	2135	49	2135	49	9.74239
L3_72	584	2.109	3.45	0.14	0.2342	0.009	0.70268	1498	34	1351	47	1746	30	1746	30	22.6231
L3_73	957	35	0.703	0.014	0.0841	0.0014	0.69644	539.8	8.3	520.6	8.4	610	32	520.6	8.4	3.55687
L3_74	920	0.938	0.99	0.057	0.102	0.0062	0.71016	699	28	624	36	910	83	624	36	10.7296	Rim
L3_74	434	1.014	1.208	0.039	0.1317	0.0027	0.78427	802	18	797	16	799	42	797	16	0.623441	Core
L3_75	1060	11.6	0.556	0.044	0.0677	0.0053	0.59012	448	28	422	32	560	150	422	32	5.80357
L3_76	350	1.99	2.814	0.081	0.2217	0.0048	0.82861	1357	22	1291	25	1453	33	1453	33	11.1493
L3_77	157	1.12	0.738	0.03	0.0896	0.0028	0.57186	559	17	553	17	565	84	553	17	1.07335
L3_78	106	1.43	1.386	0.073	0.1253	0.0062	0.80383	874	32	759	35	1191	69	759	35	13.1579
L3_79	840	2.27	0.557	0.018	0.0711	0.0017	0.27585	449	11	443	10	462	75	443	10	1.3363		euhedral
L3_80	209	1.391	4.032	0.085	0.2778	0.0041	0.58684	1636	17	1579	21	1709	29	1709	29	7.60679
L3_81	840	2.78	0.503	0.035	0.0661	0.0034	0.64176	411	24	412	20	380	120	412	20	0.243309
L3_82	522	3.3	1.814	0.084	0.1744	0.0079	0.74617	1049	30	1036	43	1063	65	1063	65	2.53998
L3_83	652	2.21	0.8	0.022	0.0955	0.0025	0.45012	597	13	588	15	631	54	588	15	1.50754
L3_84	459	1.81	1.541	0.038	0.1484	0.0026	0.67065	945	15	892	15	1062	39	1062	39	16.0075
L3_85	254	0.541	0.762	0.043	0.092	0.0033	0.73385	572	25	567	19	565	86	567	19	0.874126		euhedral
L3_86	808	0.871	3.396	0.096	0.2321	0.0063	0.75518	1500	22	1344	33	1713	35	1713	35	21.5412
L3_87	1086	13.3	0.827	0.015	0.0966	0.0015	0.62579	611.2	8.1	594.5	8.9	664	33	594.5	8.9	2.73233
L3_88	314	15.5	2.174	0.043	0.2004	0.0036	0.73224	1171	14	1177	19	1160	28	1160	28	1.46552
L3_89	623	8.29	0.425	0.011	0.05589	0.00087	0.48378	359	7.6	350.5	5.3	398	49	350.5	5.3	2.36769
L3_90	1169	2.39	0.549	0.013	0.0633	0.0014	0.88483	443.5	8.6	395.8	8.7	691	31	395.8	8.7	10.7554
L3_91	1559	4.66	1.558	0.037	0.1371	0.0028	0.66002	952	14	828	16	1225	39	828	16	13.0252
L3_92	257	2.58	1.389	0.036	0.1412	0.0026	0.60239	884	16	851	15	958	44	958	44	11.1691
L3_93	308.9	1.167	1.392	0.036	0.1406	0.0038	0.54102	883	15	851	20	965	56	965	56	11.8135
L3_94	140.1	1.4	0.861	0.04	0.0995	0.0037	0.35316	628	22	611	21	680	110	611	21	2.70701
L3_95	571	4.33	0.861	0.066	0.091	0.0061	0.87079	617	36	558	36	812	57	558	36	9.5624
L3_96	1352	1.21	0.554	0.031	0.0711	0.0058	0.62296	447	20	442	35	480	130	442	35	1.11857	Rim
L3_96	410	1.368	0.843	0.021	0.1019	0.0017	0.59172	620	12	625.6	9.9	587	47	625.6	9.9	0.903226	Core
L3_97	127.2	1.363	0.803	0.021	0.097	0.0018	0.31034	597	12	597	10	580	59	597	10	0
L3_98	167.5	2.51	0.608	0.016	0.0761	0.0011	0.38763	480.7	9.8	472.9	6.4	503	52	472.9	6.4	1.62263
L3_100	1294	4.158	0.3694	0.0094	0.044	0.00074	0.27516	318.4	6.9	277.5	4.6	607	56	277.5	4.6	12.8455
L3_101	156.4	5.3	0.666	0.036	0.0831	0.0031	0.68989	524	23	514	18	549	83	514	18	1.9084
L3_102	588	2.77	0.915	0.087	0.1048	0.0073	0.60437	653	46	642	43	620	180	642	43	1.68453
L3_103	364	3.98	0.454	0.012	0.0579	0.0011	0.52455	379.8	8.3	362.7	6.4	467	53	362.7	6.4	4.50237
L3_104	446	3.19	0.85	0.046	0.1015	0.0052	0.78024	629	28	622	30	644	80	622	30	1.11288		euhedral
L3_105	334	1.26	5.27	0.14	0.2927	0.008	0.77512	1858	24	1653	40	2100	34	2100	34	21.2857
L3_107	307	0.711	4.63	0.081	0.3067	0.0047	0.74218	1752	15	1723	23	1781	22	1781	22	3.2566
L3_108	475	3.62	0.456	0.011	0.05573	0.00096	0.33515	380.3	7.8	349.5	5.9	532	57	349.5	5.9	8.09887		euhedral
L3_109	449	46	0.949	0.096	0.109	0.01	0.73194	672	51	664	60	700	160	664	60	1.19048	Rim
L3_109	468	2.64	1.341	0.029	0.1373	0.0026	0.61259	862	12	829	15	946	38	829	15	3.82831	Core
L3_110	743	3.91	0.523	0.024	0.065	0.0031	0.31423	425	16	406	18	530	110	406	18	4.47059
L3_111	219	2.31	0.654	0.026	0.0816	0.0018	0.39549	509	16	506	11	515	81	506	11	0.589391
L3_112	71.7	0.883	0.686	0.045	0.0844	0.0037	0.035143	528	27	522	22	530	170	522	22	1.13636
L3_113	758	11.5	3.947	0.092	0.2706	0.0046	0.73938	1620	19	1542	23	1720	30	1720	30	10.3488
L3_114	1454	5.01	0.705	0.026	0.0864	0.0027	0.77663	541	16	534	16	564	56	534	16	1.2939
L3_115	1196	2.75	0.36	0.015	0.0472	0.0016	0.67929	311	11	297.3	9.8	433	70	297.3	9.8	4.40514
L3_116	621	3.02	2.174	0.052	0.1986	0.0056	0.38292	1171	17	1167	30	1188	59	1188	59	1.76768
L3_117	502	23.7	5.736	0.089	0.3215	0.0046	0.78712	1934	14	1796	23	2084	18	2084	18	13.8196
L3_118	74.7	2.397	0.623	0.026	0.0807	0.0013	0.26203	488	16	500.3	7.9	398	84	500.3	7.9	2.52049
L3_119	827	1.247	0.828	0.019	0.0944	0.0015	0.47905	612	11	581.6	8.9	719	44	581.6	8.9	4.96732
L3_120	230.8	1.005	0.803	0.025	0.0921	0.0015	0.46957	597	14	569.4	9.4	690	62	569.4	9.4	4.62312
L3_121	359	1.403	0.617	0.014	0.0759	0.0014	0.57545	486.5	9	471.7	8.4	540	49	471.7	8.4	3.04214
L3_122	564	3.22	0.507	0.012	0.0646	0.001	0.5478	415.4	7.9	403.8	6.1	472	47	403.8	6.1	2.79249
L3_123	1410	4.7	0.383	0.011	0.0494	0.001	0.69124	328.6	8.1	310.7	6.4	474	49	310.7	6.4	5.44735
L3_124	607	1.589	0.574	0.014	0.0727	0.0014	0.57609	460.9	9.1	452.4	8.2	497	46	452.4	8.2	1.84422
L3_126	562	0.486	0.737	0.031	0.0872	0.0045	0.63682	566	19	538	27	692	92	538	27	4.947
L3_127	635	2.151	1.165	0.038	0.1272	0.0023	0.4334	781	17	772	13	827	51	772	13	1.15237
L3_128	446	2.354	0.543	0.014	0.0663	0.0013	0.59068	439.4	9.1	413.6	7.6	567	54	413.6	7.6	5.87164
L3_129	767	3.14	1.681	0.038	0.1608	0.003	0.75911	999	14	961	17	1090	29	1090	29	11.8349
L3_130	80.8	1.76	0.898	0.034	0.1077	0.0023	0.35353	647	18	659	14	580	78	659	14	1.85471
L3_131	862	10.02	0.887	0.034	0.1015	0.0034	0.68145	646	18	622	20	714	51	622	20	3.71517
L3_132	324	2.36	1.962	0.05	0.1742	0.0041	0.74719	1098	18	1034	23	1229	34	1229	34	15.8666
L3_133	397	2.198	0.764	0.015	0.093	0.0014	0.47527	575.3	8.6	573.1	8.3	573	40	573.1	8.3	0.382409
L3_134	518	0.542	0.892	0.023	0.1057	0.0024	0.49337	646	12	650	15	631	52	650	15	0.619195	Rim
L3_134	359	0.638	0.984	0.032	0.1121	0.0023	0.62797	695	17	685	14	716	59	685	14	1.43885	Core
L3_135	225	0.834	0.307	0.019	0.042	0.0015	0.17512	271	15	265.2	9	300	130	265.2	9	2.14022		euhedral
L3_136	577	5.48	0.442	0.014	0.0588	0.0012	0.55199	371.4	9.7	368.4	7.6	383	57	368.4	7.6	0.807754
L3_137	665	5.17	1.03	0.1	0.1026	0.0079	0.63702	707	51	628	46	950	160	628	46	11.174
L3_139	409	4.52	0.765	0.016	0.0888	0.0017	0.60584	578.6	9.2	548	10	691	40	548	10	5.28863
L3_140	1029	2.051	0.598	0.01	0.07231	0.00096	0.65349	475.7	6.6	450	5.8	600	29	450	5.8	5.40256
L3_141	1240	2.89	0.418	0.02	0.0482	0.0024	0.88234	354	14	303	15	703	48	303	15	14.4068	Rim
L3_141	143.1	1.166	1.238	0.034	0.1362	0.0024	0.48201	816	15	823	14	776	54	823	14	0.857843	Core
L3_142	475	2.49	0.892	0.023	0.0993	0.0025	0.5256	649	12	610	15	753	49	610	15	6.00924
L3_144	657	3.67	0.913	0.047	0.107	0.0041	0.63333	658	23	655	24	658	85	655	24	0.455927
L3_145	493	2.12	0.788	0.057	0.0796	0.0046	0.91368	575	32	492	28	924	58	492	28	14.4348
L3_146	1065	3.16	0.404	0.036	0.0519	0.004	0.34914	343	26	326	24	450	210	326	24	4.95627
L3_148	513	4.49	0.701	0.053	0.0836	0.0056	0.53892	532	30	517	34	610	130	517	34	2.81955
L3_149	179.6	0.935	11.82	0.49	0.412	0.014	0.92001	2586	39	2224	63	2885	29	2885	29	22.9116
L3_150	133.3	2.76	1.886	0.05	0.1805	0.0033	0.54057	1075	17	1069	18	1081	49	1081	49	1.11008
L3_151	1344	0.695	0.754	0.016	0.0799	0.0019	0.50235	569.7	9.3	495	11	881	45	495	11	13.1122
L3_153	157	1.986	0.433	0.018	0.04999	0.00097	0.20225	364	13	314.4	5.9	609	93	314.4	5.9	13.6264
L3_154	468	1.13	0.506	0.029	0.0578	0.002	0.71398	415	20	362	12	705	88	362	12	12.7711
L3_155	236	1.85	1.523	0.046	0.1479	0.0032	0.39348	938	18	889	18	1048	54	1048	54	15.1718
L3_157	182.8	1.506	4.86	0.11	0.3025	0.0052	0.61089	1794	18	1703	26	1899	32	1899	32	10.3212
L3_158	300.2	1.648	0.848	0.033	0.1021	0.0047	0.54319	626	19	626	27	647	85	626	27	0
L3_160	252	4.08	0.69	0.034	0.0865	0.004	0.44017	531	20	535	24	550	120	535	24	0.753296
L3_161	291	1.12	1.259	0.078	0.1235	0.007	0.69608	824	35	750	40	1025	94	750	40	8.98058
L3_162	883	1.279	2.81	0.11	0.2207	0.0092	0.47623	1354	29	1284	49	1466	77	1466	77	12.4147
Sample: L4				Isotopic ratios								Isotopic ages (Ma)
Grain #	[U] ppm	U/Th	207/235	2σ error	206/238	2σ error	RHO	207/235	2σ error	206/238	2σ error	207/206	2σ error	Best age	2σ error	% Discordance*	Rim/Core
L4-1a	27	0.361	12.85	0.44	0.5	0.013	0.45838	2658	32	2609	56	2696	52	2696	52	3.227
L4-2a	758	0.947	2.017	0.053	0.1663	0.0038	0.46747	1120	18	991	21	1376	51	1376	51	27.9797
L4-3a	659	12	6.15	0.083	0.3597	0.0041	0.7089	1997	12	1980	19	2010	18	2010	18	1.49254
L4-4a	160.3	1.799	1.522	0.046	0.1575	0.0028	0.085111	939	19	943	16	916	72	916	72	2.9476
L4-5a	150.9	1	0.842	0.033	0.1028	0.0018	0.0055219	618	18	631	10	535	91	631	10	2.10356
L4-6a	700	3.02	0.806	0.016	0.098	0.0016	0.56093	600.4	9.1	602.7	9.1	585	41	602.7	9.1	0.383078
L4-7a	1580	10.63	0.4797	0.0089	0.06218	0.00099	0.58231	397.3	6.1	388.8	6	446	36	388.8	6	2.13944
L4-8a	100.4	1.075	7.03	0.18	0.3811	0.0076	0.60029	2110	22	2080	35	2129	37	2129	37	2.30155
L4-9a	116.8	2.36	1.55	0.063	0.1552	0.0038	0.4127	943	26	929	21	959	79	959	79	3.12826
L4-10a	426	3.12	0.844	0.023	0.1022	0.0017	0.25733	620	13	627	10	576	59	627	10	1.12903	Rim
L4-10a	159.5	0.462	1.116	0.076	0.1252	0.0037	0.68482	757	36	760	21	720	120	760	21	0.396301	Core
L4-11a	492	10.74	1.606	0.042	0.1641	0.0036	0.50903	971	16	979	20	940	51	940	51	4.14894
L4-12a	404	1.842	25.93	0.58	0.688	0.013	0.63454	3344	23	3372	52	3311	24	3311	24	1.84234		euhedral
L4-13a	92.1	1.829	3.8	0.13	0.2737	0.0065	0.40222	1590	27	1558	33	1616	61	1616	61	3.58911
L4-14a	662	1.34	0.457	0.016	0.0597	0.001	0.079465	381	11	373.9	6.4	394	84	373.9	6.4	1.86352	Rim
L4-14a	259	1.362	0.515	0.041	0.0678	0.0022	0.085276	419	27	423	13	360	160	423	13	0.954654	Core
L4-15a	104.1	2.006	2.828	0.076	0.2261	0.0038	0.2392	1357	20	1313	20	1400	54	1400	54	6.21429
L4-16a	354	5.44	0.812	0.02	0.0975	0.0015	0.17415	601	11	599.3	8.7	577	58	599.3	8.7	0.282862		euhedral
L4-17a	208.3	1.819	1.727	0.04	0.1743	0.0023	0.30626	1019	15	1036	13	949	49	949	49	9.16754
L4-18a	108	2.145	0.667	0.035	0.0828	0.0018	0.049388	512	22	513	11	460	120	513	11	0.195312
L4-19a	736	1.753	2.879	0.076	0.2123	0.0052	0.69352	1373	20	1240	27	1568	39	1568	39	20.9184
L4-20a	815	3.48	0.515	0.012	0.0677	0.0014	0.52513	420.5	7.9	422.3	8.4	393	52	422.3	8.4	0.428062		euhedral
L4-21a	978	10.81	0.803	0.048	0.094	0.0038	0.49556	596	27	579	22	620	120	579	22	2.85235
L4-22a	662	7.14	0.825	0.045	0.0921	0.0039	0.31102	608	25	568	23	720	130	568	23	6.57895
L4-23a	1118	0.854	0.51	0.015	0.0666	0.0011	0.22229	419.4	9.1	415.7	6.3	415	60	415.7	6.3	0.882213
L4-24a	369	0.953	0.881	0.022	0.1029	0.0016	0.37983	639	12	631.3	9.2	628	51	631.3	9.2	1.20501
L4-27a	212	10.7	1.54	0.11	0.1373	0.0061	0.93906	854	37	816	34	881	48	816	34	4.44965
L4-25a	1096	8.4	1.527	0.065	0.1393	0.0034	0.48143	940	26	841	19	1149	76	841	19	10.5319	Rim
L4-25a	399	1.682	4.179	0.073	0.2845	0.0044	0.56445	1668	14	1613	22	1713	28	1713	28	5.83771	Core
L4-26a	388	1.234	1.829	0.039	0.1735	0.0026	0.38808	1053	14	1031	14	1074	44	1074	44	4.00372
L4-27a	366	2.173	0.415	0.014	0.05421	0.00084	0.11592	351.2	9.8	340.3	5.1	377	74	340.3	5.1	3.10364
L4-28a	474	5.69	0.682	0.018	0.0836	0.0014	0.36505	526	11	517.5	8	514	57	517.5	8	1.61597
L4-31a	214	4.93	2.12	0.24	0.1328	0.0094	0.99177	851	59	775	50	936	75	775	50	8.93067
L4-29a	393	18.8	8.75	0.26	0.382	0.01	0.79386	2310	27	2083	47	2495	31	2495	31	16.513
L4-30a	176.4	1.99	0.812	0.042	0.0909	0.0035	0.43884	601	24	567	22	690	110	567	22	5.65724
L4-31a	523	1.214	0.579	0.017	0.0742	0.0012	0.12594	464	11	461.1	7.5	442	69	461.1	7.5	0.625
L4-32a	625	1.165	0.545	0.013	0.0712	0.0012	0.49135	440.7	8.8	443.3	7.3	395	52	443.3	7.3	0.589971
L4-33a	660	1.085	0.635	0.023	0.0771	0.0028	0.64226	499	14	478	17	554	66	478	17	4.20842
L4-34a	373	1.508	4.677	0.083	0.3143	0.0047	0.56207	1762	15	1761	23	1738	29	1738	29	1.32336
L4-35a	32.2	1.77	1.42	0.1	0.1462	0.0052	0.26815	871	45	878	30	790	160	790	30	0.803674
L4-36a	51.9	1.97	2.79	0.11	0.229	0.0046	0.20824	1344	30	1328	24	1331	81	1331	81	0.225394
L4-37a	425	0.814	0.469	0.014	0.0617	0.0011	0.38779	391	10	385.9	6.5	375	65	385.9	6.5	1.30435
L4-38a	156	2.51	5.74	0.21	0.3104	0.0092	0.65694	1929	33	1740	45	2120	50	2120	50	17.9245
L4-39a	362	0.657	0.355	0.013	0.04788	0.0009	0.10318	306.9	9.8	301.4	5.5	315	84	301.4	5.5	1.79211
L4-40a	57.9	1.907	1.219	0.062	0.131	0.0031	0.11833	801	29	793	18	760	110	793	18	0.998752
L4-41a	536	1.084	0.3249	0.0094	0.04431	0.00066	0.27159	284.9	7.2	279.5	4.1	303	61	279.5	4.1	1.8954
L4-42a	264	2.465	3.979	0.082	0.2881	0.0044	0.45441	1627	17	1631	22	1601	37	1601	37	1.87383
L4-43a	405	2.23	2.633	0.038	0.2255	0.0028	0.52148	1308	10	1310	15	1287	26	1287	26	1.7871
L4-44a	438	15.4	0.633	0.04	0.0792	0.0022	0.42551	496	25	491	13	480	120	491	13	1.00806	Rim
L4-44a	267.6	3.23	0.711	0.025	0.0874	0.0013	0.17346	543	15	540	7.8	512	75	540	7.8	0.552486	Core
L4-45a	147.5	1.389	0.826	0.032	0.1007	0.0018	0.15371	608	18	618	10	537	81	618	10	1.64474
L4-46a	1180	5.01	0.842	0.086	0.0998	0.0072	0.45044	618	48	613	43	620	220	613	43	0.809061	Rim
L4-46a	343	3.67	1.663	0.079	0.1664	0.0047	0.5499	992	30	992	26	973	78	973	78	1.95272	Core
L4-47a	1250	11.7	0.92	0.11	0.102	0.01	0.85481	652	55	626	61	740	120	626	61	3.98773	Rim
L4-47a	188	2.004	5.35	0.14	0.3384	0.0079	0.56596	1874	22	1878	38	1859	44	1859	44	1.02205	Core
L4-48a	251	1.81	3.449	0.093	0.2673	0.007	0.67522	1510	21	1525	36	1482	43	1482	43	2.90148
L4-49a	231.5	6.84	2.281	0.053	0.2055	0.0029	0.46153	1202	16	1204	15	1185	42	1185	42	1.60338
L4-50a	194	1.89	1.765	0.068	0.1636	0.0031	0.28341	1031	26	976	17	1120	72	1120	72	12.8571
L4-51a	1997	17.8	3.035	0.054	0.2381	0.0031	0.65928	1415	14	1377	16	1465	27	1465	27	6.00683
L4-52a	190.7	1.003	0.828	0.033	0.0974	0.0022	0.35404	608	18	599	13	618	84	599	13	1.48026
L4-53a	622	3.65	2.447	0.058	0.2068	0.0044	0.36854	1255	17	1211	23	1323	50	1323	50	8.46561
L4-54a	143.8	2.28	2.021	0.088	0.1755	0.0048	0.49785	1117	30	1041	27	1273	72	1273	72	18.2247
L4-55a	795	1.319	0.439	0.011	0.05868	0.00085	0.12831	369.7	8.3	367.6	5.2	364	61	367.6	5.2	0.568028		euhedral
L4-56a	550	2.431	3.924	0.053	0.2857	0.0037	0.48534	1619	11	1619	19	1612	25	1612	25	0.434243
L4-57a	379	16.7	1.65	0.051	0.1623	0.0048	0.43176	989	20	969	27	1033	67	1033	67	6.19555	Rim
L4-57a	555	1.762	2.534	0.047	0.2089	0.0027	0.48478	1282	13	1223	15	1378	34	1378	34	11.2482	Core
L4-58a	265	2.584	0.968	0.028	0.1116	0.0018	0.33372	684	15	682	11	675	61	682	11	0.292398
L4-59a	1050	7.87	3.082	0.038	0.2467	0.0027	0.67339	1426.8	9.4	1423	14	1438	19	1438	19	1.04312
L4-60a	821	1.048	0.383	0.0099	0.05195	0.00086	0.37461	328.4	7.2	326.4	5.2	344	56	326.4	5.2	0.609013
L4-61a	1120	1.596	0.547	0.011	0.071	0.0011	0.3105	442.3	7	442.3	6.8	440	46	442.3	6.8	0
L4-62a	90.6	1.328	0.765	0.035	0.0956	0.0018	0.13006	573	21	588	11	487	99	588	11	2.6178
L4-63a	649	4.11	0.454	0.014	0.0597	0.0012	0.31528	378	10	373.5	7.3	408	70	373.5	7.3	1.19048
L4-64a	485	16.6	0.85	0.11	0.1	0.01	0.91429	619	61	611	61	650	120	611	61	1.29241	Rim
L4-64a	81.6	1.532	3.92	0.11	0.2805	0.0054	0.28737	1612	23	1592	27	1638	56	1638	56	2.8083	Core
L4-65a	525	1.181	0.499	0.014	0.0655	0.0011	0.31212	409.8	9.6	408.8	6.7	407	61	408.8	6.7	0.244021
L4-66a	226.3	1.284	6.795	0.093	0.3908	0.0042	0.42895	2083	12	2128	19	2043	24	2043	24	4.16055
L4-67a	621	1.884	0.386	0.011	0.05363	0.00071	0.34896	330.9	7.8	336.7	4.3	300	58	336.7	4.3	1.7528		euhedral
L4-68a	1090	14	1.497	0.04	0.1549	0.0033	0.62758	932	18	928	19	933	50	933	50	0.535906
L4-69a	493	17.9	1.747	0.027	0.1715	0.002	0.34711	1025	10	1020	11	1040	33	1040	33	1.92308
L4-70a	503	1.052	4.08	0.17	0.2934	0.0098	0.81917	1646	34	1657	49	1638	46	1638	46	1.15995
L4-71a	270.7	0.973	0.829	0.024	0.0992	0.0015	0.18627	610	13	609.6	8.6	602	65	609.6	8.6	0.0655738
L4-72a	277.2	1	0.835	0.025	0.0969	0.0014	0.20502	614	14	596.1	8.5	662	66	596.1	8.5	2.91531
L4-73a	611	1.995	2.026	0.034	0.1906	0.0024	0.53716	1122	11	1124	13	1118	29	1118	29	0.536673
L4-74a	1024	6.6	1.844	0.049	0.1686	0.0034	0.7815	1059	18	1004	19	1188	44	1188	44	15.4882	Rim
L4-74a	246	2.274	2.84	0.11	0.2233	0.0044	0.32062	1362	30	1299	23	1450	77	1450	77	10.4138	Core
L4-75a	383	2.893	0.34	0.012	0.04647	0.00076	0.095919	295.8	9	292.8	4.7	325	78	292.8	4.7	1.0142
L4-76a	930	51.4	0.385	0.016	0.0528	0.0011	0.53361	330	12	331.5	7	306	78	331.5	7	0.454545	Rim
L4-76a	366.1	1.78	8.1	0.1	0.3643	0.005	0.32996	2242	11	2002	24	2474	26	2474	26	19.0784	Core
L4-77a	155	4.76	1.805	0.094	0.1764	0.0063	0.59767	1041	34	1046	35	1051	76	1051	76	0.475737
L4-78a	194	1.241	5.27	0.1	0.3157	0.0048	0.55158	1860	17	1767	24	1975	30	1975	30	10.5316
L4-79a	71.7	2.326	2.5	0.074	0.2132	0.0043	0.22969	1268	22	1247	22	1317	62	1317	62	5.31511
L4-80a	984	83.7	0.428	0.012	0.05709	0.00078	0.56311	361.7	9	357.9	4.8	375	53	357.9	4.8	1.05059
L4-81a	192	2.598	2.53	0.064	0.2163	0.0036	0.53366	1276	18	1262	19	1305	46	1305	46	3.29502
L4-82a	805	25.1	0.515	0.03	0.0685	0.0036	0.55536	421	20	427	21	390	130	427	21	1.42518	Rim
L4-82a	44.8	0.413	5.64	0.27	0.3424	0.0095	0.25712	1913	41	1896	46	1933	86	1933	86	1.91412	Core
L4-83a	690	1.366	0.512	0.012	0.0656	0.0011	0.46893	419.9	8.3	409.5	6.3	478	43	409.5	6.3	2.47678		euhedral
L4-84a	203	1.389	13.02	0.17	0.5139	0.0061	0.54299	2679	13	2672	26	2688	20	2688	20	0.595238
L4-85a	470	1.408	0.622	0.018	0.0796	0.0016	0.33385	490	12	493.8	9.4	470	70	493.8	9.4	0.77551
L4-86a	3370	22	1.332	0.079	0.136	0.011	0.63245	856	34	819	63	1020	100	819	63	4.32243
L4-87a	160.2	4.22	1.501	0.042	0.157	0.0026	0.28832	928	17	939	14	891	60	891	60	5.38721
L4-88a	174.5	1.494	1.847	0.058	0.1819	0.005	0.46235	1059	20	1075	27	1009	57	1009	57	6.54113
L4-89a	562	8.6	0.63	0.032	0.0776	0.0033	0.38857	495	20	482	20	560	120	482	20	2.62626	Rim
L4-89a	195	2.195	0.949	0.038	0.1088	0.0021	0.16017	674	19	666	12	684	89	666	12	1.18694	Core
L4-90a	355	2.17	0.55	0.053	0.0697	0.0057	0.47897	442	35	434	34	480	200	434	34	1.80995
L4-91a	603	2.78	1.946	0.038	0.1725	0.0028	0.59427	1095	13	1026	16	1249	34	1249	34	17.8543		euhedral
L4-92a	350	1.882	0.648	0.022	0.0802	0.0017	0.33401	505	14	497	10	526	73	497	10	1.58416
L4-93a	129	0.567	2.54	0.068	0.219	0.0039	0.37265	1278	20	1275	20	1300	50	1300	50	1.92308
L4-98a	209	7.87	1.834	0.092	0.1499	0.0052	0.96922	909	30	880	28	955	36	955	36	7.8534
L4-94a	411	1.299	4.356	0.075	0.3018	0.0053	0.68493	1701	14	1699	26	1708	25	1708	25	0.526932
L4-95a	486	1.603	0.752	0.019	0.0915	0.0019	0.62111	569	11	566	11	582	48	566	11	0.527241
L4-96a	607	19.6	0.436	0.013	0.05993	0.00094	0.25289	366.4	9.4	375.1	5.7	298	65	375.1	5.7	2.37445
L4-97a	241.7	1.191	5.21	0.1	0.3099	0.0065	0.48914	1851	17	1739	32	1979	36	1979	36	12.1273
L4-98a	172	0.955	1.012	0.036	0.1145	0.0033	0.45349	705	18	698	19	723	74	698	19	0.992908
L4-99a	303	1.661	2.631	0.058	0.2246	0.0044	0.69517	1307	16	1305	23	1306	38	1306	38	0.0765697
L4-100a	681	6.32	1.461	0.038	0.143	0.003	0.34385	913	16	861	17	1028	55	1028	55	16.2451	Rim
L4-100a	416	2.151	2.376	0.072	0.1894	0.0042	0.59407	1234	22	1118	23	1434	47	1434	47	22.0363	Core
L4-101a	627	2.159	0.794	0.015	0.0938	0.0015	0.38831	592.5	8.4	578	9	626	43	578	9	2.44726
L4-102a	243	1.122	0.518	0.02	0.0671	0.0014	0.25917	422	13	418.7	8.7	406	81	418.7	8.7	0.781991
L4-103a	446	1.072	0.699	0.024	0.0825	0.0018	0.2579	536	14	511	11	627	79	511	11	4.66418
L4-104a	144.7	2.766	0.521	0.026	0.0657	0.0017	0.25914	425	18	410	11	470	110	410	11	3.52941
L4-105a	368	4.5	0.505	0.022	0.0629	0.0021	0.51923	414	14	393	12	517	81	393	12	5.07246
L4-106a	591	2.6	1.953	0.072	0.1866	0.0075	0.72497	1096	25	1101	41	1081	56	1081	56	1.85014
L4-107a	702	2.62	4.35	0.25	0.273	0.013	0.7998	1690	47	1553	63	1846	55	1846	55	15.8722
L4-108a	657	2.8	0.945	0.019	0.1096	0.0016	0.45538	674.2	9.8	670.4	9.6	674	42	670.4	9.6	0.563631
L4-109a	575	5.99	0.347	0.012	0.0472	0.001	0.26079	301.6	8.9	297.4	6.1	315	72	297.4	6.1	1.39257
L4-110a	94.7	10.7	2.086	0.072	0.1932	0.0049	0.45402	1136	24	1137	27	1111	67	1111	67	2.34023
L4-111a	430	2.51	0.441	0.045	0.0534	0.0046	0.47885	368	31	335	28	580	190	335	28	8.96739
L4-112a	359	1.42	0.782	0.02	0.0934	0.0014	0.1332	585	11	576.4	7.8	609	56	576.4	7.8	1.47009
L4-113a	365	3.7	2.068	0.043	0.1938	0.0029	0.53352	1138	14	1142	16	1116	36	1116	36	2.32975
L4-114a	1630	0.663	0.855	0.019	0.0916	0.0017	0.72952	625	10	565	10	841	33	565	10	9.6
L4-115a	158	1.357	0.881	0.037	0.103	0.0026	0.23766	636	19	631	15	620	92	631	15	0.786164
L4-116a	310	2.47	0.653	0.027	0.0826	0.0024	0.51161	506	16	511	14	447	76	511	14	0.988142
L4-117a	626	11.76	1.874	0.037	0.177	0.0032	0.49917	1071	13	1050	18	1098	38	1098	38	4.37158
L4-118a	534	1.23	2.464	0.088	0.2138	0.0082	0.47661	1262	24	1247	43	1251	74	1251	74	0.319744
L4-119a	183.9	0.669	0.903	0.034	0.1069	0.0021	0.3205	648	18	654	12	588	77	654	12	0.925926
L4-120a	132	1.177	0.835	0.036	0.1012	0.0021	0.12351	613	20	621	12	549	94	621	12	1.30506
L4-121a	132.4	1.711	0.697	0.041	0.0865	0.004	0.32346	532	25	534	23	490	120	534	23	0.37594
L4-122a	900	2.77	0.534	0.023	0.0604	0.0024	0.74377	431	15	377	15	740	64	377	15	12.529
L4-123a	221.6	3.18	0.771	0.042	0.0937	0.0028	0.087117	576	24	577	16	540	120	577	16	0.173611
L4-124a	443	7.31	4.802	0.074	0.3213	0.005	0.63897	1783	13	1795	25	1757	25	1757	25	2.16278
L4-125a	238	1.112	0.809	0.034	0.0961	0.0021	0.35066	599	18	591	12	602	85	591	12	1.33556
L4-126a	357	0.5281	5.727	0.096	0.3465	0.005	0.33624	1933	15	1917	24	1944	33	1944	33	1.38889
L4-127a	105.4	3.14	2.086	0.086	0.1811	0.0061	0.45339	1131	29	1070	33	1240	81	1240	81	13.7097
L4-128a	364	2.227	0.942	0.027	0.1124	0.0027	0.44425	671	14	686	15	601	66	686	15	2.23547
L4-129a	169	2.051	5.91	0.17	0.3171	0.0082	0.63183	1956	25	1779	38	2138	42	2138	42	16.7914
L4-130a	247.5	0.922	0.811	0.024	0.0961	0.0023	0.36786	600	14	591	13	603	66	591	13	1.5
L4-131a	753	2.6	0.662	0.018	0.0834	0.0018	0.50015	514	11	516	11	490	54	516	11	0.389105
L4-132a	139.5	1.147	1.891	0.065	0.1801	0.0041	0.35309	1071	23	1067	22	1061	72	1061	72	0.565504
L4-133a	1054	7.9	0.403	0.011	0.0541	0.0011	0.5731	343.2	7.9	339.3	6.7	348	51	339.3	6.7	1.13636
L4-134a	899	2.13	0.403	0.016	0.0546	0.0016	0.37066	343	12	342.7	9.8	341	84	342.7	9.8	0.0874636
L4-135a	265	2.36	4.94	0.15	0.325	0.0083	0.49802	1806	25	1813	40	1786	42	1786	42	1.51176
L4-136a	221	4.68	5.51	0.16	0.328	0.01	0.52852	1898	25	1824	50	1988	52	1988	52	8.2495
L4-137a	239	2.379	0.44	0.023	0.0578	0.0019	0.37767	367	16	362	12	390	100	362	12	1.3624
L4-138a	498	2.091	0.847	0.032	0.1017	0.0037	0.59231	620	18	623	22	607	75	623	22	0.483871
L4-139a	683	1.74	0.949	0.025	0.1111	0.0021	0.35746	675	13	679	12	660	61	679	12	0.592593
L4-140a	306	0.825	0.669	0.023	0.0827	0.0015	0.26898	518	14	512.1	8.6	553	75	512.1	8.6	1.139
Sample: L5				Isotopic ratios								Isotopic ages (Ma)
Grain #	[U] ppm	U/Th	207/235	2σ error	206/238	2σ error	RHO	207/235	2σ error	206/238	2σ error	207/206	2σ error	Best age	2σ error	% Discordance*	Rim/Core
L5_1	340	1.357	0.812	0.022	0.1001	0.0016	0.21092	603	13	614.9	9.5	533	62	614.9	9.5	1.97347
L5_2	261	1.51	5.78	0.27	0.324	0.019	0.68428	1932	41	1800	94	2089	80	2089	80	13.8344
L5_3	311	3.43	2.88	0.076	0.2293	0.0044	0.56902	1373	20	1330	23	1424	43	1424	43	6.60112
L5_4	869	20	0.89	0.11	0.0996	0.0096	0.71311	643	57	611	57	750	160	611	57	4.97667	Rim
L5_4	190	6.22	5.74	0.15	0.3246	0.0081	0.54484	1934	23	1811	40	2055	44	2055	44	11.8735	Core
L5_5	861	6.17	1.992	0.093	0.1871	0.0089	0.71232	1105	31	1103	48	1116	79	1116	79	1.16487	Rim
L5_5	515	3.16	2.794	0.073	0.2354	0.0057	0.57452	1351	20	1362	30	1318	46	1318	46	3.33839	Core
L5_6	262	1.74	0.771	0.029	0.095	0.0024	0.37412	579	17	584	14	534	81	584	14	0.863558
L5_7	552	2.168	0.535	0.017	0.0702	0.0014	0.44449	433	11	437	8.7	373	65	437	8.7	0.923788
L5_8	307	27.2	1.024	0.029	0.1143	0.0023	0.36682	713	15	697	13	716	64	697	13	2.24404
L5_9	76.5	1.158	3.79	0.1	0.2782	0.0073	0.38109	1590	23	1580	37	1588	60	1588	60	0.503778
L5_10	746	1.563	0.428	0.011	0.05558	0.00089	0.39131	360.6	8	348.6	5.4	410	55	348.6	5.4	3.32779
L5_11	49.2	1.19	2.91	0.14	0.2162	0.0073	0.36742	1365	36	1258	39	1496	94	1496	94	15.9091
L5_12	143	1.223	0.934	0.034	0.1077	0.0021	0.25611	667	17	659	12	651	77	659	12	1.1994
L5_13	947	2.9	0.4087	0.0089	0.05538	0.00069	0.32045	347.3	6.4	347.4	4.2	323	48	347.4	4.2	0.0287936
L5_14	505	4.65	0.919	0.021	0.1065	0.0018	0.34028	661	11	652	10	664	51	652	10	1.36157
L5_15	318	3.47	0.641	0.02	0.0794	0.0016	0.29997	501	13	492.5	9.5	504	69	492.5	9.5	1.69661
L5_16	515	1.62	0.607	0.02	0.0784	0.0014	0.26667	483	12	486.3	8.4	420	77	486.3	8.4	0.68323	Rim
L5_16	221	1.7	0.696	0.035	0.0866	0.0028	0.44009	533	21	535	16	470	100	535	16	0.375235	Core
L5_17	720	8.7	0.51	0.02	0.0678	0.0014	0.37668	415	13	422.5	8.5	366	78	422.5	8.5	1.80723
L5_18	302	1.3	0.775	0.024	0.0949	0.0017	0.25185	580	13	584.3	9.7	528	65	584.3	9.7	0.741379
L5_19	703	9.44	4.042	0.088	0.2889	0.006	0.55398	1638	18	1634	30	1641	40	1641	40	0.426569
L5_20	1320	1.81	0.792	0.016	0.0966	0.0017	0.54244	592.5	8.9	594	10	560	41	594	10	0.253165
L5_21	317	3.32	0.65	0.035	0.0747	0.0035	0.33513	505	22	464	21	620	120	464	21	8.11881	Rim
L5_21	283.5	1.466	1.271	0.084	0.1341	0.0049	0.63919	828	38	811	28	840	120	811	28	2.05314	Core
L5_22	95.1	-2.8	0.871	0.045	0.1039	0.0027	0.37031	634	24	637	16	578	97	637	16	0.473186
L5_23	414	6.83	0.535	0.06	0.0685	0.0048	0.86967	431	40	427	29	500	190	427	29	0.928074	Rim
L5_23	943	3.58	1.413	0.052	0.1343	0.005	0.77437	892	22	811	28	1088	52	811	28	9.08072	Core
L5_24	927	2.75	1.77	0.076	0.173	0.0061	0.75192	1032	28	1028	34	1031	65	1031	65	0.29098	Rim
L5_24	511	0.974	2.221	0.047	0.2038	0.0031	0.45101	1185	15	1195	16	1145	39	1145	39	4.36681	Core
L5_25	85.7	3.07	0.651	0.035	0.0826	0.0024	0.25236	501	22	511	14	440	110	511	14	1.99601
L5_26	107.3	1.259	0.777	0.037	0.0939	0.0021	0.07503	577	21	578	12	520	100	578	12	0.17331
L5_27	1023	121	0.418	0.019	0.0576	0.0019	0.62613	354	14	361	11	314	84	361	11	1.9774	Rim
L5_27	88	2.42	0.603	0.058	0.0768	0.0043	0.09003	481	41	477	25	490	230	477	25	0.831601	Core
L5_28	611	4.89	4.06	0.12	0.2866	0.0071	0.62606	1644	24	1623	36	1653	45	1653	45	1.81488
L5_29	341	1.687	22.96	0.47	0.576	0.012	0.59033	3222	20	2928	49	3406	26	3406	26	14.0341
L5_30	148.5	0.615	0.909	0.047	0.1069	0.0033	0.44305	649	25	654	19	600	110	654	19	0.770416
L5_31	270	0.727	4.857	0.073	0.3196	0.0043	0.48023	1794	13	1787	21	1794	27	1794	27	0.39019
L5_32	330	1.477	0.549	0.017	0.0725	0.0011	0.040718	444	11	451.3	6.6	378	71	451.3	6.6	1.64414
L5_33	338	1.21	3.847	0.096	0.2674	0.0063	0.67127	1597	20	1525	32	1694	39	1694	39	9.97639
L5_34	205.1	3.096	2.376	0.06	0.2051	0.004	0.52585	1230	18	1202	21	1280	44	1280	44	6.09375
L5_35	187	4.42	0.697	0.034	0.0849	0.0029	0.417	530	20	525	17	524	93	525	17	0.943396
L5_36	120.5	2.84	2.135	0.064	0.1989	0.0034	0.33896	1154	20	1169	18	1109	57	1109	57	5.41028
L5_37	496	0.435	0.864	0.034	0.0988	0.0028	0.55789	630	18	607	16	689	73	607	16	3.65079
L5_39	179	1.79	0.942	0.056	0.106	0.0034	0.47151	669	29	649	20	760	120	649	20	2.98954
L5_40	287	3.27	6.47	0.18	0.3431	0.0088	0.72082	2038	24	1900	42	2146	37	2146	37	11.4632
L5_41	106.4	1.413	0.844	0.065	0.1007	0.0034	0.26857	615	36	618	20	560	160	618	20	0.487805
L5_42	423	2.62	0.447	0.017	0.0597	0.0018	0.4328	375	12	374	11	365	77	374	11	0.266667
L5_43	597	1.17	0.56	0.022	0.073	0.0025	0.59296	448	14	454	15	421	72	454	15	1.33929
L5_44	92.7	3.81	0.694	0.047	0.0875	0.0045	0.43902	523	27	539	27	490	120	539	27	3.05927
L5_45	441	1.651	0.337	0.017	0.0462	0.0017	0.28281	296	13	291	11	310	110	291	11	1.68919	Rim
L5_45	545	1.994	1.724	0.06	0.1687	0.0051	0.59115	1016	22	1004	28	1027	62	1027	62	2.23953	Core
L5_46	505	3.03	0.766	0.027	0.0969	0.0031	0.56663	575	16	596	18	495	64	596	18	3.65217	Rim
L5_46	295	4.24	1.094	0.05	0.1188	0.0035	0.61038	747	25	723	20	797	80	723	20	3.21285	Core
L5_47	390	9.07	0.53	0.018	0.0705	0.001	0.12205	430	12	438.8	6.1	369	71	438.8	6.1	2.04651
L5_48	452	5.4	0.51	0.014	0.0676	0.0013	0.40299	417	9.6	421.2	7.7	385	60	421.2	7.7	1.00719
L5_49	352	2.6	0.772	0.027	0.0955	0.0029	0.53152	577	16	587	17	554	66	587	17	1.7331
L5_50	421	0.93	0.429	0.012	0.05763	0.00097	0.3056	361.3	8.8	361.1	5.9	339	62	361.1	5.9	0.0553557
L5_51	302	5.9	1.053	0.046	0.1198	0.0037	0.44373	725	23	729	21	700	88	729	21	0.551724	Rim
L5_51	311.4	1.543	1.217	0.046	0.1346	0.0043	0.58873	806	21	813	25	771	67	813	25	0.868486	Core
L5_52	569	5.3	0.451	0.022	0.06	0.0028	0.50105	374	15	375	17	368	90	375	17	0.26738		euhedral
L5_53	241	1.09	0.643	0.022	0.0803	0.0016	0.3123	501	14	497.7	9.3	490	71	497.7	9.3	0.658683		euhedral
L5_54	103	2.03	0.999	0.043	0.1108	0.0034	0.39586	699	22	676	20	743	97	676	20	3.29041
L5_55	222	2.44	3.42	0.11	0.2654	0.0082	0.63469	1498	26	1513	42	1453	56	1453	56	4.12939
L5_56	330.1	1.582	3.518	0.086	0.2669	0.007	0.39134	1528	19	1523	36	1529	52	1529	52	0.392413
L5_57	508	15.3	0.503	0.04	0.0641	0.0056	0.48392	411	27	400	34	500	170	400	34	2.6764	Rim
L5_57	377	1.05	1.159	0.033	0.1273	0.0028	0.54021	779	15	772	16	795	51	772	16	0.898588	Core
L5_58	511	2.03	0.406	0.012	0.05626	0.00089	0.2947	345.7	8.8	352.8	5.4	297	65	352.8	5.4	2.0538
L5_59	538	1.08	0.446	0.013	0.0604	0.0013	0.51124	373.3	9	377.6	7.6	340	56	377.6	7.6	1.15189
L5_60	393	1.272	3.159	0.063	0.2491	0.0046	0.51844	1444	15	1433	24	1456	36	1456	36	1.57967
L5_61	330	1.427	4.03	0.15	0.2785	0.0094	0.65546	1625	32	1578	47	1673	55	1673	55	5.67842
L5_62	171.9	1.449	2.793	0.065	0.229	0.0044	0.33145	1351	18	1328	23	1376	50	1376	50	3.48837
L5_63	626	2.79	0.347	0.018	0.0471	0.0024	0.48472	300	14	296	15	373	98	296	15	1.33333		euhedral
L5_64	487	2.379	3.24	0.071	0.2571	0.0045	0.64946	1468	18	1477	22	1446	36	1446	36	2.14385
L5_65	232	0.972	4.27	0.13	0.2843	0.0062	0.74253	1686	25	1612	31	1772	37	1772	37	9.02935
L5_66	447	0.834	0.577	0.021	0.0746	0.0015	0.30522	462	14	463.8	8.8	430	81	463.8	8.8	0.38961
L5_67	276	0.951	0.391	0.02	0.0542	0.0013	0.13235	332	14	340.2	7.6	270	100	340.2	7.6	2.46988		euhedral
L5_68	37.6	0.61	10.16	0.38	0.394	0.013	0.65563	2437	35	2137	61	2705	49	2705	49	20.9982
L5_69	160.3	1.21	0.758	0.032	0.0965	0.0021	0.46613	568	18	593	12	463	77	593	12	4.40141
L5_70	281.4	2.46	0.807	0.025	0.0985	0.0028	0.61087	598	14	605	16	561	57	605	16	1.17057		euhedral
L5_71	740	43.3	0.405	0.015	0.0566	0.0033	0.42479	344	11	355	20	310	110	355	20	3.19767	Rim
L5_71	1160	2.39	0.704	0.029	0.0846	0.0037	0.73335	543	16	523	22	597	64	523	22	3.68324	Core
L5_72	626	1.766	0.369	0.011	0.051	0.001	0.33926	318.1	7.8	320.5	6.3	302	62	320.5	6.3	0.75448
L5_73	43.2	1.458	2.48	0.11	0.208	0.0059	0.39272	1255	32	1216	31	1313	82	1313	82	7.38766
L5_74	129	1.03	0.489	0.025	0.067	0.0019	0.32631	400	17	418	12	296	99	418	12	4.5
L5_75	376	0.926	0.57	0.017	0.0752	0.0017	0.60476	456	11	467	10	409	56	467	10	2.41228
L5_76	323	4.4	0.76	0.032	0.0928	0.0027	0.53825	571	19	572	16	548	80	572	16	0.175131
L5_77	34.2	1.29	1.95	0.11	0.1806	0.008	0.37476	1078	37	1066	44	1100	110	1100	110	3.09091
L5_78	440	10.67	0.679	0.021	0.085	0.0022	0.56031	524	13	526	13	496	60	526	13	0.381679
L5_79	102.4	0.519	7.1	0.19	0.374	0.01	0.58724	2119	24	2043	47	2189	42	2189	42	6.66971
L5_80	353	1.32	0.556	0.018	0.0738	0.0015	0.36999	447	11	458.8	8.9	363	65	458.8	8.9	2.63982		euhedral
L5_81	565	5.33	0.397	0.013	0.0542	0.0013	0.42679	337.9	9.2	340.3	7.9	324	64	340.3	7.9	0.710269
L5_82	139.6	0.7	0.632	0.027	0.0821	0.002	0.28883	494	17	508	12	400	88	508	12	2.83401
L5_83	187.1	0.739	0.838	0.03	0.0997	0.0027	0.43359	614	17	612	16	603	74	612	16	0.325733
L5_84	202	0.789	5.27	0.15	0.3334	0.009	0.69614	1858	24	1852	43	1856	43	1856	43	0.215517
L5_85	181	1.56	0.906	0.03	0.1107	0.0031	0.4251	651	16	676	18	541	76	676	18	3.84025
L5_86	149.8	1.586	2.44	0.072	0.2159	0.005	0.57613	1251	22	1259	27	1219	50	1219	50	3.28138
L5_87	49	2.9	1.206	0.08	0.1284	0.0056	0.3361	783	36	781	33	770	130	781	33	0.255428
L5_88	84.2	0.644	3.76	0.13	0.2775	0.0081	0.34448	1580	27	1577	41	1555	70	1555	70	1.41479
L5_89	181	1.201	3.49	0.07	0.2721	0.0042	0.46559	1525	16	1550	21	1458	37	1458	37	6.31001
L5_90	567	13.8	0.97	0.11	0.112	0.011	0.88771	682	57	682	66	670	110	682	66	0	Rim
L5_90	507	4.83	1.738	0.047	0.1688	0.0045	0.66471	1019	18	1004	25	1038	47	1038	47	3.27553	Core
L5_91	523	1.007	0.558	0.017	0.0725	0.0018	0.56059	448	11	451	11	396	59	451	11	0.669643
L5_92	693	1.086	0.471	0.01	0.06343	0.00091	0.22685	391.3	7.2	396.4	5.5	329	52	396.4	5.5	1.30335
L5_93	439	5.58	0.804	0.027	0.0955	0.0024	0.45346	601	16	588	14	600	71	588	14	2.16306
L5_94	527	1.814	0.385	0.013	0.052	0.0014	0.40964	330.6	9.9	326.5	8.5	311	71	326.5	8.5	1.24017
L5_95	162.6	1.649	0.774	0.03	0.0948	0.0021	0.41823	577	17	584	13	505	75	584	13	1.21317
L5_96	107.8	1.18	3.08	0.12	0.2371	0.0071	0.55371	1417	29	1375	38	1441	63	1441	63	4.58015
L5_97	386	6.33	0.956	0.03	0.1103	0.0026	0.49052	678	15	677	16	636	61	677	16	0.147493
L5_98	1499	41.1	0.401	0.019	0.0537	0.002	0.63675	342	14	337	12	342	89	337	12	1.46199	Rim
L5_98	428	0.701	0.621	0.022	0.0785	0.0018	0.51808	490	15	487	11	464	70	487	11	0.612245	Core
L5_99	143	1.9	2.219	0.073	0.2002	0.0057	0.42896	1179	23	1179	31	1152	61	1152	61	2.34375
L5_100	305	3	1.961	0.059	0.1886	0.0042	0.42415	1097	20	1113	23	1030	57	1030	57	8.05825
L5_101	314	1.657	0.548	0.018	0.0711	0.0014	0.3532	442	12	442.8	8.2	392	65	442.8	8.2	0.180995
L5_102	487	2.59	3.261	0.045	0.2525	0.0034	0.40457	1470	11	1451	18	1471	30	1471	30	1.35962
L5_103	523	3.89	2.73	0.1	0.2364	0.0093	0.65592	1332	28	1362	48	1247	65	1247	65	9.22213
L5_104	218	8	0.94	0.089	0.1077	0.0081	0.65764	666	47	658	47	670	160	658	47	1.2012
L5_105	431	36	1.788	0.07	0.1751	0.0066	0.48306	1045	29	1039	36	1024	84	1024	84	1.46484	Rim
L5_105	114.5	1.099	2.863	0.092	0.2401	0.0053	0.31485	1367	24	1386	28	1308	66	1308	66	5.9633	Core
L5_106	136	0.616	0.743	0.034	0.09	0.0024	0.34118	558	19	555	14	550	100	555	14	0.537634
L5_107	206	1.213	2.77	0.11	0.2229	0.0073	0.58668	1339	30	1295	39	1385	60	1385	60	6.49819
L5_108	428	1.772	0.439	0.016	0.0601	0.002	0.48269	368	11	376	12	316	73	376	12	2.17391		euhedral
L5_109	147	1.46	0.824	0.035	0.0982	0.0023	0.34152	604	20	603	14	584	91	603	14	0.165563
L5_110	146	2.137	2.55	0.067	0.2209	0.0052	0.56876	1284	20	1285	28	1276	49	1276	49	0.705329
L5_111	870	2.88	0.501	0.012	0.0658	0.0012	0.23414	411.3	8.2	410.6	7.2	413	58	410.6	7.2	0.170192
L5_112	259	4.6	0.528	0.044	0.0669	0.0041	0.5583	427	29	417	25	480	150	417	25	2.34192	Rim
L5_112	617	1.66	1.77	0.089	0.1718	0.0069	0.715	1031	33	1021	38	1053	75	1053	75	3.03894	Core
L5_113	470	1.85	2.565	0.077	0.2027	0.0061	0.65088	1286	22	1188	33	1427	50	1427	50	16.7484
L5_114	389	1.714	1.731	0.043	0.1727	0.0038	0.58175	1020	16	1026	21	999	48	999	48	2.7027
L5_115	908	2.71	0.749	0.023	0.0903	0.0024	0.696	565	13	557	14	606	54	557	14	1.41593
L5_116	596	4.23	0.517	0.026	0.0684	0.0031	0.31716	421	18	426	19	410	110	426	19	1.18765	Rim
L5_116	305	2.57	1.99	0.13	0.1657	0.0076	0.80322	1106	43	988	42	1343	73	1343	73	26.4334	Core
L5_117	549	0.787	0.529	0.025	0.0699	0.0019	0.36973	429	17	435	12	401	95	435	12	1.3986	Rim
L5_117	217	0.705	0.6	0.027	0.076	0.0016	0.18844	475	17	472	9.6	470	100	472	9.6	0.631579	Core
L5_118	893	1.689	1.774	0.06	0.171	0.0042	0.72736	1033	22	1017	23	1081	48	1081	48	5.92044
L5_119	587	0.706	0.37	0.013	0.0507	0.0012	0.44899	318.3	9.7	318.5	7.4	327	69	318.5	7.4	0.0628338
L5_120	318.2	0.565	0.489	0.018	0.0637	0.0015	0.28449	402	12	398.2	9.2	424	75	398.2	9.2	0.945274
L5_121	66.9	2.147	0.527	0.031	0.0688	0.0017	0.084983	423	20	429	10	390	120	429	10	1.41844
L5_122	194	1.242	0.78	0.037	0.0937	0.0035	0.52861	578	21	576	21	598	87	576	21	0.346021
L5_123	142	0.884	0.78	0.035	0.0887	0.0019	0.28824	579	20	548	11	680	94	548	11	5.35406
L5_124	567	1.155	0.689	0.031	0.0849	0.0034	0.6164	531	18	525	20	577	84	525	20	1.12994
L5_125	303	1.23	0.904	0.033	0.1057	0.0029	0.36119	654	19	647	17	691	82	647	17	1.07034
L5_126	458	6.7	0.519	0.015	0.0681	0.0014	0.44193	425.7	9.9	424.7	8.4	435	57	424.7	8.4	0.234907
L5_127	408	0.658	0.712	0.021	0.0881	0.0021	0.41349	543	13	544	12	522	65	544	12	0.184162
L5_128	507	4.1	0.881	0.025	0.1085	0.0019	0.32605	639	13	664	11	552	62	664	11	3.91236
L5_129	335	1.762	6.05	0.13	0.345	0.0057	0.65385	1981	19	1909	27	2068	29	2068	29	7.68859
L5_130	204	1.423	0.858	0.033	0.1031	0.0022	0.28154	624	18	632	13	600	80	632	13	1.28205
L5_131	123.2	1.56	1.152	0.041	0.1328	0.0025	0.1582	772	19	804	14	679	80	804	14	4.14508
L5_132	836	16.3	0.523	0.022	0.0697	0.0027	0.54104	426	15	434	16	419	90	434	16	1.87793	Rim
L5_132	140	0.983	0.807	0.038	0.0981	0.0023	0.50338	597	22	603	14	580	110	603	14	1.00503	Core
L5_133	960	24.8	0.798	0.083	0.0943	0.0092	0.88088	591	48	580	54	680	100	580	54	1.86125	Rim
L5_133	161	1.189	4.59	0.14	0.3066	0.009	0.82873	1743	28	1722	44	1806	44	1806	44	4.65116	Core
L5_134	200.7	0.966	0.809	0.029	0.0985	0.0023	0.21778	599	16	605	14	587	88	605	14	1.00167
L5_135	555	3.41	5.26	0.12	0.3166	0.0077	0.787	1858	20	1771	38	1985	27	1985	27	10.7809
L5_136	699	14.6	0.867	0.021	0.1026	0.0023	0.5372	632	11	629	14	666	49	629	14	0.474684
L5_137	383	3.75	8.15	0.19	0.4173	0.0092	0.77286	2241	21	2249	41	2264	26	2264	26	0.662544
L5_138	241	0.682	4.261	0.088	0.2918	0.0057	0.53075	1682	17	1649	28	1739	35	1739	35	5.17539
L5_139	51.1	1.913	1.587	0.071	0.1591	0.0034	0.23568	953	27	951	19	939	91	939	91	1.27796
L5_140	294	3.65	0.845	0.021	0.0998	0.0014	0.19022	620	12	613	8	644	56	613	8	1.12903
L5_141	750	11.1	0.527	0.014	0.0703	0.0014	0.49163	428.3	9.4	437.8	8.3	386	54	437.8	8.3	2.21807		euhedral
L5_142	229.4	1.533	1.457	0.037	0.1485	0.0032	0.53521	909	15	892	18	958	47	958	47	6.88935
L5_143	450	9.54	0.398	0.013	0.0541	0.0012	0.34171	339.1	9.4	339.7	7.3	316	69	339.7	7.3	0.176939		euhedral
L5_144	150	0.9	0.557	0.027	0.073	0.0018	0.44165	445	17	454	11	354	85	454	11	2.02247
L5_145	152	1.766	9.64	0.55	0.384	0.017	0.92573	2397	53	2094	81	2626	31	2626	31	20.2589
L5_146	144	1.215	0.853	0.033	0.1047	0.0024	0.35377	626	19	641	14	538	83	641	14	2.39617		euhedral
L5_147	582	2.77	0.565	0.024	0.0734	0.0028	0.50892	457	17	456	17	448	85	456	17	0.218818
L5_148	815	1.484	0.606	0.029	0.0746	0.0025	0.5755	480	19	464	15	532	92	464	15	3.33333	Rim
L5_148	299	0.644	0.917	0.034	0.1061	0.0023	0.41878	658	18	650	14	642	77	650	14	1.21581	Core
Sample: L6				Isotopic ratios								Isotopic ages (Ma)
Grain #	[U] ppm	U/Th	207/235	2σ error	206/238	2σ error	RHO	207/235	2σ error	206/238	2σ error	207/206	2σ error	Best age	2σ error	% Discordance*	Rim/Core
L6-1	530	2.42	0.439	0.019	0.0584	0.002	0.6075	368	14	366	12	364	79	366	12	0.543478		euhedral
L6-2	768	1.366	0.515	0.012	0.0671	0.001	0.53894	420.8	7.8	418.7	6.1	428	41	418.7	6.1	0.499049
L6-3	413	29.2	0.821	0.025	0.0983	0.002	0.42541	607	14	604	12	599	61	604	12	0.494234
L6-4	211.2	0.953	0.818	0.038	0.0918	0.0027	0.32645	603	21	566	16	737	99	566	16	6.13599
L6-5	1051	1.41	0.347	0.02	0.0469	0.0025	0.40409	302	15	295	15	390	130	295	15	2.31788	Rim
L6-5	671	1.684	0.41	0.012	0.0541	0.00097	0.3681	348.1	8.6	339.6	5.9	398	64	339.6	5.9	2.44183	Core
L6-6	312	0.849	0.874	0.023	0.1032	0.0019	0.54357	635	12	633	11	626	49	633	11	0.314961
L6-7	287	0.846	3.552	0.095	0.2558	0.0071	0.54616	1536	21	1467	37	1624	50	1624	50	9.66749
L6-8	1023	1.193	0.526	0.012	0.0677	0.0013	0.42792	428.4	8.2	422.5	7.9	442	50	422.5	7.9	1.37722	Rim
L6-8	345	2.44	0.656	0.074	0.0827	0.0062	0.71785	509	45	512	37	470	170	512	37	0.589391	Core
L6-9	270	0.804	0.61	0.031	0.077	0.0039	0.58777	485	22	478	23	510	100	478	23	1.4433		euhedral
L6-10	402	5.8	0.479	0.013	0.0624	0.001	0.35064	396.2	8.7	390.2	6.1	413	58	390.2	6.1	1.51439
L6-11	316	1.753	3.6	0.13	0.251	0.011	0.71074	1553	30	1439	55	1701	54	1701	54	15.4027
L6-12	678	3.33	0.669	0.02	0.083	0.0019	0.39949	519	12	514	11	523	65	514	11	0.963391
L6-13	660	8.3	2.604	0.075	0.2157	0.0054	0.36154	1299	21	1259	29	1355	58	1355	58	7.08487
L6-14	66.5	0.919	0.637	0.037	0.0785	0.0029	0.30589	496	24	486	17	530	130	486	17	2.01613
L6-15	108.3	2.753	4.213	0.085	0.2872	0.0045	0.41427	1673	17	1627	23	1718	37	1718	37	5.29686
L6-16	655	0.915	4.18	0.085	0.2699	0.0054	0.83365	1668	17	1539	27	1823	21	1823	21	15.5787
L6-17	37.8	0.908	1.805	0.073	0.1785	0.0045	0.17428	1043	27	1057	24	965	95	965	95	9.53368
L6-18	683	8.38	1.686	0.046	0.1657	0.0027	0.60863	1005	16	988	15	1029	44	1029	44	3.98445	Rim
L6-18	214	13.1	7.73	0.23	0.363	0.01	0.47105	2204	24	1995	48	2384	54	2384	54	16.3171	Core
L6-19	425	0.913	0.962	0.021	0.1091	0.0016	0.47688	684	11	667.3	9.5	725	42	667.3	9.5	2.44152
L6-20	437	0.575	0.745	0.025	0.0885	0.0017	0.38214	563	15	546	10	617	66	546	10	3.01954
L6-21	791	2.68	0.422	0.01	0.05666	0.00086	0.36827	356.7	7.3	355.2	5.3	350	52	355.2	5.3	0.420521
L6-22	163	1.589	1.282	0.051	0.1433	0.0033	0.30151	833	23	863	18	732	84	732	18	3.60144
L6-23	273	0.523	0.822	0.023	0.0973	0.0016	0.26851	607	13	599.6	9.8	630	58	599.6	9.8	1.21911
L6-24	657	5.46	0.555	0.046	0.0716	0.0043	0.54661	446	31	445	26	430	160	445	26	0.224215	Rim
L6-24	152	0.702	0.692	0.024	0.0872	0.0015	0.20217	531	15	538.9	8.6	475	76	538.9	8.6	1.48776	Core
L6-25	174	1.21	0.85	0.11	0.1017	0.0048	0.64445	620	61	624	28	680	200	624	28	0.645161	Rim
L6-25	91.6	0.851	1.394	0.054	0.1468	0.0027	0.38902	880	23	882	15	849	74	849	15	0.227273	Core
L6-26	717	1.946	0.73	0.022	0.0907	0.002	0.62935	555	13	560	12	544	57	560	12	0.900901
L6-27	131.1	0.956	2.515	0.051	0.223	0.0027	0.35096	1273	15	1297	14	1234	39	1234	39	5.10535
L6-28	74.6	0.569	1.19	0.1	0.1295	0.008	0.38218	792	43	783	45	810	170	783	45	1.13636
L6-29	361	0.89	0.796	0.033	0.0954	0.0043	0.48534	591	19	586	25	625	91	586	25	0.846024
L6-30	217	0.55	0.806	0.032	0.0973	0.0022	0.29602	597	18	598	13	577	87	598	13	0.167504
L6-31	112	12.7	1.783	0.086	0.1678	0.0064	0.96055	977	34	988	36	969	39	969	39	1.96078	Rim
L6-31	154.7	2.77	2.619	0.054	0.2313	0.0044	0.46755	1305	15	1340	23	1251	42	1251	42	7.11431	Core
L6-32	218.5	1.026	2.576	0.051	0.2263	0.0028	0.38465	1291	15	1315	15	1252	38	1252	38	5.03195
L6-33	714	1.203	0.435	0.011	0.05717	0.00083	0.4017	365.8	7.9	358.3	5	410	52	358.3	5	2.0503		euhedral
L6-34	493	2.59	0.786	0.023	0.0945	0.0015	0.30668	587	13	582.1	8.6	593	63	582.1	8.6	0.834753
L6-35	130.4	0.932	0.738	0.027	0.0918	0.0016	0.17951	560	16	565.9	9.7	514	79	565.9	9.7	1.05357
L6-36	419	3.94	0.698	0.033	0.0857	0.0039	0.12315	534	20	529	23	560	120	529	23	0.93633
L6-37	320	1.245	0.545	0.02	0.0699	0.0019	0.51839	439	13	435	11	465	68	435	11	0.911162
L6-38	245	1.52	1.871	0.065	0.1762	0.0053	0.44165	1067	23	1045	29	1126	66	1126	66	7.19361	Rim
L6-38	487	2.73	2.591	0.073	0.2338	0.0062	0.65515	1296	21	1354	32	1202	45	1202	45	12.6456	Core
L6-39	209.1	0.982	4.526	0.093	0.3049	0.0054	0.47632	1737	16	1714	27	1759	35	1759	35	2.55827
L6-40	530	3.06	0.431	0.013	0.0592	0.0012	0.53458	362.6	9	370.8	7	310	54	370.8	7	2.26145
L6-41	660	0.666	1.483	0.045	0.1471	0.0036	0.67288	921	18	884	20	1005	48	1005	48	12.0398
L6-42	310.8	2.46	0.93	0.027	0.1084	0.0022	0.32119	666	14	663	13	663	64	663	13	0.45045
L6-43	126.6	0.933	4.17	0.1	0.2939	0.005	0.49045	1665	21	1660	25	1677	39	1677	39	1.01371
L6-44	359	1.412	0.466	0.015	0.0612	0.0011	0.28686	389	11	382.9	6.4	428	78	382.9	6.4	1.56812
L6-45	24.5	2.02	3.91	0.15	0.2843	0.0067	0.25674	1605	30	1610	34	1597	70	1597	70	0.814026
L6-46	177	1.243	0.432	0.039	0.0564	0.002	0.30679	361	26	353	12	360	160	353	12	2.21607
L6-47	520	0.778	8.84	0.51	0.357	0.017	0.58161	2314	50	1959	83	2627	86	2627	86	25.4282
L6-1	218.6	1.81	0.983	0.036	0.1056	0.0028	0.65201	691	19	647	16	823	59	647	16	6.36758
L6-2	304	5.23	0.549	0.033	0.0688	0.0032	0.61716	442	21	429	20	510	100	429	20	2.94118
L6-4	400	1.43	0.797	0.04	0.0952	0.0039	0.66825	592	22	585	23	623	81	585	23	1.18243
L6-5	329	0.745	0.759	0.021	0.0928	0.0019	0.45706	571	12	572	11	559	57	572	11	0.175131
L6-6	752	1.082	0.397	0.015	0.0515	0.0016	0.72919	338	11	323.6	9.8	430	55	323.6	9.8	4.26036
L6-7	152.9	1.76	0.569	0.025	0.072	0.0019	0.46661	453	16	448	11	463	82	448	11	1.10375
L6-8	482	1.285	0.48	0.016	0.0617	0.0016	0.54577	397	11	385.5	9.5	442	57	385.5	9.5	2.89673
L6-9	488	1.069	3.89	0.11	0.2738	0.0072	0.8327	1608	22	1558	36	1676	28	1676	28	7.04057
L6-10	157.8	1.147	6.64	0.17	0.3059	0.0074	0.72926	2059	23	1718	37	2422	32	2422	32	29.0669
L6-11	223	1.136	0.743	0.023	0.0923	0.002	0.44533	561	14	569	12	528	60	569	12	1.42602
L6-12	207	1.114	0.649	0.023	0.0807	0.0018	0.43349	505	14	500	11	497	67	500	11	0.990099
L6-13	1180	1.894	0.419	0.018	0.0541	0.002	0.72645	352	13	339	12	443	57	339	12	3.69318
L6-14	944	2.3	4.98	0.15	0.2856	0.0092	0.87194	1810	25	1616	46	2057	25	2057	25	21.439
L6-15	101.3	1.065	0.995	0.036	0.1136	0.0026	0.39248	700	19	693	15	706	74	693	15	1
L6-16	1177	7.01	0.374	0.011	0.0502	0.0013	0.67192	321.8	8.4	315.5	8	364	52	315.5	8	1.95774
L6-17	313	0.929	3.785	0.088	0.2732	0.0065	0.73352	1585	19	1555	33	1629	32	1629	32	4.54266
L6-18	428	3.61	2.69	0.087	0.2299	0.0065	0.79969	1320	24	1332	34	1303	38	1303	38	2.22563
L6-19	523	0.972	9.43	0.25	0.3781	0.0091	0.75109	2373	24	2063	42	2657	29	2657	29	22.356
L6-20	522	0.751	4.46	0.15	0.32	0.01	0.67286	1723	27	1787	50	1642	51	1642	51	8.83069
L6-21	153.7	0.572	0.586	0.024	0.0694	0.0021	0.46628	466	16	432	13	625	85	432	13	7.29614
L6-22	186	0.9	0.84	0.029	0.1009	0.0028	0.5541	615	16	619	16	586	64	619	16	0.650407
L6-23	350	11	0.597	0.017	0.075	0.0018	0.37804	474	11	466	11	518	62	466	11	1.68776
L6-24	124.9	0.938	1.055	0.051	0.1118	0.0032	0.52884	728	24	683	18	833	77	683	18	6.18132
L6-25	353	6.04	0.47	0.017	0.0613	0.0016	0.6025	392	12	383.3	9.6	424	63	383.3	9.6	2.21939
L6-26	747	0.447	0.716	0.038	0.0836	0.0038	0.50802	546	22	517	23	670	110	517	23	5.31136
L6-27	237	0.963	2.498	0.064	0.2058	0.0049	0.67828	1267	19	1205	26	1377	41	1377	41	12.4909
L6-28	155	1.588	3.513	0.094	0.2707	0.0063	0.66155	1524	21	1542	32	1501	38	1501	38	2.73151
L6-29	690	10.1	0.587	0.058	0.0716	0.0062	0.70962	465	38	445	37	580	170	445	37	4.30108	Rim
L6-29	291.9	2.029	3.77	0.15	0.277	0.01	0.75727	1579	32	1572	50	1606	53	1606	53	2.11706	Core
L6-30	409	1.441	2.159	0.05	0.199	0.004	0.70075	1164	16	1169	22	1155	34	1155	34	1.21212
L6-31	71.7	1.117	0.703	0.038	0.0833	0.0022	0.28019	536	23	516	13	580	110	516	13	3.73134
L6-32	56.6	-1.8	0.616	0.032	0.0751	0.0022	0.25156	481	20	467	13	530	110	467	13	2.9106
L6-33	808	2.316	0.446	0.017	0.0571	0.0016	0.67512	373	12	358	10	458	58	358	10	4.02145
L6-34	117.8	0.922	6.12	0.14	0.3591	0.0085	0.63619	1989	21	1974	40	2008	36	2008	36	1.69323
L6-35	194	6.22	2.56	0.093	0.2093	0.0056	0.7327	1280	27	1223	30	1366	47	1366	47	10.4685
L6-37	655	3.57	0.794	0.018	0.0953	0.0021	0.62142	593	11	586	13	617	43	586	13	1.18044
L6-38	288	22.8	1.711	0.042	0.1681	0.0039	0.52825	1009	16	1000	22	1032	45	1032	45	3.10078
L6-39	340	1.221	1.802	0.047	0.1686	0.004	0.68392	1042	17	1003	22	1122	39	1122	39	10.6061
L6-40	341	32.2	0.854	0.031	0.0948	0.0026	0.62528	623	17	583	15	753	62	583	15	6.42055
L6-41	181.5	0.909	14.99	0.62	0.491	0.016	0.89911	2787	45	2562	71	2970	32	2970	32	13.7374
L6-42	406	1.115	0.372	0.037	0.0476	0.0036	0.43229	319	28	300	22	460	210	300	22	5.95611	Rim
L6-42	175.3	0.53	0.655	0.032	0.0796	0.0023	0.55935	508	20	493	14	555	88	493	14	2.95276	Core
L6-43	305	0.971	0.433	0.017	0.0568	0.0018	0.51752	363	12	356	11	395	79	356	11	1.92837
L6-44	301	0.761	0.808	0.026	0.0961	0.0027	0.60939	600	15	591	16	619	57	591	16	1.5
L6-45	253	1.974	3.74	0.12	0.268	0.0074	0.79835	1572	25	1527	37	1642	36	1642	36	7.00365
L6-46	330	1.548	1.659	0.045	0.1649	0.004	0.61358	989	17	983	22	997	47	997	47	1.40421
L6-47	415	1.313	1.394	0.058	0.1417	0.005	0.72837	881	25	853	28	945	61	945	61	9.73545
L6-48	676	2.71	0.595	0.016	0.0755	0.0018	0.70985	473	10	469	11	477	52	469	11	0.845666		euhedral
L6-50	437	3.99	0.579	0.02	0.0691	0.0018	0.42915	461	12	431	11	599	68	431	11	6.50759
L6-51	381	0.864	0.511	0.014	0.0653	0.0017	0.45277	417.6	9.6	408	10	457	61	408	10	2.29885		euhedral
L6-52	90.3	0.805	1.461	0.049	0.1449	0.0038	0.50517	908	20	874	22	969	65	969	65	9.80392
L6-53	822	1.9	0.802	0.025	0.0962	0.0035	0.71466	595	14	594	21	614	54	594	21	0.168067
L6-54	662	1.037	0.831	0.026	0.0983	0.0028	0.62263	611	14	604	16	630	56	604	16	1.14566
L6-55	1000	1.143	0.503	0.014	0.0655	0.0015	0.73251	412.1	9.2	409	9.1	414	44	409	9.1	0.752245
L6-56	277	0.585	0.424	0.028	0.0539	0.0023	0.44478	357	20	338	14	500	130	338	14	5.32213
L6-57	756	1.29	4.43	0.2	0.2633	0.0098	0.65533	1706	39	1513	53	1919	68	1919	68	21.1569
L6-58	176	1.302	0.428	0.02	0.0552	0.0015	0.46255	359	14	346.2	9.2	414	88	346.2	9.2	3.56546
L6-59	183	16.2	1.679	0.051	0.1718	0.0044	0.60675	995	20	1021	24	927	57	927	57	10.1402
L6-60	351	7.11	0.476	0.017	0.0621	0.0018	0.68244	393	12	388	11	412	57	388	11	1.27226
L6-61	110	1.262	5.32	0.14	0.3028	0.0072	0.53836	1866	22	1703	35	2047	45	2047	45	16.8051
L6-62	122.8	1.99	0.916	0.041	0.1051	0.0039	0.51795	653	22	643	23	686	90	643	23	1.53139
L6-63	187.6	1.096	6.89	0.16	0.3708	0.0075	0.73692	2091	21	2031	35	2144	28	2144	28	5.27052
L6-64	100	1.058	0.854	0.04	0.0974	0.0027	0.34746	622	22	598	16	670	94	598	16	3.85852
L6-65	262	0.829	0.72	0.027	0.0862	0.0022	0.58627	548	16	533	13	582	70	533	13	2.73723
L6-66	869	1.245	0.361	0.013	0.0487	0.0017	0.56595	313	10	306	10	364	50	306	10	2.23642
L6-67	830	0.558	0.408	0.024	0.0526	0.0027	0.36987	347	17	330	17	450	140	330	17	4.89914
L6-69	208	0.785	1.505	0.042	0.1512	0.0034	0.64855	928	17	907	19	959	46	959	46	5.42231
L6-70	413	3.52	0.496	0.015	0.0643	0.0017	0.60327	407	10	401	10	431	56	401	10	1.4742		euhedral
L6-71	614	1.568	0.449	0.013	0.0585	0.0013	0.64585	374.9	9	366.4	7.8	394	49	366.4	7.8	2.26727
L6-73	288.8	1.329	0.72	0.023	0.0867	0.002	0.5886	550	14	536	12	573	60	536	12	2.54545
L6-74	315	1.248	0.778	0.029	0.094	0.0037	0.65113	582	17	578	22	587	68	578	22	0.687285
L6-75	438	3.87	0.502	0.013	0.0649	0.0014	0.39258	413.3	8.7	405.1	8.5	429	54	405.1	8.5	1.98403
L6-76	241	1.712	3.191	0.073	0.2414	0.0048	0.48689	1452	18	1392	25	1531	41	1531	41	9.07903
L6-77	468	1.69	0.775	0.065	0.0941	0.0056	0.50751	581	36	580	33	580	150	580	33	0.172117
L6-78	122.3	1.412	0.492	0.022	0.0642	0.0016	0.41155	403	15	401.2	9.6	368	82	401.2	9.6	0.44665
L6-79	364	1.41	0.739	0.022	0.0899	0.0023	0.56876	559	13	555	14	552	58	555	14	0.715564
L6-80	860	4.02	0.473	0.018	0.0635	0.0025	0.80818	391	12	396	15	366	51	396	15	1.27877
L6-81	314	2.28	15.04	0.54	0.486	0.021	0.70379	2810	33	2549	90	2999	51	2999	51	15.005
L6-82	444	1.287	0.722	0.028	0.0876	0.0028	0.4178	549	17	541	17	568	78	541	17	1.45719
L6-83	368	3.77	0.667	0.021	0.0809	0.0019	0.49519	516	13	501	12	551	64	501	12	2.90698
L6-84	1060	2.24	0.548	0.028	0.0668	0.0034	0.56317	442	18	416	20	569	98	416	20	5.88235
L6-85	1280	2.118	0.324	0.012	0.04312	0.00098	0.50401	284.3	9	272.1	6	370	70	272.1	6	4.29124		euhedral
L6-86	241	3.92	0.604	0.024	0.0769	0.0021	0.41561	478	15	477	12	449	77	477	12	0.209205
L6-87	328	2.908	3.326	0.083	0.2491	0.0058	0.81414	1481	19	1432	30	1547	28	1547	28	7.43374
L6-88	99	0.615	1.573	0.056	0.1543	0.0035	0.46833	952	22	924	20	994	65	994	65	7.04225
L6-89	358	0.771	0.848	0.023	0.1016	0.002	0.61024	621	12	624	12	599	47	624	12	0.483092
L6-90	325	1.37	0.676	0.025	0.0833	0.0023	0.44266	523	15	516	13	524	73	516	13	1.33843
L6-91	313	0.78	0.735	0.04	0.0917	0.0034	0.62265	556	24	565	20	503	95	565	20	1.61871
L6-92	254	2.75	0.416	0.017	0.0553	0.0018	0.39335	353	12	347	11	359	82	347	11	1.69972
L6-93	494	0.905	0.365	0.011	0.0489	0.0013	0.62733	315.1	8.4	307.6	7.7	350	58	307.6	7.7	2.3802
L6-94	306	1.352	0.447	0.019	0.0547	0.0016	0.63799	373	13	343	10	528	74	343	10	8.0429		euhedral
L6-95	629	52	0.891	0.068	0.1045	0.0052	0.73833	641	35	640	31	600	100	640	31	0.156006
L6-96	730	48	1.652	0.047	0.1587	0.0045	0.66726	985	18	948	25	1068	43	1068	43	11.236
L6-97	510	7.34	0.309	0.016	0.0432	0.0017	0.48611	272	12	273	11	281	99	273	11	0.367647		euhedral
L6-98	241	3.23	2.515	0.063	0.2091	0.0046	0.6099	1271	18	1222	25	1367	38	1367	38	10.6072		euhedral
L6-99	110	2.33	2.167	0.067	0.1946	0.0054	0.49834	1164	21	1144	29	1197	58	1197	58	4.42774
L6-100	480	1.886	0.524	0.016	0.0673	0.0015	0.4036	428	10	419.9	9.2	449	51	419.9	9.2	1.89252
L6-101	185	14	13.55	0.35	0.489	0.012	0.8046	2713	25	2558	52	2834	27	2834	27	9.73888
L6-102	842	6.5	0.463	0.013	0.0613	0.0015	0.61732	384.8	8.8	383.2	8.9	391	50	383.2	8.9	0.4158
L6-103	466	2.26	0.586	0.015	0.0749	0.0016	0.5255	467.2	9.6	465.6	9.4	462	52	465.6	9.4	0.342466
L6-104	180.9	1.3	0.776	0.028	0.0925	0.0022	0.51597	579	16	570	13	580	67	570	13	1.5544
L6-105	125.6	0.7	5.33	0.16	0.3115	0.0092	0.7179	1864	26	1743	45	2010	37	2010	37	13.2836
L6-106	375	6.01	0.432	0.014	0.0573	0.0013	0.44487	363	10	359.2	8	379	66	359.2	8	1.04683
L6-107	142.4	1.068	2.53	0.073	0.2089	0.0056	0.52542	1274	21	1221	30	1366	55	1366	55	10.6149
L6-108	109.7	1.245	2.982	0.086	0.2307	0.0057	0.73967	1395	22	1336	30	1493	39	1493	39	10.5157
Sample: L7				Isotopic ratios								Isotopic ages (Ma)
Grain #	[U] ppm	U/Th	207/235	2σ error	206/238	2σ error	RHO	207/235	2σ error	206/238	2σ error	207/206	2σ error	Best age	2σ error	% Discordance*	Rim/Core
L7_1	632	8.6	0.477	0.015	0.0641	0.0013	0.37651	395	10	400.4	7.7	348	65	400.4	7.7	1.36709	Rim
L7_1	222	1.428	0.599	0.046	0.0766	0.003	0.1052	474	29	476	18	430	170	476	18	0.421941	Core
L7_2	494	4.4	0.621	0.023	0.077	0.0016	0.53792	488	14	478.1	9.8	518	66	478.1	9.8	2.02869
L7_3	628	8.56	1.497	0.059	0.1487	0.0044	0.71048	927	24	893	25	1014	53	1014	53	11.9329	Rim
L7_3	209.8	1.87	1.894	0.099	0.1791	0.005	0.41105	1075	34	1061	27	1092	98	1092	98	2.83883	Core
L7_4	845	1.191	0.447	0.017	0.0591	0.0017	0.64312	374	12	370	11	410	67	370	11	1.06952
L7_5	474	0.937	0.44	0.017	0.0535	0.0011	0.43681	369	12	335.7	6.5	557	81	335.7	6.5	9.02439
L7_8	159	1.153	0.599	0.025	0.0784	0.0014	0.20379	478	16	486.4	8.6	412	90	486.4	8.6	1.75732
L7_9	412	2.865	3.778	0.06	0.2785	0.0033	0.56211	1586	13	1583	16	1594	25	1594	25	0.690088
L7_10	249.1	1.235	0.951	0.025	0.1099	0.002	0.22888	680	12	672	12	688	61	672	12	1.17647
L7_11	213.8	0.595	1.271	0.03	0.1335	0.0019	0.44395	830	14	807	11	896	44	807	11	2.77108
L7_12	272	2.52	0.509	0.017	0.0688	0.0012	0.32932	419	11	428.7	7.4	370	67	428.7	7.4	2.31504
L7_13	623	10.7	0.592	0.037	0.0744	0.0051	0.51898	469	23	469	33	510	130	469	33	0	Rim
L7_13	210	2.8	0.821	0.03	0.0994	0.0019	0.43152	606	17	611	11	562	72	611	11	0.825083	Core
L7_14	413	0.576	0.317	0.016	0.04472	0.00082	0.051555	279	12	282	5	250	110	282	5	1.07527		euhedral
L7_15	116	0.924	1.218	0.043	0.1352	0.003	0.40827	803	20	817	17	747	70	817	17	1.74346
L7_16	705	1.289	0.442	0.011	0.05906	0.00082	0.41335	371.6	7.2	369.8	5	359	49	369.8	5	0.484392
L7_17	613	3.02	0.728	0.053	0.0894	0.0045	0.62688	551	30	552	26	530	110	552	26	0.181488
L7_18	135.6	0.672	0.747	0.042	0.093	0.0025	0.3796	562	24	573	15	490	110	573	15	1.9573
L7_19	266	1.405	1.06	0.026	0.1208	0.0021	0.49648	731	13	735	12	707	49	735	12	0.547196
L7_20	479	1.977	1.632	0.04	0.1606	0.0027	0.53278	981	16	960	15	1010	44	1010	44	4.9505
L7_21	145.3	0.782	0.523	0.022	0.0695	0.0014	0.35716	426	14	432.8	8.4	379	83	432.8	8.4	1.59624
L7_22	167	7.8	0.464	0.025	0.0597	0.0015	0.19544	382	18	373.8	9.4	410	110	373.8	9.4	2.1466
L7_23	159	2.6	6.29	0.11	0.3544	0.0058	0.55658	2018	15	1954	28	2062	29	2062	29	5.23763
L7_24	370	1.423	5.17	0.12	0.2725	0.0047	0.47863	1849	22	1553	24	2179	38	2179	38	28.7288
L7_25	549	1.7	2.216	0.086	0.176	0.0093	0.47543	1183	27	1043	50	1442	92	1442	92	27.6699	Rim
L7_25	122.1	0.438	5.65	0.13	0.3339	0.0067	0.56016	1920	20	1855	33	1967	36	1967	36	5.69395	Core
L7_26	155.9	2.248	1.857	0.055	0.1804	0.0046	0.31778	1062	19	1068	25	1005	68	1005	68	6.26866
L7_27	383	0.799	3.27	0.087	0.236	0.0062	0.69149	1470	21	1365	32	1606	39	1606	39	15.0062
L7_29	118.9	0.605	3.77	0.12	0.2482	0.0059	0.7579	1579	25	1427	30	1768	36	1768	36	19.2873
L7_30	120.1	2.217	1.657	0.077	0.1649	0.0053	0.54923	984	29	982	29	944	82	944	82	4.02542		euhedral
L7_32	146.8	2.026	6.6	0.1	0.3683	0.0053	0.46287	2057	13	2020	25	2078	27	2078	27	2.79115
L7_33	90.9	1.273	5.62	0.11	0.3236	0.0052	0.44524	1917	17	1806	25	2020	34	2020	34	10.5941
L7_34	214	1.025	4.362	0.067	0.3034	0.0046	0.63002	1703	13	1710	23	1680	25	1680	25	1.78571
L7_35	146	0.857	0.871	0.031	0.1021	0.0018	0.20309	632	17	626	11	607	79	626	11	0.949367
L7_36	62.2	0.654	7.9	0.23	0.358	0.0071	0.47102	2213	26	1971	34	2420	47	2420	47	18.5537
L7_37	176.3	1.756	13.08	0.18	0.5084	0.0062	0.55613	2683	12	2648	27	2694	20	2694	20	1.7075
L7_38	156	0.859	0.741	0.036	0.0896	0.0021	0.34805	563	23	553	12	550	110	553	12	1.7762
L7_39	1094	3.12	0.3509	0.0088	0.04844	0.00092	0.59374	304.7	6.6	304.9	5.7	294	45	304.9	5.7	0.0656383
L7_40	323	1.462	0.561	0.016	0.07472	0.00097	0.25942	451	10	464.4	5.8	357	59	464.4	5.8	2.97118
L7_41	165	1.54	0.543	0.023	0.0724	0.0017	0.34345	437	15	451	10	353	83	451	10	3.20366
L7_42	396	2.71	0.889	0.022	0.1056	0.0015	0.40446	644	11	647.2	8.7	611	48	647.2	8.7	0.496894
L7_43	490	1.03	0.587	0.014	0.0756	0.001	0.40853	467.3	9.2	469.4	6	433	54	469.4	6	0.44939
L7_44	520	0.921	0.376	0.012	0.0505	0.0011	0.49126	322.6	8.9	317.5	7	359	66	317.5	7	1.58091
L7_45	48.4	3.63	2.264	0.078	0.1959	0.0048	0.22213	1197	24	1152	26	1263	75	1263	75	8.7886
L7_46	249.1	1.168	0.35	0.015	0.0476	0.00089	0.20313	303	11	299.7	5.5	312	87	299.7	5.5	1.08911		euhedral
L7_48	328	1.7	0.584	0.018	0.0755	0.0012	0.30654	467	12	469.3	7.4	443	67	469.3	7.4	0.492505
L7_49	482	10.4	1.693	0.07	0.1637	0.0048	0.39046	1003	26	977	27	1065	82	1065	82	8.26291	Rim
L7_49	52.3	1.41	2.7	0.11	0.2275	0.0057	0.26803	1322	30	1320	30	1327	79	1327	79	0.527506	Core
L7_50	642	2.19	0.355	0.011	0.04909	0.00093	0.35349	307.6	8.6	308.9	5.7	293	65	308.9	5.7	0.422627		euhedral
L7_51	243	3.67	0.615	0.022	0.079	0.0016	0.13869	484	14	489.7	9.6	462	81	489.7	9.6	1.17769
L7_52	78.6	0.905	1.676	0.082	0.1564	0.0039	0.26807	993	32	936	22	1090	100	1090	100	14.1284
L7_53	159.6	1.021	0.67	0.023	0.0847	0.0015	0.12376	520	15	524.1	8.8	501	79	524.1	8.8	0.788462
L7_54	750	1.023	0.4439	0.0093	0.05923	0.0009	0.25161	372.4	6.5	370.9	5.5	384	50	370.9	5.5	0.402793
L7_55	149	1.232	0.82	0.029	0.0992	0.0019	0.16572	604	16	609	11	572	79	609	11	0.827815
L7_56	176.4	1.141	0.56	0.02	0.0753	0.0015	0.13418	449	13	467.9	9.3	353	79	467.9	9.3	4.20935
L7_57	121.8	0.673	0.342	0.018	0.0484	0.0011	0.048943	296	13	304.6	6.8	250	110	304.6	6.8	2.90541
L7_58	415	1.93	0.565	0.024	0.0752	0.0029	0.44264	451	15	466	18	354	84	466	18	3.32594
L7_59	57	0.474	0.45	0.038	0.0623	0.0019	0.088869	376	29	389	11	270	170	389	11	3.45745		euhedral
L7_60	318.7	1.959	4.9	0.12	0.3093	0.0068	0.66281	1800	21	1736	33	1884	36	1884	36	7.85563
L7_61	339	6.2	0.445	0.016	0.0578	0.0013	0.32337	372	11	363.5	8	411	78	363.5	8	2.28495		euhedral
L7_62	390	3.3	2.274	0.04	0.2047	0.0033	0.51312	1202	12	1200	18	1214	39	1214	39	1.15321
L7_63	321	2.02	0.868	0.023	0.1053	0.0016	0.12063	632	13	645.1	9.2	576	62	645.1	9.2	2.07278
L7_64	2000	9.8	1.73	0.12	0.17	0.0096	0.7668	1014	45	1011	52	1035	84	1035	84	2.31884	Rim
L7_64	478	1.425	3.173	0.063	0.2549	0.0046	0.70931	1448	15	1463	23	1429	28	1429	28	2.37929	Core
L7_65	602	2.99	0.756	0.023	0.0921	0.0019	0.55092	569	13	568	12	585	49	568	12	0.175747
L7_66	465	0.781	0.505	0.016	0.0674	0.0015	0.46308	413	10	420.5	8.8	372	59	420.5	8.8	1.81598
L7_67	436	1.199	0.738	0.018	0.0936	0.0011	0.39166	561	11	576.9	6.7	489	50	576.9	6.7	2.83422
L7_68	189	0.541	0.671	0.025	0.0826	0.0015	0.23481	517	15	511.5	8.9	520	80	511.5	8.9	1.06383
L7_69	232.1	0.897	1.094	0.034	0.1206	0.0026	0.16439	748	16	733	15	803	75	733	15	2.00535	Rim
L7_69	112.6	0.642	1.285	0.08	0.1358	0.0036	0.23682	833	35	821	21	840	130	821	21	1.44058	Core
L7_70	446	55	0.892	0.045	0.1038	0.0032	0.45987	645	24	636	19	660	110	636	19	1.39535	Rim
L7_70	79.7	1.574	1.729	0.078	0.1723	0.005	0.3642	1017	31	1024	27	993	98	993	98	3.12185	Core
L7_71	542	7.6	0.813	0.024	0.0977	0.0023	0.52373	605	13	601	13	617	60	601	13	0.661157	Rim
L7_71	334	0.805	0.916	0.037	0.1088	0.0024	0.26722	658	20	669	16	610	92	669	16	1.67173	Core
L7_72	179.3	1.573	0.776	0.027	0.0946	0.0021	0.35006	584	16	582	12	573	77	582	12	0.342466
L7_73	934	1.512	0.3325	0.0094	0.04417	0.00079	0.40214	290.9	7.2	278.6	4.9	352	61	278.6	4.9	4.22826
L7_74	179	1.161	0.465	0.027	0.0585	0.0015	0.083631	385	19	366.6	9.2	380	130	366.6	9.2	4.77922
L7_75	208	3.25	6.86	0.13	0.3905	0.0061	0.62935	2089	16	2123	28	2068	26	2068	26	2.65957
L7_76	535	46.1	0.448	0.011	0.05708	0.00093	0.4026	375	8	357.7	5.7	451	55	357.7	5.7	4.61333
L7_77	27.7	0.625	0.692	0.07	0.072	0.0042	0.42534	514	44	447	25	790	190	447	25	13.035
L7_78	229	1.404	0.643	0.025	0.0816	0.0027	0.42259	503	16	505	16	516	87	505	16	0.397614
L7_79	523	1.477	0.76	0.018	0.0925	0.0014	0.4282	572	10	570.3	8.3	575	47	570.3	8.3	0.297203
L7_80	261	4.2	0.627	0.021	0.0823	0.0014	0.17771	493	13	509.6	8.5	408	73	509.6	8.5	3.36714
L7_81	93.8	0.757	1.78	0.069	0.1721	0.0043	0.34266	1030	26	1026	24	1026	81	1026	81	0
L7_82	462	0.879	2.16	0.054	0.1994	0.0036	0.33702	1167	18	1172	19	1169	54	1169	54	0.25663	Rim
L7_82	249	1.083	2.418	0.075	0.2174	0.0041	0.35244	1244	23	1268	22	1214	56	1214	56	4.44811	Core
L7_83	305	3.93	0.761	0.025	0.0937	0.002	0.40958	572	14	577	12	545	65	577	12	0.874126
L7_84	110	10.8	1.8	0.15	0.1723	0.0062	0.16296	1029	57	1024	34	1020	190	1020	190	0.392157
L7_85	51.9	0.833	0.807	0.043	0.0997	0.0028	0.02465	594	25	612	16	510	120	612	16	3.0303
L7_86	335.4	3.57	7.63	0.12	0.3993	0.0067	0.68136	2185	14	2164	31	2203	21	2203	21	1.77031
L7_87	235.3	1.092	2.195	0.054	0.2037	0.0039	0.44671	1175	17	1194	21	1153	47	1153	47	3.55594
L7_88	78.7	0.839	0.814	0.038	0.101	0.0022	0.082189	600	22	620	13	500	100	620	13	3.33333
L7_89	510	4.97	0.44	0.014	0.0604	0.0012	0.37721	368.8	9.7	378.2	7	319	67	378.2	7	2.54881
L7_90	407.3	0.73	0.801	0.02	0.0959	0.0015	0.27781	595	11	590.2	9	599	54	590.2	9	0.806723
L7_91	1420	32	0.484	0.044	0.0607	0.0061	0.65869	398	30	379	37	530	180	379	37	4.77387	Rim
L7_91	1050	7.06	9.66	0.19	0.4138	0.0087	0.71721	2401	18	2239	42	2536	27	2536	27	11.7114	Core
L7_92	416	2.332	4.6	0.064	0.3051	0.0044	0.55979	1747	12	1716	22	1788	27	1788	27	4.02685
L7_93	288	1.26	0.764	0.027	0.0929	0.003	0.43029	577	17	572	18	600	71	572	18	0.866551
L7_94	185.9	3.33	5.46	0.15	0.3229	0.0067	0.48475	1892	24	1803	33	1980	48	1980	48	8.93939
L7_95	1482	31.9	0.534	0.034	0.0697	0.0038	0.6962	434	22	434	23	430	130	434	23	0	Rim
L7_95	831	12.19	0.858	0.031	0.098	0.0028	0.7559	627	17	603	16	714	47	603	16	3.82775	Core
L7_96	1460	18.6	0.984	0.087	0.113	0.01	0.47199	688	44	686	60	730	210	686	60	0.290698
L7_97	565	8.4	0.688	0.019	0.0866	0.0015	0.60844	531	11	535.1	9.1	485	47	535.1	9.1	0.772128
L7_98	339	3.02	0.467	0.014	0.0626	0.0012	0.2124	388.8	9.9	391.2	7.3	361	68	391.2	7.3	0.617284
L7_100	529	1.236	0.515	0.025	0.0676	0.0017	0.37241	421	17	422	10	403	98	422	10	0.23753
L7_101	483	1.092	0.46	0.015	0.0594	0.0011	0.35767	384	10	371.7	6.4	436	67	371.7	6.4	3.20313
L7_102	93.1	8.69	6.03	0.15	0.3421	0.006	0.58134	1975	21	1895	29	2062	36	2062	36	8.09893
L7_103	1309	22.2	0.467	0.027	0.0607	0.0026	0.64788	387	18	380	16	427	96	380	16	1.80879	Rim
L7_103	153.9	2.289	2.006	0.086	0.1787	0.0051	0.40663	1112	29	1059	28	1201	81	1201	81	11.8235	Core
L7_105	439	1.284	5.35	0.13	0.3375	0.0068	0.56086	1875	21	1874	33	1872	39	1872	39	0.106838
L7_106	341	0.87	0.326	0.011	0.04534	0.00075	0.00053832	286.4	8.4	285.8	4.6	276	79	285.8	4.6	0.209497
L7_107	215	0.535	0.848	0.035	0.0994	0.0025	0.39694	617	19	610	14	627	83	610	14	1.13452
L7_108	436	1.359	0.501	0.016	0.0659	0.0016	0.45273	411	11	411	9.4	386	66	411	9.4	0		euhedral
L7_109	210	1.287	0.82	0.027	0.0978	0.0017	0.22031	604	15	601	10	592	73	601	10	0.496689
L7_110	496	2.955	3.888	0.073	0.2746	0.0054	0.65236	1609	15	1563	27	1678	31	1678	31	6.8534
L7_111	907	3.47	0.314	0.012	0.0433	0.0011	0.42639	276.7	9.1	273	6.7	299	78	273	6.7	1.33719
L7_112	183.3	2.088	3.223	0.069	0.2516	0.0045	0.41082	1459	16	1445	23	1475	42	1475	42	2.0339
L7_113	163.5	1.64	3.795	0.094	0.2791	0.0058	0.55105	1586	20	1585	29	1590	41	1590	41	0.314465
L7_114	117.7	1.21	0.677	0.039	0.0834	0.0022	0.30522	517	23	516	13	490	110	516	13	0.193424
L7_115	167.5	0.588	1.894	0.062	0.1803	0.0036	0.37789	1073	22	1068	19	1096	61	1096	61	2.55474
L7_116	282	2.23	0.599	0.029	0.077	0.0022	0.39914	474	19	478	13	470	100	478	13	0.843882	Rim
L7_116	213.2	1.891	0.676	0.049	0.0857	0.004	0.31915	521	30	530	24	470	160	530	24	1.72745	Core
L7_117	344	1.983	6.87	0.14	0.3566	0.0066	0.73647	2092	17	1964	31	2223	25	2223	25	11.6509
L7_118	259	2.5	1.158	0.024	0.1313	0.0019	0.23347	781	11	796	11	745	47	796	11	1.92061
L7_119	307	1.325	3.298	0.071	0.2427	0.0056	0.55201	1478	17	1400	29	1599	40	1599	40	12.4453
L7_120	220.2	1.46	12.41	0.48	0.49	0.015	0.67833	2632	36	2569	65	2684	50	2684	50	4.28465
L7_121	848	55.3	1.83	0.12	0.167	0.01	0.72811	1048	44	995	55	1178	98	1178	98	15.5348	Rim
L7_121	252	11.1	2.721	0.085	0.2293	0.0054	0.65499	1329	23	1330	28	1337	49	1337	49	0.52356	Core
L7_122	731	1.78	0.619	0.021	0.0772	0.002	0.57426	486	13	479	12	527	61	479	12	1.44033
L7_123	347	3.46	3.798	0.09	0.2745	0.0061	0.61442	1588	19	1562	31	1630	38	1630	38	4.17178
L7_124	395	1.49	0.56	0.016	0.0742	0.0013	0.47305	450	10	461	7.8	399	57	461	7.8	2.44444
L7_125	627	40.7	4.42	0.12	0.2821	0.0059	0.62592	1715	21	1601	30	1851	39	1851	39	13.5062
L7_126	340	2.58	0.777	0.024	0.0955	0.0017	0.31078	581	14	588	10	541	67	588	10	1.20482
L7_127	840	33.8	0.886	0.06	0.1061	0.008	0.62059	640	32	649	46	680	130	649	46	1.40625	Rim
L7_127	137.5	1.002	4.49	0.21	0.2716	0.0087	0.4516	1725	41	1548	44	1941	84	1941	84	20.2473	Core
L7_128	392	1.36	0.884	0.031	0.1041	0.0026	0.51493	643	17	638	15	659	69	638	15	0.777605
L7_129	272.4	1.45	0.407	0.021	0.053	0.0012	0.056434	345	15	333.1	7.6	400	120	333.1	7.6	3.44928
L7_130	1620	4.92	0.497	0.034	0.0643	0.005	0.85716	408	23	401	30	523	81	401	30	1.71569	Rim
L7_130	425	3.2	0.776	0.029	0.0933	0.0019	0.50354	580	16	575	11	632	83	575	11	0.862069	Core
L7_131	56.3	1.035	4.83	0.13	0.311	0.007	0.36228	1784	23	1743	34	1833	52	1833	52	4.90998
L7_132	431	2.9	0.626	0.025	0.077	0.0021	0.51377	494	17	478	13	560	77	478	13	3.23887
L7_133	89.6	1.147	3.7	0.16	0.2699	0.0075	0.27006	1568	34	1540	38	1594	80	1594	80	3.3877
L7_134	531	2.37	0.775	0.029	0.0965	0.0022	0.46855	580	17	594	13	526	79	594	13	2.41379
L7_135	210	2.92	1.086	0.058	0.1138	0.0033	0.24048	743	28	694	19	880	110	694	19	6.59489	Rim
L7_135	218.8	3.41	1.46	0.052	0.1386	0.004	0.40184	911	22	836	23	1085	70	836	23	8.23271	Core
L7_136	1014	30.5	0.507	0.027	0.0683	0.0028	0.55145	419	20	426	17	380	100	426	17	1.67064	Rim
L7_136	312	1.142	0.767	0.028	0.0945	0.002	0.10242	576	16	582	12	526	87	582	12	1.04167	Core
L7_137	982	1.16	0.492	0.017	0.0625	0.0017	0.6915	406	11	391	10	468	62	391	10	3.69458	Rim	euhedral
L7_137	542	1.055	0.533	0.022	0.0687	0.0017	0.46325	433	15	428	11	431	83	428	11	1.15473	Core
L7_138	1169	1.67	2.319	0.061	0.2043	0.0069	0.81442	1215	19	1197	37	1270	37	1270	37	5.74803
L7_139	645	2.25	0.588	0.031	0.0747	0.0026	0.61471	468	20	464	16	457	90	464	16	0.854701	Rim	euhedral
L7_139	302	2.192	0.697	0.051	0.0858	0.0035	0.42429	535	30	531	21	520	150	531	21	0.747664	Core
L7_140	233	0.941	0.689	0.036	0.0831	0.0024	0.070886	529	22	515	15	570	130	515	15	2.6465
L7_141	510	1.573	0.555	0.017	0.0729	0.0012	0.22288	448	11	453.4	7.2	400	65	453.4	7.2	1.20536
L7_142	273	1.844	0.489	0.019	0.0653	0.0012	0.1522	402	13	407.4	7.1	362	83	407.4	7.1	1.34328
L7_143	139	7.1	0.584	0.03	0.0754	0.003	0.56287	462	19	468	18	420	100	468	18	1.2987
Sample: L8				Isotopic ratios								Isotopic ages (Ma)
Grain #	[U] ppm	U/Th	207/235	2σ error	206/238	2σ error	RHO	207/235	2σ error	206/238	2σ error	207/206	2σ error	Best age	2σ error	% Discordance*	Rim/Core
L8_1	358	2.42	1.286	0.032	0.1381	0.0033	0.72248	837	15	833	19	865	39	833	19	0.477897
L8_2	265	1.081	5.462	0.072	0.3427	0.004	0.61546	1893	11	1899	19	1900	20	1900	20	0.0526316
L8_3	1015	44.9	5.654	0.071	0.3443	0.0044	0.80845	1924	11	1909	22	1954	16	1954	16	2.30297
L8_4	662	4.25	3.269	0.068	0.2576	0.0047	0.81299	1475	16	1476	24	1505	24	1505	24	1.92691
L8_5	1267	2.49	0.783	0.026	0.0942	0.0034	0.54871	585	15	580	20	647	75	580	20	0.854701
L8_6	450	32.8	0.524	0.011	0.0678	0.0012	0.51739	426.7	7.6	422.9	7.2	460	45	422.9	7.2	0.890555
L8_7	1395	5.85	1.542	0.033	0.1536	0.0028	0.62579	946	13	921	16	1025	31	1025	31	10.1463
L8_8	344	1.672	2.121	0.061	0.2015	0.0056	0.82966	1150	20	1182	30	1118	34	1118	34	5.72451
L8_9	1332	1.497	0.343	0.014	0.0446	0.0016	0.605	299	11	281	10	447	78	281	10	6.02007
L8_10	1616	1.908	1.883	0.045	0.1687	0.0041	0.78656	1076	15	1005	23	1246	27	1246	27	19.3419
L8_11	243.6	0.908	5.19	0.13	0.3287	0.0073	0.58142	1847	22	1831	35	1882	41	1882	41	2.70988
L8_12	366	2.609	0.7	0.014	0.0872	0.0012	0.48035	537.9	8.4	538.9	7.2	544	38	538.9	7.2	0.185908
L8_13	577	1.718	0.78	0.014	0.0944	0.0013	0.54125	584.8	7.7	581.3	7.6	618	34	581.3	7.6	0.598495
L8_14	539	1.817	0.4715	0.0097	0.0636	0.001	0.32819	391.6	6.7	397.2	6.3	380	50	397.2	6.3	1.43003		euhedral
L8_15	80.2	1.762	1.681	0.042	0.1711	0.0027	0.19153	1000	16	1017	15	978	48	978	48	3.98773
L8_16	359	6.35	6.779	0.094	0.373	0.0048	0.72121	2081	12	2043	22	2140	17	2140	17	4.53271
L8_17	382	0.895	0.903	0.037	0.1062	0.0046	0.5626	658	23	650	27	702	94	650	27	1.21581
L8_18	451	1.535	0.787	0.022	0.0935	0.002	0.52756	588	12	576	12	653	51	576	12	2.04082
L8_19	359	0.657	0.738	0.018	0.0877	0.0017	0.57655	560	10	541.8	9.8	663	45	541.8	9.8	3.25
L8_20	222.3	2.768	6.129	0.094	0.3607	0.006	0.64612	1992	13	1984	28	2026	24	2026	24	2.07305
L8_21	1079	0.989	0.714	0.023	0.0881	0.0026	0.81407	546	14	544	15	579	42	544	15	0.3663
L8_22	900	19.6	0.664	0.016	0.0825	0.0015	0.71318	516.2	9.5	511.2	8.8	574	39	511.2	8.8	0.968617
L8_23	134	3.49	3.14	0.17	0.259	0.01	0.46116	1430	43	1480	53	1380	100	1380	100	7.24638
L8_24	436	5.01	0.708	0.024	0.0851	0.003	0.81308	542	14	527	18	639	50	527	18	2.76753
L8_25	828	1.645	0.3036	0.0092	0.0426	0.001	0.45307	268.6	7.2	269.6	6	309	64	269.6	6	0.372301
L8_26	738	7.85	0.4652	0.0093	0.06127	0.00094	0.49321	387.2	6.4	383.3	5.7	439	41	383.3	5.7	1.00723
L8_27	414	2.1	0.924	0.023	0.1075	0.002	0.61221	663	12	658	12	700	39	658	12	0.754148
L8_28	265	0.909	0.743	0.019	0.0888	0.0014	0.52359	562	11	548.2	8.1	633	49	548.2	8.1	2.45552
L8_30	148.1	1.423	0.89	0.022	0.1041	0.0015	0.3572	644	12	638.4	8.9	690	49	638.4	8.9	0.869565
L8_31	172	1.275	0.918	0.024	0.1079	0.0019	0.37029	659	13	662	10	673	55	662	10	0.455235
L8_32	305	0.989	0.78	0.015	0.0955	0.0014	0.40429	584	8.7	587.7	8	595	41	587.7	8	0.633562
L8_33	531	2.03	4.165	0.078	0.3059	0.005	0.75149	1664	15	1719	25	1620	22	1620	22	6.11111
L8_34	432	1.82	1.545	0.054	0.1535	0.004	0.60341	946	21	920	22	1035	55	1035	55	11.1111
L8_35	356	1.369	3.045	0.086	0.2141	0.0063	0.87174	1416	22	1250	34	1707	42	1707	42	26.7721
L8_36	378	3.53	0.625	0.014	0.0802	0.0011	0.42005	491.8	8.9	497.3	6.7	490	46	497.3	6.7	1.11834
L8_37	70.4	0.671	3.702	0.099	0.2744	0.0047	0.41034	1568	21	1562	24	1602	47	1602	47	2.49688
L8_38	210	1.3	0.796	0.026	0.0988	0.0021	0.21063	593	15	607	12	558	76	607	12	2.36088
L8_39	194.9	1.054	0.55	0.016	0.0711	0.0012	0.3031	445	11	442.6	7.3	473	64	442.6	7.3	0.539326
L8_40	167.2	1.646	0.758	0.031	0.0909	0.003	0.61323	571	18	561	18	656	75	561	18	1.75131
L8_41	312	1.86	2.491	0.057	0.211	0.0039	0.70375	1265	17	1233	21	1347	31	1347	31	8.46325
L8_42	79.6	2.35	1.393	0.047	0.1482	0.0027	0.40382	880	20	890	15	879	68	879	68	1.25142
L8_43	790	14	0.781	0.047	0.0918	0.0054	0.49309	583	26	566	32	690	120	566	32	2.91595	Rim
L8_43	555	2.26	2.157	0.062	0.1821	0.0046	0.91878	1163	20	1078	25	1354	21	1354	21	20.384	Core
L8_44	274	1.031	0.541	0.014	0.0707	0.0013	0.48445	437.9	8.9	441.4	8.3	446	51	441.4	8.3	0.799269
L8_45	125	1.32	17.27	0.26	0.564	0.0082	0.74399	2947	15	2880	34	3022	19	3022	19	4.69887
L8_46	233	1.92	3.144	0.077	0.2533	0.0057	0.62101	1441	19	1455	29	1452	39	1452	39	0.206612
L8_47	147.5	1.021	0.543	0.024	0.0665	0.0026	0.27545	439	16	415	16	570	110	415	16	5.46697	Rim
L8_47	462	4.56	1.296	0.063	0.1396	0.0053	0.88605	840	28	842	30	861	50	842	30	0.238095	Core
L8_48	558	2.81	10.85	0.18	0.4489	0.0073	0.83213	2508	15	2392	33	2624	15	2624	15	8.84146
L8_49	84.6	2.136	0.741	0.025	0.0923	0.0017	0.23141	559	15	569	10	529	75	569	10	1.78891
L8_50	434	0.706	7.1	0.17	0.3705	0.0065	0.83845	2118	21	2030	31	2232	24	2232	24	9.05018
L8_51	615	2.058	0.405	0.012	0.0543	0.0013	0.72732	344.4	9	341	7.9	390	46	341	7.9	0.987224
L8_52	853	3.72	0.825	0.014	0.0984	0.0016	0.41247	610.4	7.6	605	9.7	653	39	605	9.7	0.884666
L8_53	840	2.37	0.617	0.01	0.0796	0.0011	0.59907	487.6	6.5	493.5	6.6	485	32	493.5	6.6	1.21001
L8_54	377	4.2	3.315	0.054	0.2598	0.004	0.69597	1482	13	1488	21	1499	23	1499	23	0.733823
L8_55	341	1.535	0.793	0.024	0.0944	0.0033	0.61532	593	13	581	20	648	66	581	20	2.02361
L8_56	192	4.13	2.715	0.094	0.2448	0.0063	0.69403	1334	24	1411	32	1238	45	1238	45	13.9742
L8_57	632	3.52	0.824	0.017	0.0989	0.0017	0.61534	609.2	9.4	608	10	635	37	608	10	0.19698
L8_58	363	2.62	0.43	0.015	0.0557	0.0015	0.61361	362	11	349.6	8.9	481	61	349.6	8.9	3.42541		euhedral
L8_59	482	1.005	1.542	0.061	0.1546	0.0078	0.70333	944	26	923	43	1065	57	1065	57	13.3333
L8_60	718	3.92	5.61	0.13	0.3189	0.0079	0.81744	1920	19	1782	39	2091	25	2091	25	14.7776
L8_61	1770	1.124	0.435	0.027	0.0556	0.0045	0.67494	365	19	349	27	520	120	349	27	4.38356
L8_62	998	2.05	0.51	0.01	0.0671	0.0011	0.71762	417.5	6.8	419.2	6.6	429	34	419.2	6.6	0.407186		euhedral
L8_64	142.6	1.149	6.226	0.097	0.3634	0.0048	0.6281	2006	14	1997	23	2030	23	2030	23	1.62562
L8_65	125.4	0.508	6.17	0.14	0.3466	0.0074	0.83298	1995	20	1916	35	2096	27	2096	27	8.58779
L8_66	335	2.702	5.03	0.14	0.3253	0.0057	0.71583	1818	24	1814	28	1830	35	1830	35	0.874317
L8_67	1001	22.9	0.833	0.06	0.0917	0.0065	0.81984	611	34	565	38	804	99	565	38	7.52864	Rim
L8_67	438	6.95	1.603	0.035	0.1625	0.0027	0.67284	969	13	970	15	980	32	980	32	1.02041	Core
L8_68	578	1.398	1.178	0.029	0.1225	0.0023	0.7625	789	14	745	13	922	34	745	13	5.57668
L8_70	181	0.587	0.832	0.027	0.0975	0.0018	0.32676	613	15	599	11	674	72	599	11	2.28385
L8_71	174	5.84	0.8	0.035	0.0868	0.0036	0.47147	592	20	536	21	835	84	536	21	9.45946
L8_72	463	1.16	0.9	0.018	0.1073	0.0016	0.56335	650.1	9.5	656.7	9.2	631	36	656.7	9.2	1.01523
L8_73	1079	2.87	0.742	0.013	0.0892	0.0014	0.72316	562.6	7.8	550.4	8.1	619	28	550.4	8.1	2.1685
L8_74	2310	1.05	0.738	0.037	0.0867	0.0046	0.74198	560	22	535	27	669	81	535	27	4.46429
L8_75	255	2.418	3.116	0.078	0.2503	0.0055	0.88521	1431	20	1443	27	1432	25	1432	25	0.768156
L8_76	576	3.375	3.61	0.074	0.2447	0.0049	0.82478	1550	16	1410	25	1750	22	1750	22	19.4286
L8_77	321	6.1	0.826	0.019	0.1003	0.0015	0.58713	611.4	9.9	615.8	8.7	594	45	615.8	8.7	0.71966
L8_78	970	2.35	6.47	0.25	0.317	0.013	0.86421	2035	33	1777	61	2324	37	2324	37	23.537
L8_79	159.1	10	1.587	0.083	0.158	0.0064	0.39717	960	33	945	35	990	110	990	110	4.54545	Rim
L8_79	133.8	59	2.012	0.084	0.1845	0.0043	0.70487	1118	30	1091	24	1164	64	1164	64	6.27148	Core
L8_80	380	1.72	0.594	0.017	0.0737	0.0018	0.70728	472	11	458	11	534	51	458	11	2.9661
L8_81	81	9.4	1.635	0.048	0.1648	0.0028	0.34017	979	19	983	16	963	61	963	61	2.07684
L8_82	866	29	0.737	0.05	0.0876	0.0046	0.41939	559	29	541	27	620	130	541	27	3.22004	Rim
L8_82	79.8	1.044	1.92	0.057	0.1882	0.003	0.30282	1083	19	1111	16	1020	58	1020	58	8.92157	Core
L8_83	282	4.19	2.132	0.062	0.1949	0.004	0.81279	1156	21	1147	22	1172	35	1172	35	2.13311
L8_84	149.4	0.7	5.35	0.16	0.3091	0.0097	0.81935	1871	26	1733	48	2025	34	2025	34	14.4198
L8_85	266.5	1.927	0.466	0.012	0.06239	0.00098	0.41455	387.5	8.5	390	5.9	367	55	390	5.9	0.645161
L8_86	658	11.3	0.576	0.026	0.0738	0.0028	0.65192	461	16	459	17	468	78	459	17	0.433839
L8_87	230	4	1.63	0.063	0.1658	0.0064	0.63266	980	25	988	35	991	88	991	88	0.302725
L8_88	143.2	1.363	1.639	0.042	0.1624	0.0031	0.58163	983	16	970	17	1005	46	1005	46	3.48259
L8_89	421	6.13	0.507	0.02	0.0638	0.002	0.59327	416	13	398	12	475	67	398	12	4.32692
L8_90	303	2.57	0.813	0.02	0.0972	0.0015	0.55742	603	11	597.8	9	608	45	597.8	9	0.862355
L8_91	391	1.112	0.713	0.033	0.0848	0.0029	0.61638	545	20	525	17	627	82	525	17	3.66972
L8_92	136.3	1.01	0.877	0.024	0.1052	0.0019	0.38918	639	13	645	11	598	58	645	11	0.938967
L8_93	231	1.894	0.818	0.019	0.0981	0.0016	0.43431	606	11	603.2	9.7	616	46	603.2	9.7	0.462046
L8_94	408.5	1.563	3.802	0.091	0.2431	0.0056	0.83912	1592	20	1401	29	1854	22	1854	22	24.4337
L8_95	711	6.23	0.544	0.012	0.0653	0.0011	0.37857	440.3	8	408	6.6	599	49	408	6.6	7.33591
L8_96	151.5	0.9	4.472	0.09	0.3036	0.0071	0.56148	1722	17	1706	35	1751	36	1751	36	2.56996
L8_97	219	0.563	0.634	0.022	0.0757	0.0021	0.60448	497	14	470	13	595	62	470	13	5.4326
L8_98	275.1	1.127	0.792	0.018	0.0947	0.0013	0.52011	591.2	9.9	582.9	7.6	615	42	582.9	7.6	1.40392
L8_99	120.1	1.046	0.956	0.031	0.0984	0.0021	0.48239	680	16	605	12	922	64	605	12	11.0294
L8_100	280	1.431	4.646	0.061	0.3139	0.0039	0.49929	1756	11	1759	19	1752	24	1752	24	0.399543
L8_101	156.1	1.081	0.705	0.028	0.0867	0.0019	0.48417	543	16	536	12	563	72	536	12	1.28913
L8_102	909	0.925	0.4818	0.0091	0.0614	0.00088	0.4898	398.7	6.2	384.1	5.3	478	39	384.1	5.3	3.6619
L8_104	147.7	1.885	1.824	0.035	0.1681	0.0022	0.46873	1052	13	1001	12	1154	35	1154	35	13.2582
L8_105	334	1.835	0.756	0.016	0.0917	0.0011	0.39031	570.6	9.1	565.7	6.7	582	41	565.7	6.7	0.858745
L8_107	300	0.991	0.785	0.021	0.0898	0.0022	0.50126	587	12	554	13	727	58	554	13	5.62181
L8_108	51.1	1.12	4.47	0.1	0.304	0.0048	0.36769	1720	19	1710	24	1730	41	1730	41	1.15607
L8_109	1140	3	0.699	0.013	0.0833	0.0013	0.49361	537.3	7.9	515.8	7.7	620	35	515.8	7.7	4.00149
L8_110	316.3	1.329	0.842	0.019	0.099	0.0015	0.49618	619	11	608.4	9	645	44	608.4	9	1.71244
L8_111	391	1.37	0.829	0.017	0.0981	0.0014	0.59947	611.5	9.5	604	8.3	642	35	604	8.3	1.22649
L8_112	91.3	1.13	0.813	0.026	0.0981	0.002	0.22359	601	15	603	12	584	67	603	12	0.332779
L8_113	124.1	1.521	0.784	0.024	0.0938	0.0016	0.1383	585	14	577.8	9.5	596	71	577.8	9.5	1.23077
L8_114	450	1.074	0.367	0.0099	0.05098	0.00079	0.40884	316.8	7.3	320.5	4.8	278	54	320.5	4.8	1.16793
L8_115	300	68	0.364	0.02	0.0497	0.0013	0.374	314	15	312.9	7.8	290	110	312.9	7.8	0.350318	Rim
L8_115	283.9	1.328	0.506	0.019	0.0649	0.0017	0.62489	415	13	405	10	446	66	405	10	2.40964	Core
L8_116	953	1.223	0.3269	0.0077	0.04471	0.0008	0.4927	286.7	5.9	281.9	5	317	47	281.9	5	1.67422
L8_117	597	6.2	0.844	0.018	0.0939	0.0016	0.72191	620	10	578.5	9.2	775	31	578.5	9.2	6.69355
L8_118	549	1.553	5.74	0.11	0.3292	0.0057	0.85964	1933	16	1833	28	2036	22	2036	22	9.97053
L8_119	491	1.78	1.734	0.039	0.1716	0.0035	0.77853	1018	15	1020	19	1008	29	1008	29	1.19048
L8_120	237	1.427	3.702	0.065	0.2644	0.005	0.69195	1569	14	1511	25	1644	27	1644	27	8.09002
L8_121	158.2	1.17	0.636	0.024	0.0771	0.0018	0.33242	498	15	478	11	591	77	478	11	4.01606
L8_122	319	1.213	0.881	0.026	0.1031	0.0023	0.62993	640	14	632	14	653	50	632	14	1.25
L8_123	380	0.838	0.788	0.017	0.0952	0.0017	0.51575	590.1	9.3	586.2	9.9	570	43	586.2	9.9	0.660905
L8_124	404	1.38	0.829	0.018	0.0966	0.0013	0.38059	613	10	594.3	7.6	671	46	594.3	7.6	3.05057
L8_125	344	2.2	0.864	0.019	0.1006	0.0017	0.55948	630	11	617	10	658	38	617	10	2.06349
L8_126	238.7	34.6	0.71	0.017	0.0862	0.0012	0.32855	543.5	9.9	533.1	7.3	565	50	533.1	7.3	1.91352
L8_127	271	2.24	1.816	0.034	0.1783	0.0033	0.5508	1049	12	1060	18	1023	37	1023	37	3.61681
L8_128	252.6	2.41	0.62	0.013	0.0763	0.0011	0.28297	488.6	8.3	474.2	6.8	535	49	474.2	6.8	2.9472
L8_129	444	0.73	0.479	0.012	0.063	0.0011	0.57876	396.8	8.2	393.5	6.9	392	49	393.5	6.9	0.831653
L8_130	189	0.911	10.01	0.15	0.4086	0.0067	0.5534	2433	13	2210	29	2609	22	2609	22	15.2932
L8_132	372	3.062	0.758	0.015	0.0922	0.0014	0.4907	571.5	8.6	568.1	8.2	556	40	568.1	8.2	0.594926
L8_133	139.6	1.892	1.729	0.039	0.1646	0.0022	0.47111	1016	14	982	12	1071	39	1071	39	8.30999
L8_134	762	0.952	0.3595	0.008	0.04946	0.00087	0.60098	311.5	5.9	311.2	5.4	292	42	311.2	5.4	0.0963082
L8_135	369	1.618	0.869	0.017	0.1009	0.0015	0.48049	635.2	8.9	620.6	9.4	662	41	620.6	9.4	2.29849
L8_137	617	1.69	1.5	0.042	0.1466	0.0028	0.75611	933	19	881	16	1026	35	1026	35	14.1326
L8_138	533	1.451	3.08	0.052	0.235	0.0035	0.73002	1426	13	1360	18	1509	22	1509	22	9.87409
L8_139	301.7	0.844	0.793	0.017	0.0931	0.0016	0.49373	594.2	9.7	573.9	9.3	656	43	573.9	9.3	3.41636
L8_140	202	2.05	1.172	0.029	0.1291	0.0022	0.69871	785	13	783	13	763	41	783	13	0.254777
L8_141	859	8.2	0.787	0.022	0.0928	0.0021	0.6929	588	13	572	12	626	45	572	12	2.72109	Rim
L8_141	254	4.14	1.639	0.047	0.1485	0.0031	0.60459	988	19	893	17	1179	47	1179	47	24.2578	Core
L8_142	567	1.868	0.755	0.026	0.0877	0.0029	0.68751	570	15	542	17	662	62	542	17	4.91228
L8_143	96.4	1.587	1.611	0.086	0.1627	0.0078	0.5793	967	34	970	43	945	94	945	94	2.6455
L8_144	698	0.931	0.81	0.021	0.0917	0.0013	0.42888	601	12	565.4	7.8	713	47	565.4	7.8	5.92346
L8_145	222	2.9	0.503	0.013	0.0648	0.001	0.21037	412.4	8.6	404.9	6.2	421	58	404.9	6.2	1.81862
L8_146	573	0.911	0.758	0.034	0.091	0.0038	0.55775	574	19	565	24	539	76	565	24	1.56794
L8_147	1620	2.24	9.39	0.27	0.3702	0.0097	0.90396	2367	27	2026	46	2662	20	2662	20	23.8918
L8_148	221	1.546	2.39	0.15	0.206	0.014	0.63389	1244	49	1204	73	1300	110	1300	110	7.38462
L8_149	585	3.34	0.633	0.016	0.073	0.0016	0.68378	498	10	454	9.8	646	48	454	9.8	8.83534
L8_150	411	13.6	0.797	0.021	0.0945	0.0021	0.69232	595	12	582	13	622	47	582	13	2.18487
L8_151	275	1.341	0.572	0.026	0.0729	0.0028	0.51094	456	16	453	17	470	99	453	17	0.657895
L8_152	894	1.099	0.881	0.017	0.1045	0.0018	0.79341	640.2	8.9	641	10	612	26	641	10	0.124961
L8_153	229	0.991	0.709	0.019	0.0857	0.0016	0.3516	544	11	529.7	9.6	584	52	529.7	9.6	2.62868
L8_154	473	0.982	2.554	0.037	0.2116	0.0028	0.71017	1286	11	1237	15	1346	24	1346	24	8.09807
L8_155	568	1.68	0.906	0.018	0.1076	0.0018	0.66755	653.9	9.6	659	10	615	33	659	10	0.779936
L8_156	785	1.195	0.682	0.016	0.0819	0.0017	0.44859	527.6	9.7	507	10	590	52	507	10	3.90447
Sample: L9				Isotopic ratios								Isotopic ages (Ma)
Grain #	[U] ppm	U/Th	207/235	2σ error	206/238	2σ error	RHO	207/235	2σ error	206/238	2σ error	207/206	2σ error	Best age	2σ error	% Discordance*	Rim/Core
L9_1	297	0.827	3.76	0.091	0.2736	0.0067	0.8587	1579	19	1556	34	1604	24	1604	24	2.99252
L9_2	1610	53	0.513	0.011	0.0665	0.0019	0.65778	420.1	7.6	415	11	432	49	415	11	1.214	Rim
L9_2	475	6	0.633	0.019	0.0794	0.002	0.58186	497	12	492	12	504	56	492	12	1.00604	Core
L9_3	93	1.54	0.727	0.039	0.0873	0.003	0.36312	550	23	539	18	570	110	539	18	2
L9_4	201	2.83	1.679	0.038	0.1667	0.0026	0.32903	997	14	993	14	995	46	995	46	0.201005
L9_5	125	0.639	1.819	0.058	0.171	0.0032	0.50632	1048	21	1017	17	1094	55	1094	55	7.03839
L9_6	422	2.114	3.633	0.076	0.2295	0.0037	0.75954	1554	16	1331	19	1860	25	1860	25	28.4409
L9_9	356	1.389	2.366	0.073	0.2001	0.0045	0.81063	1228	23	1174	24	1312	36	1312	36	10.5183
L9_10	537	2.322	13.39	0.39	0.4077	0.0087	0.74155	2703	28	2200	40	3104	30	3104	30	29.1237
L9_12	3640	2.223	0.3271	0.0072	0.04316	0.00087	0.65206	286.9	5.5	272.3	5.4	385	37	272.3	5.4	5.08888
L9_13	257	2.41	3.974	0.087	0.2853	0.0062	0.78604	1625	18	1616	31	1626	25	1626	25	0.615006
L9_14	447	2.49	1.648	0.038	0.1565	0.003	0.58162	986	14	937	17	1093	39	1093	39	14.2726
L9_15	786	4.65	0.3735	0.007	0.05029	0.00066	0.56629	321.8	5.2	316.3	4.1	334	35	316.3	4.1	1.70914
L9_16	510	1.498	3.97	0.095	0.2815	0.0058	0.78573	1625	19	1598	29	1652	27	1652	27	3.26877
L9_17	616	1.416	4.42	0.1	0.2972	0.0082	0.69199	1710	19	1673	41	1758	34	1758	34	4.83504
L9_18	853	9.65	0.4446	0.0089	0.05779	0.00084	0.37878	372.9	6.3	362.1	5.1	412	44	362.1	5.1	2.89622
L9_19	317	5.64	1.263	0.031	0.1351	0.0024	0.59876	826	14	816	13	833	41	816	13	1.21065
L9_20	1630	4.364	0.3678	0.0061	0.04898	0.0006	0.36382	317.7	4.5	308.2	3.7	361	37	308.2	3.7	2.99024
L9_21	110	4.4	0.844	0.041	0.1031	0.003	0.32612	620	24	632	18	540	100	632	18	1.93548
L9_22	228	1.74	0.806	0.026	0.0927	0.0022	0.35844	601	16	571	13	671	67	571	13	4.99168
L9_23	781	2.99	3.383	0.089	0.259	0.0065	0.77145	1496	21	1483	34	1505	33	1505	33	1.46179
L9_24	142	1.349	1.749	0.048	0.1655	0.0042	0.58639	1022	18	986	23	1096	49	1096	49	10.0365
L9_25	217.5	1.374	6.45	0.12	0.3643	0.0061	0.52093	2036	17	2001	29	2056	31	2056	31	2.6751
L9_26	255	0.913	0.883	0.021	0.1035	0.0021	0.40592	641	11	634	12	639	51	634	12	1.09204
L9_27	1108	1.46	5.51	0.15	0.3201	0.008	0.82115	1898	23	1788	39	2010	28	2010	28	11.0448
L9_28	214.5	2.025	2.302	0.048	0.2021	0.0037	0.62057	1210	15	1188	19	1236	36	1236	36	3.8835
L9_29	236	0.791	0.738	0.02	0.0839	0.0016	0.60826	560	12	518.9	9.4	706	45	518.9	9.4	7.33929
L9_30	1168	4.26	1.65	0.12	0.1617	0.0092	0.72699	980	45	964	51	995	98	995	98	3.11558	Rim
L9_30	637	1.145	3.665	0.064	0.2578	0.0046	0.47235	1562	14	1478	24	1647	37	1647	37	10.2611	Core
L9_31	113.2	1.108	6.46	0.17	0.3511	0.0094	0.52141	2038	24	1936	45	2165	44	2165	44	10.5774
L9_32	1179	0.769	0.5089	0.0097	0.0652	0.0013	0.65037	417	6.5	407.1	7.7	455	39	407.1	7.7	2.3741
L9_33	259	2.75	0.806	0.042	0.0854	0.0037	0.63655	594	24	527	22	829	79	527	22	11.2795
L9_34	115.7	1.027	0.59	0.021	0.0729	0.0016	0.49812	470	14	453.2	9.7	508	70	453.2	9.7	3.57447
L9_35	263	4.82	0.681	0.037	0.0775	0.0033	0.13118	526	22	481	20	680	140	481	20	8.55513	Rim
L9_35	314	1.11	1.019	0.024	0.1177	0.0019	0.5274	713	12	717	11	668	45	717	11	0.56101	Core
L9_36	615	1.668	4.323	0.064	0.2946	0.0044	0.74312	1696	12	1664	22	1724	20	1724	20	3.48028
L9_37	236	0.998	1.781	0.039	0.1734	0.0032	0.6212	1037	15	1030	17	1038	44	1038	44	0.770713
L9_38	1210	2.975	1.89	0.031	0.1819	0.0029	0.8114	1076	11	1077	16	1058	20	1058	20	1.79584
L9_39	874	9.23	1.175	0.079	0.1254	0.0081	0.61203	784	37	760	46	830	120	760	46	3.06122	Rim
L9_39	328	2.525	2.782	0.068	0.2206	0.0052	0.83099	1348	18	1284	27	1434	28	1434	28	10.4603	Core
L9_40	451	2.152	3.041	0.067	0.2463	0.0049	0.60375	1416	17	1422	25	1390	33	1390	33	2.30216
L9_41	135.6	0.744	0.68	0.028	0.0849	0.0025	0.11829	525	17	525	15	520	110	525	15	0	Rim
L9_41	192.1	1.145	0.89	0.03	0.1033	0.0015	0.21186	644	16	633.5	9	648	75	633.5	9	1.63043	Core
L9_42	840	2	0.823	0.016	0.098	0.0017	0.6438	608.6	9.1	602	10	611	39	602	10	1.08446
L9_43	354	3.659	3.139	0.084	0.251	0.0069	0.82652	1439	21	1442	36	1423	30	1423	30	1.33521
L9_44	443	4.04	17.8	0.22	0.5674	0.0079	0.75668	2977	12	2895	32	3019	15	3019	15	4.10732
L9_45	447	5.47	0.3516	0.0086	0.04762	0.00069	0.29403	305.3	6.4	299.8	4.3	319	54	299.8	4.3	1.80151
L9_46	41.2	0.508	0.907	0.068	0.0909	0.002	0.22746	640	33	561	12	890	150	561	12	12.3437
L9_48	1640	16.4	0.326	0.031	0.0428	0.0038	0.84646	285	23	270	24	370	110	270	24	5.26316	Rim
L9_48	1255	4.39	0.679	0.015	0.083	0.0015	0.74058	524.9	9	513.8	9	552	33	513.8	9	2.11469	Core
L9_49	143	1.245	1.894	0.046	0.1766	0.0026	0.4634	1077	16	1048	14	1113	42	1113	42	5.84007
L9_50	537	4.53	3.837	0.066	0.2904	0.0049	0.74748	1597	14	1642	24	1535	25	1535	25	6.97068
L9_51	983	0.92	0.478	0.012	0.0622	0.0018	0.3418	396.2	8.3	389	11	420	71	389	11	1.81726
L9_52	294	1.013	4.169	0.079	0.2938	0.0061	0.57517	1664	16	1663	29	1667	35	1667	35	0.239952
L9_53	261	1.6	0.411	0.013	0.0555	0.0011	0.36639	348.6	9.1	348	6.6	326	64	348	6.6	0.172117
L9_54	389	1.687	0.777	0.02	0.0945	0.0014	0.49384	582	11	581.9	8.5	555	49	581.9	8.5	0.0171821
L9_55	306	1.203	0.596	0.015	0.074	0.0013	0.50242	473.5	9.6	460.3	7.8	506	50	460.3	7.8	2.78775
L9_56	609	1.121	4.93	0.12	0.3103	0.0047	0.70763	1803	20	1741	23	1845	29	1845	29	5.63686
L9_57	937	2.53	3.6	0.054	0.2621	0.0039	0.84964	1547	12	1499	20	1603	18	1603	18	6.48784
L9_58	319	4.94	0.726	0.02	0.0898	0.0017	0.59115	552	12	554	10	526	49	554	10	0.362319
L9_59	400	4.24	1.205	0.046	0.1332	0.0037	0.47318	804	23	806	21	778	79	806	21	0.248756
L9_60	93	1.76	0.945	0.054	0.1091	0.0058	0.62825	670	29	666	34	670	110	666	34	0.597015
L9_61	698	7	0.878	0.046	0.1033	0.0054	0.79447	638	25	633	32	646	76	633	32	0.783699	Rim
L9_61	129.2	1.609	2.043	0.088	0.1919	0.0034	0.43607	1126	29	1131	18	1091	80	1091	80	3.66636	Core
L9_62	1138	2.13	0.769	0.017	0.0958	0.0019	0.63809	579.1	9.8	590	11	518	39	590	11	1.88223
L9_63	261.8	2.17	6.36	0.2	0.3431	0.009	0.66359	2016	26	1897	43	2136	42	2136	42	11.1891
L9_64	579	3.17	1.661	0.043	0.154	0.0035	0.79505	998	16	922	20	1159	37	1159	37	20.4487
L9_66	65.6	1.053	3.036	0.066	0.2465	0.004	0.56504	1415	16	1419	21	1387	38	1387	38	2.30714
L9_67	342	0.67	0.857	0.017	0.1028	0.0016	0.39502	627.4	9.5	630.4	9.4	601	44	630.4	9.4	0.478164
L9_68	836	10	0.764	0.033	0.092	0.0037	0.46198	575	19	567	22	594	92	567	22	1.3913	Rim
L9_68	422	1.44	0.872	0.046	0.1087	0.0052	0.71726	635	25	665	30	517	90	665	30	4.72441	Core
L9_69	616	9.6	0.386	0.015	0.0515	0.0015	0.56187	331	11	323.8	9.2	366	86	323.8	9.2	2.17523	Rim
L9_69	180.9	1.065	0.693	0.023	0.0863	0.0017	0.38557	533	14	533.3	9.9	511	72	533.3	9.9	0.0562852	Core
L9_70	531	1.502	0.837	0.031	0.0995	0.0033	0.71001	614	17	611	19	621	68	611	19	0.488599
L9_71	549	1.177	0.605	0.018	0.0753	0.002	0.51067	478	11	467	12	520	61	467	12	2.30126
L9_72	378	1.384	0.555	0.014	0.0719	0.0012	0.56918	447	8.9	447.3	7.3	432	45	447.3	7.3	0.0671141
L9_73	33.7	1.924	2.389	0.079	0.2098	0.0051	0.43732	1231	24	1226	27	1221	62	1221	62	0.4095
L9_74	207	2.29	0.632	0.025	0.0789	0.0023	0.56894	494	15	489	14	501	70	489	14	1.01215
L9_75	225.7	3.63	0.749	0.021	0.0876	0.0022	0.43293	566	12	541	13	639	60	541	13	4.41696
L9_76	409	0.676	3.244	0.052	0.2466	0.0037	0.63812	1466	13	1420	19	1536	27	1536	27	7.55208
L9_77	357	1.65	12.06	0.21	0.5001	0.0076	0.92588	2605	18	2612	33	2597	20	2597	20	0.57759
L9_78	592	14.8	0.816	0.031	0.0963	0.0032	0.4222	605	17	593	19	641	81	593	19	1.98347	Rim
L9_78	370	4.52	5.46	0.19	0.317	0.012	0.91615	1891	30	1773	58	2021	26	2021	26	12.2712	Core
L9_79	222.8	4.94	6.88	0.14	0.3294	0.0056	0.57716	2096	18	1834	27	2355	30	2355	30	22.1231
L9_80	355	0.706	0.829	0.025	0.0979	0.0026	0.6664	610	14	602	15	637	53	602	15	1.31148		euhedral
L9_81	398	2.78	0.547	0.018	0.0677	0.0018	0.58907	441	12	422	11	518	57	422	11	4.30839
L9_82	659	8.38	1.597	0.053	0.155	0.004	0.65063	967	21	929	22	1065	49	1065	49	12.77	Rim
L9_82	411	1.66	2.818	0.062	0.2224	0.0041	0.6831	1358	17	1294	22	1458	32	1458	32	11.2483	Core
L9_83	150.1	0.697	14.38	0.28	0.536	0.011	0.64689	2770	18	2761	44	2782	26	2782	26	0.754853
L9_84	525	1.94	2.117	0.039	0.1945	0.003	0.671	1156	13	1145	16	1180	29	1180	29	2.9661
L9_85	583	0.592	0.792	0.018	0.0894	0.0013	0.47915	591	10	551.9	7.7	732	43	551.9	7.7	6.61591
L9_86	696	4.44	0.604	0.028	0.0766	0.0037	0.80723	477	17	475	22	498	63	475	22	0.419287
L9_87	572	2.98	1.091	0.023	0.122	0.0021	0.51784	748	11	742	12	763	43	742	12	0.802139
L9_88	742	10.8	1.16	0.13	0.125	0.011	0.80501	776	59	756	62	830	140	756	62	2.57732	Rim
L9_88	390	1.488	2.371	0.042	0.2149	0.0029	0.44515	1232	13	1254	16	1196	32	1196	32	4.8495	Core
L9_89	130.7	2.56	0.714	0.022	0.0881	0.0016	0.20048	547	12	544.2	9.5	527	68	544.2	9.5	0.511883
L9_90	760	2.52	5.89	0.18	0.3265	0.0091	0.86503	1955	26	1817	44	2113	27	2113	27	14.0085
L9_91	152.7	2.57	3.59	0.076	0.2612	0.0045	0.59452	1543	17	1495	23	1611	35	1611	35	7.2005
L9_92	632	1.043	2.972	0.058	0.2169	0.004	0.39698	1399	15	1265	21	1612	39	1612	39	21.5261
L9_93	155	1.05	0.508	0.025	0.0659	0.0017	0.46832	414	17	411	10	412	99	411	10	0.724638
L9_94	909	26	2.485	0.083	0.2021	0.0066	0.8033	1266	25	1184	35	1408	37	1408	37	15.9091
L9_95	429	1.047	0.773	0.02	0.0936	0.0019	0.5361	580	12	577	11	587	51	577	11	0.517241
L9_96	176	5.1	1.708	0.042	0.1734	0.0037	0.58908	1008	16	1030	20	957	45	957	45	7.628
L9_97	601	0.991	0.525	0.016	0.0671	0.0018	0.57355	427	10	419	11	471	54	419	11	1.87354
L9_98	1216	2.006	2.498	0.039	0.2063	0.003	0.80686	1270	11	1209	16	1375	18	1375	18	12.0727
L9_99	595	2.113	4.87	0.2	0.272	0.011	0.82322	1791	34	1550	56	2093	45	2093	45	25.9436
L9_100	119	1.519	0.725	0.026	0.0891	0.0016	0.33461	552	16	549.9	9.6	534	76	549.9	9.6	0.380435
L9_101	477	6.07	4.06	0.16	0.268	0.01	0.42805	1644	33	1530	50	1789	74	1789	74	14.4774	Rim
L9_101	29.3	0.986	6.67	0.29	0.3603	0.0095	0.63057	2060	39	1982	45	2123	61	2123	61	6.64154	Core
L9_102	158.9	1.873	0.321	0.013	0.04531	0.00089	0.36079	283	10	285.6	5.5	267	83	285.6	5.5	0.918728
L9_103	1300	217	0.699	0.079	0.0844	0.0087	0.72345	532	47	521	52	580	160	521	52	2.06767	Rim
L9_103	969	2.19	2.132	0.064	0.193	0.0043	0.82033	1155	21	1137	23	1199	35	1199	35	5.17098	Core
L9_104	451	2.64	2.233	0.073	0.2002	0.0054	0.86432	1183	24	1179	28	1208	33	1208	33	2.40066
L9_105	477	1.82	15.82	0.61	0.555	0.016	0.85941	2845	37	2846	68	2851	32	2851	32	0.175377
L9_106	487	2.65	0.888	0.027	0.0992	0.0026	0.55261	643	15	610	15	756	58	610	15	5.13219
L9_107	865	1.854	0.761	0.014	0.0907	0.0014	0.52808	573.5	7.9	559.6	8.5	618	37	559.6	8.5	2.42371
L9_108	191	1.55	9.96	0.32	0.455	0.013	0.86645	2425	31	2412	59	2435	28	2435	28	0.944559
L9_109	340	1.43	0.857	0.024	0.1019	0.002	0.61727	626	13	625	12	601	49	625	12	0.159744
L9_110	192.2	2.07	1.445	0.039	0.1452	0.0027	0.65306	903	17	873	15	997	41	997	41	12.4373
L9_111	280	2.11	0.979	0.021	0.1132	0.002	0.53004	691	11	691	11	685	42	691	11	0
L9_112	468	1.853	1.492	0.046	0.1471	0.0031	0.89336	924	19	884	17	1015	34	1015	34	12.9064
L9_113	676	1.343	0.5335	0.0096	0.06846	0.00081	0.25484	433.6	6.3	426.8	4.9	459	41	426.8	4.9	1.56827
L9_114	546	2.7	0.4084	0.0083	0.05477	0.00091	0.39311	347.2	5.9	343.7	5.6	369	46	343.7	5.6	1.00806		euhedral
L9_115	113.2	1.475	3.832	0.085	0.277	0.0045	0.58481	1599	19	1575	22	1628	36	1628	36	3.25553
L9_116	533	1.23	1.071	0.02	0.1213	0.0018	0.667	737.7	9.9	738	11	741	31	738	11	0.0406669
L9_117	429	1.371	0.537	0.013	0.0699	0.0013	0.39189	435.6	8.6	435.6	7.9	425	53	435.6	7.9	0
L9_118	311	1.29	0.588	0.015	0.0769	0.0014	0.59772	469.2	9.6	477.4	8.5	421	46	477.4	8.5	1.74766
L9_119	129.6	2.092	2.468	0.044	0.2128	0.0034	0.43	1260	13	1243	18	1294	33	1294	33	3.94127
L9_120	593	25	0.98	0.018	0.1115	0.0016	0.65165	692.6	9.1	681.1	9.5	720	29	681.1	9.5	1.66041
L9_121	454	1.844	1.085	0.02	0.121	0.0021	0.70076	744.8	9.9	736	12	777	32	736	12	1.18153
L9_122	256.1	1.512	2.114	0.032	0.1919	0.0029	0.43408	1152	10	1131	16	1185	30	1185	30	4.55696
L9_123	337.9	1.847	3.303	0.068	0.2481	0.0037	0.64233	1480	16	1428	19	1557	30	1557	30	8.28516
L9_124	155.3	1.791	0.7	0.1	0.0787	0.0033	0.1787	528	51	488	20	650	180	488	20	7.57576
L9_125	571	1.445	0.4927	0.0095	0.06449	0.00088	0.43129	406.1	6.5	402.8	5.3	416	41	402.8	5.3	0.812608
L9_126	191.1	2.356	1.663	0.03	0.1677	0.0022	0.54391	994	12	1001	13	977	35	977	35	2.4565
L9_127	116.1	1.4	2.02	0.063	0.186	0.0033	0.40912	1116	22	1099	18	1144	56	1144	56	3.93357
L9_128	722	1.41	0.5364	0.0097	0.0688	0.0011	0.62088	435.4	6.4	429.9	6.6	467	33	429.9	6.6	1.26321
L9_129	1700	5.96	0.409	0.02	0.0528	0.0017	0.81031	347	14	332	10	440	67	332	10	4.32277	Rim
L9_129	447	0.724	0.827	0.019	0.1013	0.0019	0.65419	611	11	622	11	576	37	622	11	1.80033	Core
L9_130	145.7	0.816	1.741	0.036	0.167	0.0023	0.4199	1021	13	995	13	1071	39	1071	39	7.09617
L9_131	1357	1.39	0.591	0.041	0.0738	0.0051	0.69579	470	26	459	31	520	110	459	31	2.34043
L9_132	240	1.822	4.414	0.076	0.3063	0.0042	0.63483	1713	14	1722	21	1700	25	1700	25	1.29412
L9_133	599	3	0.698	0.019	0.0863	0.0021	0.7434	536	12	533	13	554	43	533	13	0.559701
L9_134	143.8	2.462	0.79	0.025	0.0961	0.0019	0.34093	588	15	591	11	558	69	591	11	0.510204
L9_135	296	2.85	11.74	0.29	0.4807	0.0097	0.78974	2578	24	2526	42	2626	27	2626	27	3.80807
L9_136	1153	1.62	0.4091	0.0077	0.05452	0.00098	0.51654	348.5	5.7	342.1	6	392	40	342.1	6	1.83644
L9_137	240	0.618	0.488	0.021	0.0625	0.0011	0.27172	403	14	391	6.8	448	83	391	6.8	2.97767		euhedral
L9_138	844	5.84	0.833	0.022	0.0977	0.0032	0.64511	614	12	604	18	667	51	604	18	1.62866	Rim
L9_138	319	2.79	1.004	0.037	0.1133	0.0038	0.66613	704	19	692	22	745	60	692	22	1.70455	Core
L9_139	267	0.651	2.595	0.094	0.2235	0.0082	0.67572	1297	27	1300	43	1298	60	1298	60	0.154083
L9_140	204.3	1.292	4.18	0.1	0.2802	0.0074	0.71779	1664	21	1589	37	1779	36	1779	36	10.6802
L9_141	1229	5.12	0.467	0.01	0.0632	0.0012	0.67672	388.5	7	395	7.1	348	39	395	7.1	1.6731
L9_142	581	0.863	0.784	0.019	0.0937	0.002	0.24865	588	11	577	12	640	41	577	12	1.87075
L9_143	113.8	0.746	0.535	0.023	0.0727	0.002	0.40805	431	15	452	12	327	84	452	12	4.87239		euhedral
L9_144	505	2.546	3.155	0.056	0.2458	0.0036	0.6264	1443	14	1416	19	1497	28	1497	28	5.41082
L9_145	245	5.51	0.895	0.028	0.1032	0.002	0.36295	649	15	633	11	691	65	633	11	2.46533
L9_146	567	2.346	0.627	0.014	0.0768	0.0013	0.48996	492.8	8.8	476.6	7.9	564	46	476.6	7.9	3.28734
L9_148	581	1.18	0.499	0.012	0.0672	0.0013	0.55099	410.3	7.8	419.1	7.8	365	45	419.1	7.8	2.14477		euhedral
L9_149	480	1.95	2.542	0.063	0.2196	0.0051	0.71116	1279	19	1278	27	1287	36	1287	36	0.699301
L9_150	502	2.219	3.075	0.07	0.2354	0.0041	0.62968	1423	17	1362	21	1527	33	1527	33	10.8055
L9_151	323	1.56	0.458	0.017	0.0554	0.0014	0.21246	380	12	347.4	8.3	574	84	347.4	8.3	8.57895		euhedral
L9_152	77.3	3.75	5.95	0.12	0.338	0.0063	0.48191	1967	17	1876	30	2072	34	2072	34	9.45946
L9_153	259	3.66	0.717	0.02	0.088	0.0019	0.59238	547	11	544	11	574	49	544	11	0.548446
L9_154	203	0.624	0.93	0.16	0.1043	0.0052	0.13065	678	86	639	31	730	300	639	31	5.75221
L9_155	69.8	0.911	4.308	0.086	0.2941	0.0043	0.54186	1691	16	1661	21	1744	32	1744	32	4.75917
L9_156	101	1.081	29.36	0.55	0.665	0.014	0.66008	3460	18	3288	55	3574	25	3574	25	8.00224
L9_157	343	1.097	3.062	0.09	0.2301	0.0054	0.8421	1418	22	1333	28	1568	32	1568	32	14.9872
L9_158	132.8	3.2	9.16	0.27	0.385	0.011	0.76074	2349	27	2095	51	2596	35	2596	35	19.2989
Sample: W1				Isotopic ratios								Isotopic ages (Ma)
Grain #	[U] ppm	U/Th	207/235	2σ error	206/238	2σ error	RHO	207/235	2σ error	206/238	2σ error	207/206	2σ error	Best age	2σ error	% Discordance*	Rim/Core
W1_1	169.1	2.763	2.232	0.038	0.1991	0.0019	0.50602	1190	12	1170	10	1206	29	1206	29	2.98507
W1_2	116	5.34	0.656	0.054	0.0798	0.005	0.61272	506	33	494	30	550	140	494	30	2.37154	Rim
W1_2	136.9	1.35	1.9	0.048	0.1788	0.0032	0.4713	1078	17	1060	18	1104	47	1104	47	3.98551	Core
W1_4	189.3	1.57	0.772	0.019	0.0938	0.0014	0.32217	579	11	577.8	8.5	556	52	577.8	8.5	0.207254
W1_5	459	1.04	3.819	0.054	0.2758	0.0033	0.6524	1594	11	1569	17	1623	21	1623	21	3.32717
W1_6	564	0.98	1.539	0.031	0.149	0.0023	0.56143	945	13	895	13	1051	35	1051	35	14.843
W1_7	463	5.31	6.36	0.36	0.35	0.023	0.70018	2022	50	1930	110	2114	85	2114	85	8.70388	Rim
W1_7	145.5	0.595	13.54	0.17	0.5146	0.0067	0.53369	2716	12	2674	29	2740	20	2740	20	2.40876	Core
W1_8	39.7	2.31	11.29	0.23	0.4669	0.0089	0.41522	2544	18	2471	38	2588	34	2588	34	4.52087
W1_9	236	3.66	1.762	0.034	0.1676	0.0026	0.36028	1030	12	998	14	1085	40	1085	40	8.01843
W1_10	150.2	10.5	8.61	0.62	0.407	0.016	0.81568	2285	67	2199	75	2357	84	2357	84	6.70344	Rim
W1_10	82.6	1.21	12.29	0.32	0.502	0.011	0.79676	2624	26	2617	49	2626	28	2626	28	0.342727	Core
W1_11	225	1.326	3.321	0.077	0.2586	0.0058	0.7492	1482	18	1481	30	1479	31	1479	31	0.135227
W1_12	613	3.357	2.026	0.03	0.1903	0.0029	0.61604	1122	10	1122	16	1119	27	1119	27	0.268097
W1_13	242	2.564	3.181	0.057	0.2549	0.0048	0.62076	1449	14	1462	24	1432	31	1432	31	2.09497
W1_14	287	2.76	0.674	0.017	0.0795	0.0013	0.46446	521	10	493.1	8	623	51	493.1	8	5.35509
W1_15	251	3.73	0.857	0.03	0.099	0.0025	0.31098	623	16	610	15	663	74	610	15	2.08668
W1_16	388.3	0.79	10.15	0.14	0.4338	0.0062	0.69177	2446	12	2320	28	2551	19	2551	19	9.05527
W1_17	1731	12.68	0.695	0.011	0.0851	0.0011	0.67161	535.1	6.6	526.6	6.8	561	25	526.6	6.8	1.58849
W1_18	135.7	1.108	1.884	0.039	0.1808	0.0025	0.38367	1072	14	1071	13	1062	42	1062	42	0.847458
W1_19	152.2	1.92	0.537	0.016	0.06798	0.00096	0.31514	434	10	423.8	5.8	465	61	423.8	5.8	2.35023
W1_20	361	1.166	0.729	0.013	0.08892	0.00088	0.17099	556	7.2	549.1	5.2	562	40	549.1	5.2	1.24101
W1_21	388	1.258	0.494	0.015	0.0652	0.0013	0.50192	406	10	407.3	8.1	396	60	407.3	8.1	0.320197
W1_22	470	31.8	0.829	0.046	0.1023	0.0054	0.73029	609	26	627	32	549	92	627	32	2.95567
W1_23	669	0.9055	10.98	0.12	0.4441	0.0049	0.76901	2519.2	9.8	2368	22	2647	12	2647	12	10.5402
W1_24	67.8	0.693	5.6	0.098	0.3313	0.0046	0.50442	1912	15	1843	22	1985	28	1985	28	7.15365
W1_25	47.9	5.8	1.367	0.053	0.142	0.0028	0.27069	867	22	855	16	866	79	866	79	1.27021
W1_26	609	2.98	1.798	0.04	0.1672	0.0038	0.39686	1043	14	996	21	1146	35	1146	35	13.089
W1_27	205.6	3.14	1.821	0.046	0.171	0.0032	0.59036	1048	16	1017	17	1117	42	1117	42	8.95255
W1_28	275.8	1.68	1.706	0.033	0.16	0.0021	0.4919	1008	12	956	12	1128	35	1128	35	15.2482
W1_29	155.5	3.344	1.307	0.03	0.1387	0.0018	0.49001	846	13	837	10	863	43	837	10	1.06383
W1_30	136	1.362	2.617	0.056	0.2277	0.0044	0.41948	1301	16	1324	23	1264	44	1264	44	4.74684
W1_31	249	5.21	2.19	0.071	0.1924	0.0062	0.64483	1168	22	1131	34	1265	54	1265	54	10.5929
W1_32	297	1.834	2.277	0.042	0.1927	0.0035	0.60479	1204	13	1135	19	1338	32	1338	32	15.1719
W1_33	187	0.708	5.382	0.076	0.3425	0.0044	0.56212	1879	12	1897	21	1869	22	1869	22	1.49813
W1_34	550	5.71	1.91	0.094	0.1833	0.007	0.56582	1081	33	1084	38	1055	91	1055	91	2.74882	Rim
W1_34	323.3	2.941	2.278	0.034	0.2027	0.0026	0.5568	1204	11	1191	14	1233	26	1233	26	3.40633	Core
W1_35	217.4	1.354	0.633	0.018	0.08	0.0019	0.34747	497	12	496	11	488	66	496	11	0.201207
W1_36	1536	11.42	0.671	0.021	0.0833	0.0021	0.47872	521	13	516	13	547	66	516	13	0.959693
W1_37	25.39	3.393	2.098	0.077	0.1907	0.0034	0.1921	1139	25	1124	18	1149	76	1149	76	2.17581
W1_38	325	2.19	1.981	0.029	0.1852	0.0021	0.46115	1107	10	1095	11	1147	26	1147	26	4.53357
W1_39	319	2.925	4.481	0.049	0.3014	0.0033	0.64772	1725.8	9	1697	16	1772	17	1772	17	4.23251
W1_40	409	2.66	1.372	0.026	0.1475	0.0024	0.56404	875	11	886	14	852	35	852	35	3.99061
W1_41	120.8	2.14	24.33	0.58	0.649	0.015	0.73976	3272	24	3216	57	3328	26	3328	26	3.36538
W1_42	180	0.908	0.632	0.018	0.0789	0.0011	0.34926	495	11	489.5	6.4	510	60	489.5	6.4	1.11111
W1_43	298.2	1.77	2.02	0.045	0.1861	0.0044	0.62737	1118	15	1099	24	1163	41	1163	41	5.50301
W1_44	159	1.72	0.669	0.019	0.0835	0.0012	0.18859	518	11	516.8	7.4	511	62	516.8	7.4	0.23166
W1_45	206.9	2.4	22.47	0.31	0.5837	0.0075	0.75692	3201	13	2961	31	3359	15	3359	15	11.8488
W1_46	384	1.96	0.624	0.013	0.0792	0.001	0.39964	491.1	7.8	491.4	6	486	42	491.4	6	0.0610874
W1_47	135.2	2.381	6.66	0.11	0.377	0.0052	0.59284	2066	15	2061	24	2070	25	2070	25	0.434783
W1_48	156	2.63	2.626	0.068	0.2316	0.0055	0.6022	1302	19	1341	29	1248	44	1248	44	7.45192
W1_49	341	2.03	2.303	0.032	0.2049	0.0025	0.58936	1211.5	9.7	1201	13	1228	23	1228	23	2.1987
W1_50	110.1	1.223	0.766	0.025	0.0927	0.0018	0.29509	576	15	571	11	575	74	571	11	0.868056
W1_51	27.18	0.761	1.451	0.067	0.1405	0.0039	0.27894	900	28	846	22	1019	95	846	22	6
W1_52	224	3.27	1.69	0.041	0.1647	0.0035	0.50654	1004	16	982	19	1054	48	1054	48	6.83112
W1_53	416	1.26	1.326	0.029	0.1311	0.0024	0.62611	855	13	794	14	1024	34	794	14	7.1345
W1_54	219	0.929	0.555	0.026	0.069	0.0019	0.30055	447	17	430	12	520	110	430	12	3.80313
W1_55	183	2.19	2.016	0.035	0.1857	0.0025	0.5141	1118	12	1098	13	1160	32	1160	32	5.34483
W1_56	104.3	1.678	3.213	0.073	0.2493	0.0037	0.32343	1462	17	1434	19	1492	42	1492	42	3.8874
W1_57	163.9	1.341	1.536	0.031	0.1556	0.0026	0.42866	942	12	933	15	961	42	961	42	2.91363
W1_58	63.4	1.722	2.821	0.064	0.2341	0.0032	0.29405	1356	18	1355	17	1347	47	1347	47	0.593912
W1_59	152.3	2.237	2.98	0.1	0.2357	0.0098	0.66432	1396	27	1363	52	1483	59	1483	59	8.09171
W1_60	368	1.468	12.08	0.18	0.4674	0.0067	0.71758	2608	14	2471	29	2711	18	2711	18	8.85282
W1_61	548	4.04	0.919	0.018	0.1049	0.0016	0.61234	659.9	9.6	643	9.2	710	35	643	9.2	2.56099
W1_62	373	2.28	1.857	0.026	0.1788	0.002	0.508	1064.3	9.1	1060	11	1069	25	1069	25	0.841908
W1_63	42.18	1.022	2.768	0.08	0.2255	0.004	0.18258	1342	21	1310	21	1368	61	1368	61	4.23977
W1_64	363	1.73	1.482	0.025	0.1496	0.0023	0.57097	921	10	898	13	973	32	973	32	7.70812
W1_65	289	1.11	3.802	0.051	0.27	0.0031	0.55744	1593	10	1540	15	1652	22	1652	22	6.77966
W1_66	25.16	2.886	1.248	0.073	0.1306	0.0046	0.16405	808	33	790	26	840	130	790	26	2.22772
W1_67	207.6	2.785	1.72	0.032	0.1635	0.002	0.38362	1013	12	976	11	1083	35	1083	35	9.87996
W1_68	326	3.501	0.881	0.017	0.1041	0.0016	0.39708	642.5	9.4	638.3	9.4	641	42	638.3	9.4	0.653696
W1_69	331.3	9.04	0.935	0.044	0.1072	0.0046	0.52508	668	23	656	27	704	97	656	27	1.79641	Rim
W1_69	144.4	5.47	1.279	0.04	0.1327	0.0033	0.28904	834	18	803	19	910	70	803	19	3.71703	Core
W1_70	425	6.31	1.756	0.059	0.1744	0.0061	0.6354	1032	23	1035	33	1023	62	1023	62	1.17302
W1_75	144.7	9.3	1.242	0.038	0.1256	0.0025	0.90803	781	15	756	14	810	22	756	14	3.20102
W1_71	361.3	4.62	1.811	0.027	0.173	0.002	0.51352	1049.1	9.5	1028	11	1073	26	1073	26	4.19385
W1_72	1382	8.23	4.11	0.11	0.261	0.007	0.74287	1654	22	1494	36	1864	34	1864	34	19.8498
W1_73	583	1.511	0.495	0.01	0.06499	0.00084	0.521	407.7	6.9	405.9	5.1	403	40	405.9	5.1	0.441501
W1_74	642	1.39	1.008	0.013	0.1152	0.001	0.43899	706.7	6.8	702.8	6	716	27	702.8	6	0.551861
W1_75	94	0.601	1.862	0.065	0.1755	0.0051	0.44001	1064	23	1041	28	1120	74	1120	74	7.05357
W1_76	59.5	0.688	1.776	0.05	0.1739	0.0033	0.2681	1030	18	1033	18	1014	59	1014	59	1.87377
W1_77	634	1.844	0.745	0.012	0.0924	0.0011	0.4532	564.2	7	569.8	6.5	532	34	569.8	6.5	0.992556
W1_78	128	2.57	0.674	0.029	0.085	0.0015	0.10842	522	18	525.9	9.2	464	88	525.9	9.2	0.747126
W1_79	251.9	0.875	0.707	0.016	0.0875	0.0012	0.47505	541	9.4	540.4	6.8	532	43	540.4	6.8	0.110906
W1_80	220	3.38	0.571	0.038	0.0707	0.0042	0.50173	455	24	440	25	520	120	440	25	3.2967	Rim
W1_80	212.4	4.64	0.891	0.039	0.1014	0.0028	0.6519	644	21	622	16	747	75	622	16	3.41615	Core
W1_81	522	6.11	3.046	0.036	0.2459	0.0026	0.61371	1417.7	9	1417	13	1421	19	1421	19	0.281492
W1_82	333.8	1.355	1.115	0.028	0.1165	0.0024	0.58355	757	13	712	14	896	41	712	14	5.94452
W1_83	392	1.622	3.695	0.043	0.2773	0.0031	0.58316	1568.6	9.3	1577	15	1558	20	1558	20	1.21951
W1_84	355	3.67	4.452	0.094	0.2983	0.0067	0.62097	1716	18	1680	33	1772	33	1772	33	5.19187
W1_85	140.5	2.134	2.719	0.048	0.2248	0.0029	0.58499	1332	13	1308	16	1377	29	1377	29	5.01089
W1_86	135.5	2.182	1.498	0.031	0.1533	0.0021	0.1865	927	13	919	12	937	49	937	49	1.92102
W1_87	1098	4.76	1.158	0.036	0.1198	0.0033	0.51691	779	17	729	19	935	54	729	19	6.41849	Rim
W1_87	478	1.781	1.859	0.053	0.176	0.004	0.56241	1064	19	1045	22	1102	49	1102	49	5.17241	Core
W1_88	636	14.63	0.608	0.011	0.0764	0.001	0.52794	481.6	7.2	474.4	6.1	512	35	474.4	6.1	1.49502
W1_89	92	2.08	0.944	0.06	0.1061	0.0036	0.10126	671	31	649	21	720	150	649	21	3.27869
W1_90	648	4.05	0.599	0.022	0.0763	0.0029	0.57749	474	14	473	18	472	73	473	18	0.21097
W1_91	19.33	1.969	1.554	0.075	0.1567	0.0035	0.073726	944	29	937	19	910	110	910	110	2.96703
W1_92	114.4	1.176	0.543	0.017	0.0695	0.0012	0.23056	439	11	433	7.5	447	69	433	7.5	1.36674
W1_93	518	5.32	0.903	0.086	0.0984	0.0069	0.39143	651	44	605	40	810	170	605	40	7.06605	Rim
W1_93	156.3	1.575	1.305	0.035	0.14	0.0026	0.48683	844	16	844	15	835	51	844	15	0	Core
W1_94	256.6	1.83	4.111	0.074	0.2931	0.005	0.59738	1653	15	1655	25	1655	29	1655	29	0
W1_95	772	9.59	1.777	0.067	0.1746	0.0036	0.68819	1035	24	1037	20	1010	53	1010	53	2.67327	Rim
W1_95	299	2.278	2.156	0.031	0.1965	0.0024	0.62338	1167	10	1156	13	1185	24	1185	24	2.44726	Core
W1_96	63.2	1.605	2.907	0.063	0.2335	0.0036	0.3726	1380	17	1352	19	1411	43	1411	43	4.18143
W1_97	124.8	1.388	0.632	0.026	0.0801	0.0016	0.077999	495	16	496.4	9.4	470	96	496.4	9.4	0.282828
W1_98	29.13	2.11	1.813	0.084	0.1766	0.0048	0.20768	1045	29	1047	26	1000	100	1000	100	4.7
W1_99	176	1.556	10.17	0.16	0.4465	0.0071	0.58843	2451	15	2381	31	2506	25	2506	25	4.98803
W1_100	195.9	4.631	2.084	0.035	0.1937	0.0024	0.45846	1141	12	1141	13	1141	32	1141	32	0
W1_101	184.3	1.565	1.802	0.032	0.1767	0.0023	0.43038	1044	11	1049	13	1027	34	1027	34	2.14216
W1_102	95.1	1.741	1.688	0.047	0.1602	0.0031	0.60497	998	18	957	17	1093	45	1093	45	12.4428
W1_103	817	5.52	0.5254	0.009	0.06852	0.00081	0.53318	428	5.9	427.2	4.9	428	32	427.2	4.9	0.186916
W1_104	485	2.309	5.66	0.2	0.323	0.011	0.8704	1919	31	1802	55	2052	33	2052	33	12.1832
W1_105	471	2.244	2.258	0.032	0.2041	0.0027	0.61492	1197.5	9.8	1197	14	1194	24	1194	24	0.251256
W1_106	369.6	1.436	1.631	0.021	0.1626	0.0016	0.42813	981	8.2	970.8	9.1	998	26	998	26	2.72545
W1_107	152.8	1.178	0.631	0.017	0.0793	0.0012	0.3145	496	11	492	7.1	492	61	492	7.1	0.806452
W1_108	229	1.067	0.674	0.024	0.0798	0.0025	0.31485	522	15	495	15	635	89	495	15	5.17241
W1_109	562	7	1.45	0.11	0.1418	0.0092	0.7875	898	47	852	52	1039	92	1039	92	17.9981	Rim
W1_109	146	1.557	2.244	0.057	0.2026	0.0038	0.33542	1191	18	1188	21	1197	48	1197	48	0.75188	Core
W1_110	258	2.65	1.316	0.038	0.1337	0.003	0.59491	851	16	809	17	949	53	809	17	4.93537
W1_111	189	1.67	0.717	0.062	0.0883	0.006	0.65925	546	36	545	35	540	140	545	35	0.18315	Rim
W1_111	223	0.708	0.962	0.024	0.1101	0.0015	0.25663	684	13	673	8.8	700	56	673	8.8	1.60819	Core
W1_112	169.8	1.456	2.597	0.048	0.2228	0.0034	0.61098	1296	14	1298	17	1297	31	1297	31	0.077101
W1_113	248	8.79	0.791	0.015	0.0952	0.0012	0.33362	591.4	8.4	585.9	6.8	601	41	585.9	6.8	0.929997
W1_114	109	0.854	0.874	0.025	0.1034	0.0016	0.25298	634	14	634	9.1	606	61	634	9.1	0
W1_115	32.7	1.817	0.861	0.041	0.0982	0.0021	0.064622	622	22	604	13	650	110	604	13	2.89389
W1_116	340	2.341	1.293	0.037	0.1361	0.0036	0.52046	840	16	821	20	865	56	821	20	2.2619
W1_117	413	22.8	4.115	0.063	0.2904	0.0044	0.66265	1658	13	1645	22	1659	23	1659	23	0.843882
W1_118	88.5	1.911	1.564	0.041	0.1597	0.0023	0.35428	951	16	955	13	935	51	935	51	2.13904
W1_119	236	1.7	2.43	0.038	0.2148	0.0028	0.50516	1249	11	1253	15	1229	29	1229	29	1.95281
W1_120	160.8	1.236	4.95	0.15	0.3157	0.0045	0.29696	1805	24	1768	22	1828	46	1828	46	3.28228
W1_121	160.2	1.575	13.55	0.16	0.5238	0.0055	0.65141	2716	11	2714	23	2713	15	2713	15	0.0368596
W1_122	981	1.83	0.894	0.039	0.1013	0.0038	0.74721	648	21	622	22	728	65	622	22	4.01235	Rim
W1_122	546	1.92	1.17	0.018	0.1293	0.0017	0.49587	785.2	8.6	783.7	9.7	782	31	783.7	9.7	0.191034	Core
W1_123	198	1.367	0.833	0.02	0.0965	0.0012	0.37844	614	11	593.6	7.2	662	50	593.6	7.2	3.32248
W1_124	391	2.857	4.838	0.067	0.3214	0.0045	0.74352	1790	12	1795	22	1777	22	1777	22	1.01294
W1_125	416	7.34	0.906	0.073	0.105	0.0075	0.63075	653	39	643	43	670	150	643	43	1.53139	Rim
W1_125	296	1.02	1.778	0.036	0.1736	0.0021	0.48174	1035	13	1032	12	1028	36	1028	36	0.389105	Core
W1_126	136	0.81	2.746	0.053	0.2353	0.0037	0.47377	1339	14	1361	19	1294	37	1294	37	5.17774
W1_127	136	1.55	4.57	0.11	0.3066	0.0054	0.53259	1748	23	1723	27	1778	40	1778	40	3.09336	Rim
W1_127	68.7	1.027	5.87	0.16	0.3503	0.0076	0.52332	1952	24	1934	36	1962	46	1962	46	1.42712	Core
W1_128	393	1.749	1.02	0.041	0.1068	0.0039	0.61279	712	21	654	23	893	71	654	23	8.14607	Rim
W1_128	244.8	1.334	1.59	0.043	0.1577	0.0027	0.58462	964	17	944	15	1003	44	1003	44	5.88235	Core
W1_129	36.49	1.558	1.774	0.065	0.1777	0.0044	0.40064	1028	24	1053	24	963	75	963	75	9.34579
W1_130	52.8	1.277	1.668	0.05	0.1634	0.0034	0.077997	989	19	977	19	986	71	986	71	0.912779
W1_131	105	1.25	2.485	0.069	0.2061	0.0048	0.46345	1266	20	1207	26	1351	53	1351	53	10.6588
W1_132	47.3	0.575	9.68	0.16	0.4329	0.0058	0.50484	2400	15	2317	26	2470	26	2470	26	6.19433
W1_133	264	3.27	1.837	0.032	0.1747	0.0028	0.68949	1058	11	1037	15	1091	26	1091	26	4.94959
W1_134	390	1.71	6.98	0.14	0.3855	0.0085	0.7065	2103	17	2103	40	2107	28	2107	28	0.189843
W1_135	126	1.18	1.765	0.039	0.1739	0.0028	0.44621	1030	15	1035	16	1008	43	1008	43	2.67857
W1_136	888	6.34	0.923	0.018	0.1047	0.0016	0.57521	665	10	641.9	9.2	736	36	641.9	9.2	3.47368	Rim
W1_136	177.2	1.355	1.041	0.033	0.1199	0.0027	0.34746	731	17	730	16	701	75	730	16	0.136799	Core
W1_137	702	2.69	0.578	0.01	0.0743	0.0011	0.60967	464.3	7	461.8	6.6	466	36	461.8	6.6	0.538445
W1_138	66.3	0.812	0.938	0.041	0.1039	0.0021	0.1467	663	21	638	13	707	92	638	13	3.77074
W1_139	178	1.305	5.151	0.08	0.3254	0.0039	0.54512	1842	13	1815	19	1870	25	1870	25	2.94118
W1_140	212	3.47	1.749	0.033	0.1741	0.0021	0.4305	1026	12	1034	12	1004	35	1004	35	2.98805
Sample: W2				Isotopic ratios								Isotopic ages (Ma)
Grain #	[U] ppm	U/Th	207/235	2σ error	206/238	2σ error	RHO	207/235	2σ error	206/238	2σ error	207/206	2σ error	Best age	2σ error	% Discordance*	Rim/Core
W2_1	144.7	1.268	0.442	0.012	0.05845	0.00075	0.338	370	8.7	366.1	4.6	384	58	366.1	4.6	1.05405
W2_2	399	7.17	0.692	0.013	0.0857	0.0014	0.49418	533.4	7.6	529.9	8.3	545	40	529.9	8.3	0.656168
W2_3	68.3	1.154	0.874	0.025	0.1025	0.0021	0.26962	634	14	628	12	647	67	628	12	0.946372
W2_4	66.3	1.837	1.699	0.032	0.1638	0.0017	0.23667	1007	12	977.7	9.3	1066	38	1066	38	8.2833
W2_5	235	3.37	4.425	0.08	0.301	0.0057	0.64873	1715	15	1694	28	1740	28	1740	28	2.64368
W2_6	57.5	1.189	3.5	0.069	0.2694	0.0046	0.39667	1523	16	1536	23	1511	41	1511	41	1.65453
W2_7	192	3.74	1.693	0.053	0.1701	0.0043	0.66609	1004	20	1012	24	988	47	988	47	2.42915	Rim
W2_7	48.4	2.137	2.62	0.17	0.23	0.009	0.60904	1300	49	1334	47	1240	110	1240	110	7.58065	Core
W2_8	313	2.58	0.518	0.021	0.0645	0.0018	0.5653	423	14	403	11	522	77	403	11	4.72813
W2_9	95.4	1.548	3.054	0.045	0.2434	0.0028	0.41082	1419	11	1404	14	1442	30	1442	30	2.63523
W2_10	138.1	1.631	1.686	0.024	0.1661	0.0016	0.46304	1003.9	9.2	990.3	9	1029	28	1029	28	3.76093
W2_11	114.6	0.821	1.847	0.054	0.1795	0.0053	0.58824	1060	20	1063	29	1035	53	1035	53	2.70531
W2_12	204	6.1	1.361	0.053	0.142	0.0051	0.6363	874	21	855	29	905	68	905	68	5.52486
W2_13	56	2.198	0.713	0.029	0.0878	0.0028	0.32548	543	18	542	17	549	89	542	17	0.184162
W2_14	240.9	1.847	3.184	0.031	0.2512	0.002	0.57129	1452.3	7.4	1446	10	1468	16	1468	16	1.49864
W2_15	89.3	1.374	2.25	0.041	0.2047	0.0025	0.50947	1194	13	1200	14	1181	31	1181	31	1.60881
W2_16	62.3	3.16	0.826	0.032	0.0976	0.0028	0.32225	607	18	599	16	622	83	599	16	1.31796
W2_17	9.2	0.635	1.791	0.086	0.1798	0.0039	0.10076	1039	34	1064	21	960	110	960	110	10.8333
W2_18	49.8	1.638	1.79	0.033	0.1665	0.0018	0.2565	1041	12	992.6	9.8	1147	37	1147	37	13.4612
W2_19	128.3	1.055	1.733	0.025	0.1699	0.0015	0.2599	1019.2	9	1011.3	8.1	1036	28	1036	28	2.38417
W2_20	133	4.02	1.727	0.028	0.1716	0.0022	0.46606	1017	10	1020	12	1024	31	1024	31	0.390625
W2_21	78.9	0.766	0.739	0.027	0.0901	0.0023	0.18604	560	16	556	14	566	87	556	14	0.714286
W2_22	82.3	1.022	1.699	0.037	0.1667	0.0022	0.32044	1007	14	994	12	1025	44	1025	44	3.02439
W2_23	122	1.103	0.816	0.029	0.0832	0.0015	0.54012	602	16	515.3	9	956	58	515.3	9	14.402
W2_24	799	11.83	0.8166	0.0084	0.09687	0.00075	0.4757	605.7	4.7	596	4.4	643	20	596	4.4	1.60145
W2_25	1141	2.78	1.137	0.015	0.11	0.0011	0.74135	770.2	7.2	672.5	6.6	1064	18	672.5	6.6	12.685
W2_26	107.9	0.881	0.768	0.021	0.0927	0.0017	0.30826	577	13	571	10	590	63	571	10	1.03986
W2_27	156.2	1.648	2.678	0.056	0.2253	0.0041	0.37678	1322	15	1309	21	1346	40	1346	40	2.74889
W2_28	159.9	2.15	0.728	0.012	0.09041	0.00087	0.23247	555.5	7.4	557.9	5.2	538	40	557.9	5.2	0.432043
W2_29	175.5	1.98	12.85	0.15	0.4805	0.0053	0.77162	2667	12	2528	23	2789	14	2789	14	9.35819
W2_30	131	2.828	2.161	0.029	0.1968	0.0018	0.36487	1166.8	9.4	1157.9	9.9	1180	27	1180	27	1.87288
W2_31	87.3	2.901	1.661	0.057	0.1657	0.0049	0.34935	991	22	988	27	1000	75	1000	75	1.2
W2_32	46.9	1.71	2.561	0.099	0.2199	0.0058	0.56823	1276	29	1279	31	1294	61	1294	61	1.1592
W2_33	763	36.5	0.714	0.02	0.0911	0.003	0.26433	547	12	562	18	487	82	562	18	2.74223	Rim
W2_33	539	56	1.281	0.032	0.1352	0.0022	0.66956	836	14	817	13	883	39	817	13	2.27273	Core
W2_34	148.8	2.211	2.234	0.067	0.2037	0.006	0.58563	1186	20	1192	32	1186	53	1186	53	0.505902
W2_35	103.5	1.722	3.474	0.06	0.259	0.0032	0.41264	1519	14	1484	17	1570	33	1570	33	5.47771
W2_36	139.9	2.152	1.956	0.059	0.1832	0.0059	0.54247	1093	20	1081	32	1139	54	1139	54	5.09219
W2_37	96.4	0.49	0.813	0.018	0.0994	0.0014	0.20166	602.1	9.9	610.8	8.2	573	50	610.8	8.2	1.44494
W2_38	124	3.827	1.811	0.044	0.1758	0.0033	0.40966	1046	16	1044	18	1056	49	1056	49	1.13636
W2_39	13.88	0.4819	1.584	0.08	0.1598	0.0039	0.18734	954	32	955	21	930	110	930	110	2.68817
W2_40	280	83.5	5.35	0.11	0.3417	0.0059	0.67564	1878	17	1894	29	1853	31	1853	31	2.21263	Rim
W2_40	119.1	2.3	14.25	0.35	0.556	0.013	0.43323	2765	23	2848	52	2709	41	2709	41	5.13104	Core
W2_41	462	6.3	1.509	0.073	0.1523	0.0077	0.64091	928	29	912	43	979	77	979	77	6.84372
W2_42	204.5	21.7	5.83	0.17	0.3429	0.0099	0.58177	1947	27	1895	47	2011	46	2011	46	5.76827
W2_43	106.2	2.446	1.765	0.039	0.1712	0.0025	0.42197	1031	14	1018	14	1057	41	1057	41	3.68969
W2_44	98.6	0.984	0.736	0.023	0.0871	0.0013	0.30237	557	13	538.2	7.6	621	61	538.2	7.6	3.37522
W2_45	80.2	0.6674	1.833	0.045	0.1768	0.0024	0.34235	1055	16	1049	13	1064	48	1064	48	1.40977
W2_46	375	5.4	4.064	0.031	0.2884	0.0017	0.5154	1646.4	6.1	1633.2	8.7	1663	13	1663	13	1.79194
W2_47	1544	9.37	0.571	0.016	0.0688	0.0014	0.7579	458	10	428.8	8.5	593	39	428.8	8.5	6.37555	Rim
W2_47	752	8.03	0.63	0.011	0.0772	0.0011	0.50945	496.7	6.8	479.2	6.3	571	30	479.2	6.3	3.52325	Core
W2_48	336.1	1.333	0.801	0.017	0.0944	0.0013	0.27916	596.8	9.4	581.6	7.7	651	46	581.6	7.7	2.54692
W2_49	233.3	1.488	0.754	0.032	0.0931	0.0016	0.36823	570	18	574.1	9.4	551	88	574.1	9.4	0.719298
W2_50	143.6	3.287	1.771	0.048	0.1718	0.0027	0.29258	1032	18	1022	15	1060	55	1060	55	3.58491
W2_51	11.13	0.443	2.19	0.12	0.1803	0.0044	0.27802	1164	38	1067	24	1320	110	1320	110	19.1667
W2_52	50.4	2.339	4.697	0.07	0.3111	0.0031	0.25668	1764	12	1745	15	1786	29	1786	29	2.29563
W2_53	192	11.6	0.741	0.023	0.0901	0.0013	0.30581	561	13	556.3	7.6	567	62	556.3	7.6	0.83779	Rim
W2_53	62.3	7.1	1.19	0.098	0.1303	0.0057	0.23867	791	47	789	33	780	180	789	33	0.252845	Core
W2_54	289.4	1.325	1.562	0.035	0.1542	0.0032	0.61328	954	13	923	18	1023	39	1023	39	9.77517
W2_55	428	2.86	0.6674	0.0091	0.08283	0.00081	0.48642	518.6	5.5	512.9	4.8	538	29	512.9	4.8	1.09911
W2_56	236.7	1.93	2.196	0.08	0.1992	0.007	0.53424	1174	26	1169	38	1175	75	1175	75	0.510638	Rim
W2_56	68.8	1.272	4.38	0.15	0.303	0.011	0.61481	1705	28	1702	53	1717	56	1717	56	0.873617	Core
W2_57	273.7	5.14	1.51	0.031	0.1574	0.003	0.42591	932	12	942	17	917	41	917	41	2.72628	Rim
W2_57	244.9	1.8	1.849	0.057	0.1756	0.0033	0.6393	1060	20	1042	18	1098	48	1098	48	5.10018	Core
W2_58	401	44	0.896	0.055	0.1065	0.0071	0.7477	648	29	652	41	640	110	652	41	0.617284	Rim
W2_58	98.8	1.13	10.94	0.24	0.481	0.011	0.68459	2512	21	2527	50	2516	32	2516	32	0.437202	Core
W2_59	90.2	0.82	4.567	0.092	0.3098	0.0053	0.57728	1740	17	1738	26	1747	32	1747	32	0.515169
W2_60	247.4	1.51	5.85	0.12	0.3392	0.0062	0.44838	1950	18	1881	30	2023	32	2023	32	7.01928
W2_61	177.3	1.087	5.67	0.15	0.337	0.011	0.62879	1918	24	1865	55	2010	48	2010	48	7.21393
W2_62	150.2	1.87	1.657	0.029	0.165	0.0021	0.35486	990	11	984	11	1003	36	1003	36	1.89432
W2_63	219	2.37	0.581	0.014	0.07577	0.00096	0.3278	463.9	8.8	470.7	5.8	431	50	470.7	5.8	1.46583
W2_64	141.1	3.501	1.635	0.05	0.164	0.0048	0.51514	981	19	978	27	993	60	993	60	1.51057
W2_65	279	2.109	0.592	0.023	0.0756	0.0031	0.5285	469	14	469	18	461	84	469	18	0
W2_66	228	2.19	0.876	0.025	0.1025	0.0027	0.41421	636	13	630	15	670	61	630	15	0.943396
W2_67	490	125	0.642	0.058	0.0755	0.0058	0.54433	500	35	468	34	640	160	468	34	6.4	Rim
W2_67	151.2	1.852	3.1	0.1	0.236	0.0062	0.56165	1430	25	1365	32	1505	50	1505	50	9.30233	Core
W2_68	94.6	2.61	2.34	0.13	0.21	0.012	0.58296	1218	41	1221	62	1215	99	1215	99	0.493827
W2_69	37.2	3.27	2.058	0.077	0.1861	0.0053	0.44858	1134	25	1102	30	1188	73	1188	73	7.23906
W2_70	60	1.516	13.93	0.33	0.531	0.013	0.64649	2738	23	2738	55	2747	34	2747	34	0.32763
W2_71	232.4	2.512	3.738	0.054	0.2681	0.0037	0.5882	1577	11	1530	19	1645	24	1645	24	6.99088
W2_72	103.7	0.93	4.006	0.05	0.2827	0.0023	0.33888	1636	11	1604	12	1681	24	1681	24	4.58061
W2_73	260	1.62	12.23	0.34	0.493	0.016	0.73468	2621	26	2583	70	2654	37	2654	37	2.67521
W2_74	56.7	1.139	0.672	0.026	0.0834	0.0014	0.12735	517	16	515.9	8.3	524	87	515.9	8.3	0.212766
W2_75	225.4	8.54	1.157	0.034	0.1262	0.0026	0.1258	780	16	766	15	817	71	766	15	1.79487
W2_76	112.4	1.57	2.155	0.042	0.1986	0.0028	0.48808	1163	13	1167	15	1161	35	1161	35	0.516796
W2_77	260.2	2.588	1.514	0.026	0.1534	0.002	0.50678	935	10	920	11	974	30	974	30	5.54415
W2_78	3.38	0.2834	0.624	0.08	0.0807	0.004	0.058133	464	53	499	24	270	230	499	24	7.5431
W2_79	201.7	0.932	0.839	0.02	0.0999	0.0022	0.45519	616	11	613	13	627	52	613	13	0.487013
W2_80	305	5.02	4.495	0.094	0.3026	0.0075	0.54267	1731	18	1702	37	1760	43	1760	43	3.29545
W2_81	147.7	3.48	0.837	0.021	0.1008	0.0018	0.27296	615	12	619	10	601	59	619	10	0.650407
W2_82	137	17.9	0.654	0.024	0.0814	0.0022	0.50425	508	14	504	13	536	67	504	13	0.787402
W2_83	383	12.6	1.863	0.094	0.1831	0.0081	0.78071	1063	35	1083	44	1029	64	1029	64	5.24781	Rim
W2_83	149.3	1.886	2.794	0.053	0.24	0.0038	0.59913	1352	14	1386	20	1301	31	1301	31	6.53344	Core
W2_84	366	1.71	7.21	0.25	0.368	0.012	0.68421	2127	31	2026	61	2241	47	2241	47	9.59393
W2_85	20.77	0.848	1.761	0.083	0.1733	0.0076	0.34927	1028	31	1027	41	1000	110	1000	110	2.7
W2_86	86.1	1.775	3.445	0.067	0.2618	0.0043	0.51979	1519	16	1501	21	1552	35	1552	35	3.28608
W2_87	196	1.542	0.856	0.017	0.1004	0.0011	0.25401	626.4	9.3	616.8	6.6	646	43	616.8	6.6	1.53257
W2_88	67.8	1.64	13.2	0.19	0.5081	0.0069	0.65113	2691	13	2650	29	2729	20	2729	20	2.89483
W2_89	29.23	1.083	0.444	0.029	0.0554	0.0017	0.12637	369	20	347	10	490	150	347	10	5.96206
W2_90	146.6	1.588	1.185	0.027	0.127	0.0019	0.37078	792	13	771	11	851	47	771	11	2.65152
W2_91	374	2.23	1.877	0.048	0.1669	0.0046	0.56017	1070	17	994	25	1225	51	1225	51	18.8571
W2_92	175.4	1.058	10.29	0.17	0.4599	0.0081	0.59215	2460	16	2438	35	2485	26	2485	26	1.89135
W2_93	118.1	1.515	1.84	0.059	0.1773	0.0053	0.51747	1056	21	1051	29	1073	62	1073	62	2.05033
W2_94	151.9	2.5	1.669	0.064	0.1651	0.0062	0.64276	986	24	982	34	994	61	994	61	1.20724
W2_95	125.6	1.425	1.466	0.027	0.149	0.0016	0.32258	914	11	895.2	9.2	975	37	975	37	8.18462
W2_96	111.1	1.534	1.997	0.041	0.1863	0.0032	0.53168	1112	14	1103	18	1127	37	1127	37	2.12955
W2_97	57	1.701	2.265	0.045	0.1977	0.0023	0.31904	1201	13	1163	12	1274	37	1274	37	8.71272
W2_98	24.2	1.246	1.633	0.072	0.1634	0.0038	0.23002	974	28	975	21	969	93	969	93	0.619195
W2_99	212.4	1.159	0.555	0.011	0.06992	0.00073	0.26024	447.4	7	435.6	4.4	493	43	435.6	4.4	2.63746
W2_100	22.09	18.8	1.614	0.07	0.1614	0.0041	0.30306	962	28	963	23	921	93	921	93	4.56026
W2_101	158.3	1.404	0.428	0.019	0.0543	0.0019	0.4217	361	13	340	12	480	88	340	12	5.81717
W2_102	353	0.79	0.723	0.017	0.0876	0.0017	0.46742	550.8	9.7	541.2	9.8	576	46	541.2	9.8	1.74292
W2_103	635	10.7	3.99	0.18	0.252	0.013	0.738	1624	37	1443	67	1860	66	1860	66	22.4194
W2_105	490	1.857	0.811	0.016	0.0942	0.0016	0.6336	601.9	9.1	579.8	9.5	673	35	579.8	9.5	3.67171
W2_106	90.8	1.445	1.847	0.049	0.1755	0.0027	0.30424	1058	17	1042	15	1086	51	1086	51	4.05157
W2_107	57.7	3.205	1.627	0.038	0.1629	0.0019	0.34424	977	15	973	11	985	46	985	46	1.21827
W2_108	101.5	2.504	1.703	0.033	0.1687	0.0023	0.40322	1007	13	1004	13	1010	39	1010	39	0.594059
W2_109	171.3	1.087	1.606	0.036	0.1593	0.0021	0.45881	971	14	953	12	1016	41	1016	41	6.20079
W2_110	273	1.37	0.695	0.013	0.07958	0.00096	0.20952	534.7	7.8	493.6	5.7	708	41	493.6	5.7	7.68655
W2_111	87.7	4.55	1.008	0.049	0.1195	0.0049	0.57786	704	24	727	28	631	86	727	28	3.26705	Rim
W2_111	105.6	1.89	1.36	0.037	0.1424	0.003	0.3863	869	16	858	17	897	57	897	57	4.34783	Core
W2_112	201	4.59	1.794	0.076	0.174	0.0058	0.64749	1039	28	1033	32	1054	64	1054	64	1.99241	Rim
W2_112	147.6	2.717	2.026	0.04	0.1886	0.0023	0.36854	1122	13	1114	13	1147	39	1147	39	2.87707	Core
W2_113	148.7	1.306	1.733	0.056	0.17	0.0051	0.56075	1019	21	1012	28	1057	67	1057	67	4.25733
W2_114	308.9	1.44	0.578	0.014	0.0746	0.0019	0.44629	462.7	9	463	11	462	55	463	11	0.0648368
W2_115	211	5.58	0.918	0.019	0.106	0.002	0.44359	660.5	9.8	649	12	699	46	649	12	1.74111
W2_116	44.1	1.369	3.891	0.085	0.2886	0.0043	0.3101	1608	18	1633	22	1576	43	1576	43	3.61675
W2_118	162.5	4.572	1.7	0.022	0.1679	0.0016	0.27804	1007	8.4	1000.4	9	1018	29	1018	29	1.72888
W2_119	62.6	1.251	0.805	0.032	0.094	0.0015	0.01828	599	17	578.8	8.7	647	93	578.8	8.7	3.37229
W2_120	126.5	1.212	0.707	0.016	0.088	0.0013	0.21601	541.1	9.7	543.8	7.6	523	55	543.8	7.6	0.498984
W2_121	162.8	2.726	3.557	0.095	0.2411	0.0047	0.55282	1538	21	1392	24	1754	42	1754	42	20.6385
W2_122	69.8	2.339	13.59	0.2	0.5219	0.0075	0.54516	2720	13	2709	32	2731	23	2731	23	0.805566
W2_123	202	1.411	0.614	0.023	0.0791	0.0029	0.34542	482	14	490	17	457	72	490	17	1.65975
W2_124	706	10.6	1.722	0.083	0.1675	0.009	0.76779	1015	31	998	49	1060	74	1060	74	5.84906	Rim
W2_124	74.8	0.851	3.248	0.075	0.2582	0.004	0.43271	1466	18	1480	21	1450	42	1450	42	2.06897	Core
W2_125	47.5	1.116	12	0.34	0.474	0.011	0.59029	2602	27	2498	46	2690	41	2690	41	7.13755
W2_127	104.6	1.429	0.949	0.045	0.0979	0.0032	0.36301	668	23	601	19	893	98	601	19	10.0299
Sample: W3				Isotopic ratios								Isotopic ages (Ma)
Grain #	[U] ppm	U/Th	207/235	2σ error	206/238	2σ error	RHO	207/235	2σ error	206/238	2σ error	207/206	2σ error	Best age	2σ error	% Discordance*	Rim/Core
W3_1	154.4	1.245	1.262	0.026	0.1335	0.0017	0.54855	828	12	807.5	9.9	875	38	807.5	9.9	2.47585
W3_2	272	1.589	4.159	0.046	0.2957	0.0031	0.56303	1664.5	9	1669	15	1659	19	1659	19	0.602773
W3_3	989	9.24	1.819	0.035	0.1784	0.0029	0.59224	1051	13	1058	16	1033	33	1033	33	2.42014	Rim
W3_3	324.9	2.611	2.218	0.036	0.2034	0.0026	0.40461	1185	11	1193	14	1172	32	1172	32	1.79181	Core
W3_4	794	2.322	2.697	0.03	0.2284	0.0023	0.62413	1326.4	8.2	1325	12	1332	17	1332	17	0.525526
W3_5	40.9	0.2949	0.741	0.032	0.0901	0.0015	0.14071	557	19	555.9	8.6	520	93	555.9	8.6	0.197487
W3_6	258	3.89	3.311	0.046	0.2599	0.0031	0.50932	1482	11	1489	16	1473	23	1473	23	1.08622
W3_7	169.6	1.381	0.729	0.016	0.08735	0.00086	0.099133	555.6	9.7	539.8	5.1	602	51	539.8	5.1	2.84377
W3_8	120.7	1.168	2.071	0.036	0.1866	0.002	0.41506	1140	12	1103	11	1207	31	1207	31	8.6164
W3_9	230	2.601	2.111	0.027	0.1959	0.0014	0.4099	1151	8.8	1153.2	7.6	1148	23	1148	23	0.452962
W3_10	19.83	3.23	13.7	0.27	0.512	0.0076	0.50032	2723	19	2662	32	2763	28	2763	28	3.65545
W3_11	146	0.818	1.75	0.025	0.1691	0.0015	0.34531	1025.5	9.3	1008.1	8.2	1062	28	1062	28	5.07533
W3_12	105.6	0.952	5.288	0.088	0.3357	0.0039	0.47008	1865	15	1865	19	1864	25	1864	25	0.0536481
W3_13	114.8	1.078	0.711	0.017	0.0883	0.001	0.048342	543	10	545.4	6	527	56	545.4	6	0.441989
W3_14	364	1.86	7.278	0.091	0.3958	0.0048	0.54571	2145	11	2149	22	2141	21	2141	21	0.373657
W3_15	377	0.981	1.783	0.02	0.1745	0.0018	0.52733	1038	7.5	1037	10	1044	21	1044	21	0.670498
W3_16	89.2	2.081	1.798	0.037	0.1692	0.0018	0.161	1042	13	1007.7	9.6	1112	41	1112	41	9.3795
W3_17	102.5	0.974	2.092	0.035	0.1937	0.0021	0.29373	1144	12	1141	11	1150	33	1150	33	0.782609
W3_18	183	2.415	13.29	0.17	0.4944	0.0056	0.68893	2700	12	2588	24	2784	16	2784	16	7.04023
W3_19	296	5.94	0.963	0.019	0.1092	0.0014	0.46635	683.7	9.8	668	8.2	739	39	668	8.2	2.29633
W3_20	72.7	2.553	1.8	0.045	0.1758	0.0027	0.06086	1041	16	1043	15	1024	50	1024	50	1.85547
W3_21	183	0.967	11.06	0.15	0.453	0.0055	0.67316	2527	12	2410	25	2625	17	2625	17	8.19048
W3_22	71.1	1.088	4.844	0.079	0.3208	0.004	0.51563	1789	14	1792	20	1788	27	1788	27	0.223714
W3_23	118.5	1.896	0.663	0.017	0.0837	0.0012	0.14502	515	10	517.9	6.9	485	54	517.9	6.9	0.563107
W3_24	204.3	1.69	4.077	0.066	0.291	0.0046	0.73066	1647	13	1645	23	1652	26	1652	26	0.423729
W3_25	268	9.34	0.736	0.04	0.0922	0.003	0.35732	559	24	568	18	500	160	568	18	1.61002	Rim
W3_25	148.1	1.269	4.905	0.066	0.3113	0.0032	0.53555	1801	11	1747	16	1874	22	1874	22	6.77695	Core
W3_26	0.48	-0.16	169	60	1.51	0.52	0.91823	5000	370	5500	1200	4980	220	4980	220	10.4418
W3_27	348	3.93	1.767	0.044	0.1745	0.0032	0.36219	1032	16	1037	17	1024	52	1024	52	1.26953	Rim
W3_27	158	1.89	2.105	0.041	0.1945	0.0034	0.53664	1149	13	1145	18	1166	38	1166	38	1.80103	Core
W3_28	1216	8	6.284	0.061	0.3609	0.0037	0.65645	2014.9	8.5	1986	17	2046	15	2046	15	2.93255
W3_29	122.1	1.614	0.9	0.022	0.1064	0.0014	0.23906	649	12	652.8	8.5	622	53	652.8	8.5	0.585516
W3_30	140	2.68	0.931	0.02	0.1093	0.0015	0.29503	666	10	668.2	9	655	48	668.2	9	0.33033
W3_31	548	2.313	0.944	0.014	0.1117	0.0013	0.53184	673.8	7.5	682.6	7.6	642	29	682.6	7.6	1.30603
W3_32	113	7	1.838	0.083	0.1774	0.0056	0.45301	1052	29	1051	31	1050	88	1050	88	0.0952381
W3_33	67.4	1.93	1.736	0.049	0.1697	0.0028	0.42469	1016	18	1010	16	1038	49	1038	49	2.6975
W3_34	223	2.076	3.216	0.09	0.2591	0.0063	0.41359	1459	22	1484	32	1433	49	1433	49	3.55897
W3_35	83.1	0.658	1.651	0.034	0.1662	0.0018	0.14448	989	14	991	10	991	47	991	47	0
W3_36	530	18.32	0.742	0.012	0.0907	0.0012	0.57156	562.7	7	559.8	7.2	577	30	559.8	7.2	0.515372
W3_37	194	1.647	1.719	0.026	0.1708	0.0018	0.46072	1013.8	9.6	1016.5	9.7	999	29	999	29	1.75175
W3_38	120.1	2.396	1.528	0.026	0.1567	0.0014	0.12747	939	11	938.5	7.9	939	37	939	37	0.0532481
W3_39	114.7	1.148	2.251	0.041	0.2035	0.0021	0.37819	1194	13	1193	11	1198	32	1198	32	0.417362
W3_40	28.6	0.842	2.191	0.087	0.1814	0.0032	0.072728	1165	26	1074	18	1310	77	1310	77	18.0153
W3_41	134.8	2.014	0.94	0.029	0.106	0.002	0.26187	669	15	649	12	719	60	649	12	2.98954
W3_42	303	2.838	4.506	0.047	0.3086	0.0025	0.52613	1730.6	8.6	1733	12	1729	16	1729	16	0.231348
W3_43	306	1.361	0.502	0.011	0.06532	0.00069	0.40848	413.8	7.1	407.8	4.2	429	44	407.8	4.2	1.44998
W3_44	135.2	1.335	1.679	0.043	0.1661	0.0036	0.53962	998	16	990	20	1024	41	1024	41	3.32031
W3_45	355	1.516	1.723	0.024	0.172	0.0021	0.55256	1015.7	9	1023	11	1005	25	1005	25	1.79104
W3_46	96	0.775	5.63	0.081	0.3362	0.0051	0.64552	1919	12	1866	24	1983	21	1983	21	5.90015
W3_47	204.5	1.065	5.523	0.088	0.3452	0.0045	0.566	1901	14	1910	22	1898	25	1898	25	0.632244
W3_48	112	3.02	0.826	0.023	0.0969	0.0012	0.025517	609	13	595.9	6.8	643	63	595.9	6.8	2.15107
W3_49	97.9	1.301	4.595	0.077	0.3143	0.0049	0.52524	1747	14	1760	24	1730	30	1730	30	1.7341
W3_50	50	2.48	0.819	0.032	0.0984	0.0019	0.26098	601	18	605	11	573	83	605	11	0.665557
W3_51	92.3	0.987	0.409	0.028	0.0537	0.0021	0.35432	345	20	337	13	360	130	337	13	2.31884
W3_52	75.8	1.094	6.934	0.096	0.3824	0.0042	0.49658	2100	12	2087	20	2112	22	2112	22	1.18371
W3_53	364	2.504	0.742	0.014	0.0928	0.0012	0.30125	562.6	8.1	572.1	6.9	512	43	572.1	6.9	1.68859
W3_54	396	0.944	0.692	0.018	0.08514	0.00097	0.41018	532	10	526.6	5.7	548	50	526.6	5.7	1.01504
W3_55	57.6	1.63	0.692	0.039	0.0843	0.0023	0.086271	535	22	521	14	540	130	521	14	2.61682
W3_56	665	4.08	0.738	0.013	0.0897	0.0016	0.54496	560.1	7.8	553.4	9.3	588	38	553.4	9.3	1.19621
W3_57	98.5	1.323	2.446	0.042	0.2176	0.0023	0.39766	1255	12	1269	12	1224	32	1224	32	3.67647
W3_58	148.9	1.435	0.796	0.019	0.0963	0.0014	0.51226	592	11	592.6	8.1	578	49	592.6	8.1	0.101351
W3_59	262.7	3.682	1.663	0.025	0.1647	0.0018	0.43893	994	9.3	982.5	9.7	1016	28	1016	28	3.29724
W3_60	26.79	1.138	15.61	0.3	0.5293	0.0093	0.47029	2849	19	2736	39	2939	32	2939	32	6.90711
W3_61	733	24.73	0.7999	0.0095	0.09592	0.00065	0.40451	596.2	5.4	590.4	3.8	608	24	590.4	3.8	0.972828
W3_62	156.6	2.097	6.588	0.098	0.3778	0.0053	0.554	2055	13	2065	24	2046	24	2046	24	0.928641
W3_63	40.2	0.49	2.224	0.073	0.2059	0.0029	0.17995	1182	22	1206	15	1128	68	1128	68	6.91489
W3_64	141.1	1.082	12	0.14	0.4784	0.0054	0.58487	2602	11	2522	24	2667	17	2667	17	5.43682
W3_65	525	13.2	0.961	0.047	0.111	0.0044	0.52836	682	25	678	26	684	92	678	26	0.58651	Rim
W3_65	154.2	1.081	1.509	0.04	0.1576	0.0024	0.27357	931	16	943	13	898	55	898	55	5.01114	Core
W3_66	29.79	0.75	1.557	0.057	0.1578	0.0027	0.27349	947	23	944	15	945	76	945	76	0.10582
W3_67	162	2.132	1.904	0.034	0.1814	0.0024	0.46938	1082	12	1074	13	1092	34	1092	34	1.64835
W3_68	165.7	1.457	3.012	0.096	0.2382	0.0033	0.30956	1406	22	1377	17	1436	48	1436	48	4.10864
W3_69	632	4.97	2.914	0.084	0.2426	0.0083	0.70355	1384	22	1399	43	1358	54	1358	54	3.01915	Rim
W3_69	136	1.059	4.113	0.073	0.2928	0.0045	0.51179	1654	14	1654	23	1662	31	1662	31	0.481348	Core
W3_70	176.2	1.541	2.68	0.037	0.2259	0.0022	0.26454	1321	10	1313	12	1334	28	1334	28	1.57421
W3_71	396	2.608	16.61	0.15	0.5604	0.0055	0.70498	2912.3	8.6	2867	23	2943	12	2943	12	2.5824
W3_72	183	1.471	1.758	0.031	0.1729	0.0022	0.45948	1028	11	1027	12	1031	32	1031	32	0.387973
W3_73	486	1.42	0.788	0.023	0.095	0.0026	0.5349	589	13	585	15	598	58	585	15	0.679117
W3_74	169.4	1.092	7.5	0.11	0.4015	0.0061	0.66798	2171	13	2175	28	2171	21	2171	21	0.184247
W3_75	49.2	0.933	1.976	0.063	0.1912	0.0029	0.32511	1101	22	1127	16	1045	65	1045	65	7.84689
W3_76	319	2.658	1.697	0.023	0.1671	0.0015	0.43548	1006.9	8.6	995.8	8.1	1022	25	1022	25	2.5636
W3_77	180.1	2.12	5.492	0.059	0.3432	0.0036	0.59625	1897.8	9.2	1901	17	1895	20	1895	20	0.316623
W3_78	550	2.83	0.6396	0.0086	0.08085	0.00082	0.30972	501.5	5.3	501.1	4.9	499	31	501.1	4.9	0.0797607
W3_79	190.3	2.561	2.55	0.03	0.2156	0.0021	0.32168	1285	8.4	1258	11	1330	24	1330	24	5.41353
W3_80	76.8	0.908	0.857	0.026	0.0997	0.0013	0.16965	625	14	612.5	7.5	643	64	612.5	7.5	2
W3_81	42.2	1.856	12.61	0.21	0.513	0.0081	0.72945	2648	16	2666	34	2634	21	2634	21	1.21488
W3_82	63	0.684	5.277	0.086	0.3325	0.0035	0.34663	1862	14	1849	17	1872	29	1872	29	1.22863
W3_83	285	0.93	3.783	0.04	0.2831	0.0026	0.51762	1587.9	8.5	1607	13	1566	19	1566	19	2.61814
W3_84	124	1.57	4.748	0.08	0.3183	0.0043	0.56933	1774	15	1780	21	1763	27	1763	27	0.964265
W3_85	391	1.54	0.747	0.013	0.0912	0.001	0.51948	565.3	7.4	562.7	5.9	573	31	562.7	5.9	0.459933
W3_86	279	1.579	1.499	0.027	0.1548	0.0017	0.44787	928	11	927.8	9.7	934	33	934	33	0.663812
W3_87	110.4	0.793	5.184	0.074	0.3268	0.0043	0.4552	1849	13	1822	21	1882	26	1882	26	3.1881
W3_88	167	0.498	4.911	0.072	0.3217	0.0037	0.38389	1802	13	1797	18	1799	27	1799	27	0.111173
W3_89	35.2	1.086	6.5	0.12	0.3711	0.0058	0.28017	2043	17	2032	27	2050	38	2050	38	0.878049
W3_90	119.2	2.507	2.81	0.042	0.2295	0.0024	0.35722	1356	11	1331	13	1391	29	1391	29	4.31344
W3_91	319.9	2.057	0.406	0.0077	0.05536	0.00051	0.16109	345.4	5.6	347.3	3.1	320	43	347.3	3.1	0.550087
W3_92	274.1	1.896	0.75	0.015	0.0948	0.0014	0.42371	567	8.5	583.7	8.3	494	42	583.7	8.3	2.94533
W3_93	195.4	2.564	1.026	0.024	0.1129	0.0019	0.25375	716	12	689	11	812	53	689	11	3.77095	Rim
W3_93	96.6	1.698	1.346	0.047	0.1393	0.0035	0.53207	863	20	840	20	918	59	840	20	2.66512	Core
W3_94	363.4	0.847	0.724	0.011	0.08908	0.00074	0.23032	552	6.7	550.1	4.4	557	34	550.1	4.4	0.344203
W3_95	270	1.57	0.698	0.019	0.0852	0.0013	0.31427	536	11	526.8	8	562	58	526.8	8	1.71642
W3_96	85.7	1.69	1.141	0.03	0.1254	0.0017	0.30984	769	14	761.4	9.6	773	53	761.4	9.6	0.988296
W3_97	430	3.403	0.755	0.012	0.09254	0.00087	0.36653	570.2	7.1	570.5	5.1	562	35	570.5	5.1	0.0526131
W3_98	113.3	2.93	0.738	0.056	0.0918	0.0037	0.41941	557	32	566	22	500	140	566	22	1.6158	Rim
W3_98	58.9	0.57	1.032	0.042	0.1156	0.0022	0.19309	717	20	705	13	729	85	705	13	1.67364	Core
W3_99	269	2.28	4.174	0.063	0.2964	0.0034	0.56305	1666	13	1673	17	1658	24	1658	24	0.904704
W3_100	9.8	0.35	2.33	0.14	0.2097	0.0057	0.29668	1202	42	1225	30	1120	120	1120	120	9.375
W3_101	117.7	1.805	1.239	0.028	0.1311	0.0015	0.16728	815	13	794	8.4	877	47	794	8.4	2.57669
W3_102	1109	38.8	1.936	0.021	0.1852	0.0019	0.56118	1094.2	7.5	1095	10	1092	20	1092	20	0.274725	Rim
W3_102	69.6	3.36	2.657	0.078	0.224	0.0055	0.31491	1313	22	1302	29	1332	62	1332	62	2.25225	Core
W3_103	151.2	3.07	9.39	0.13	0.4066	0.004	0.56136	2376	12	2198	18	2530	19	2530	19	13.1225
W3_104	106.4	1.064	0.706	0.021	0.0884	0.0011	0.16905	542	13	546.2	6.8	502	66	546.2	6.8	0.774908
W3_105	98.1	1.864	0.963	0.029	0.1112	0.0021	0.33797	681	15	679	12	671	65	679	12	0.293686
W3_106	331	0.7833	3.882	0.046	0.2822	0.0029	0.68271	1608.2	9.5	1602	14	1619	16	1619	16	1.05003
W3_107	385.8	5.66	0.908	0.017	0.1052	0.0013	0.4049	654.4	8.7	645.6	7.2	687	37	645.6	7.2	1.34474
W3_108	84.1	1.951	10.08	0.23	0.4663	0.0076	0.30692	2440	21	2466	33	2417	39	2417	39	2.02731
W3_109	181	2.8	3.214	0.064	0.2513	0.0034	0.70085	1456	15	1447	18	1479	26	1479	26	2.16362
W3_110	181.7	1.153	0.698	0.016	0.087	0.0011	0.28412	535.8	9.4	537.7	6.6	515	49	537.7	6.6	0.35461
W3_111	314	32.2	1.769	0.06	0.1752	0.004	0.44427	1033	22	1040	22	1008	63	1008	63	3.1746	Rim
W3_111	77.8	1.985	2.183	0.049	0.1958	0.0022	0.18495	1172	16	1152	12	1211	44	1211	44	4.87201	Core
W3_112	174	1.773	1.396	0.04	0.1391	0.0033	0.5718	884	17	839	19	998	51	839	19	5.0905
W3_114	224	2.293	2.036	0.038	0.1908	0.0026	0.53094	1125	13	1125	14	1122	33	1122	33	0.26738
W3_115	157	1.447	4.042	0.054	0.2855	0.0035	0.44009	1642	11	1618	17	1673	25	1673	25	3.28751
W3_116	456	14.24	1.529	0.027	0.1582	0.0017	0.38329	941	11	946.8	9.2	929	32	929	32	1.91604
W3_117	189	1.343	0.914	0.02	0.108	0.0014	0.21762	657	10	661.1	8	648	47	661.1	8	0.624049
W3_118	161.7	1.363	2.022	0.032	0.1903	0.0018	0.38087	1121	11	1123	9.6	1114	29	1114	29	0.807899
W3_119	86.7	0.956	4.51	0.083	0.3054	0.0041	0.37798	1730	15	1717	20	1750	33	1750	33	1.88571
W3_120	379	0.922	6.8	0.25	0.343	0.0063	0.65934	2083	33	1905	29	2241	36	2241	36	14.9933
W3_121	60	1.2	2.641	0.083	0.2113	0.0042	0.41468	1302	23	1234	22	1408	57	1408	57	12.358
W3_122	150.3	1.047	0.974	0.04	0.1141	0.0031	0.55064	692	20	696	18	647	81	696	18	0.578035	Rim
W3_122	232.4	1.562	1.378	0.033	0.1419	0.0025	0.54645	878	14	855	14	934	43	934	43	8.45824	Core
W3_123	255.9	1.887	1.668	0.073	0.1671	0.0044	0.060781	995	28	996	24	978	85	978	85	1.84049
W3_124	462	6.61	3.57	0.039	0.2647	0.0025	0.61118	1542.6	8.5	1513	13	1586	18	1586	18	4.60277
W3_125	465	7.27	0.815	0.012	0.09748	0.00094	0.39525	604.2	6.6	599.5	5.5	616	30	599.5	5.5	0.777888
W3_126	116.2	1.135	0.581	0.019	0.07391	0.00099	0.094765	463	12	459.6	5.9	457	71	459.6	5.9	0.734341
W3_127	107	3.56	1.099	0.049	0.1215	0.0038	0.25227	752	24	739	22	820	130	739	22	1.72872	Rim
W3_127	130.8	0.5205	1.599	0.035	0.1623	0.0021	0.27152	968	14	969	12	978	45	978	45	0.920245	Core
W3_128	112.2	3.84	0.609	0.032	0.0753	0.0013	0.14158	480	20	468.1	7.9	500	110	468.1	7.9	2.47917	Rim
W3_128	239	4.3	2.216	0.078	0.2025	0.0058	0.72564	1183	25	1188	31	1187	43	1187	43	0.084246	Core
W3_129	345	15.3	0.822	0.033	0.1015	0.0021	0.29867	607	18	623	12	553	91	623	12	2.63591	Rim
W3_129	10.12	0.817	1.62	0.13	0.162	0.0046	0.28536	976	55	967	26	960	170	960	170	0.729167	Core
W3_130	90.8	2.063	12.68	0.28	0.498	0.0092	0.76636	2653	20	2603	39	2693	30	2693	30	3.342
W3_131	122.3	2.144	1.747	0.033	0.1724	0.0021	0.2889	1023	12	1025	12	1014	40	1014	40	1.08481
W3_132	144	1.922	1	0.026	0.1092	0.0013	0.27088	701	13	667.8	7.3	806	53	667.8	7.3	4.73609
W3_133	63.2	1.831	0.671	0.024	0.0842	0.0013	0.11794	519	15	521	7.9	483	80	521	7.9	0.385356
W3_134	577	1.472	0.785	0.021	0.0953	0.0015	0.61431	587	12	586.5	8.8	579	48	586.5	8.8	0.0851789	Rim
W3_134	201.5	1.119	1.136	0.035	0.1275	0.0024	0.33135	769	17	774	14	752	65	774	14	0.650195	Core
W3_135	237	75	0.589	0.028	0.0711	0.0022	0.048021	470	18	443	13	600	130	443	13	5.74468	Rim
W3_135	167	1.414	1.28	0.032	0.1401	0.002	0.34143	833	14	845	11	791	53	845	11	1.44058	Core
W3_136	24.1	1.507	0.781	0.043	0.0914	0.0022	0.30956	578	25	563	13	610	110	563	13	2.59516
W3_137	930	38.8	0.821	0.018	0.0988	0.0023	0.37693	608	10	607	13	603	55	607	13	0.164474	Rim
W3_137	239	1.398	13.99	0.28	0.4851	0.0088	0.84737	2746	19	2548	38	2891	18	2891	18	11.8644	Core
W3_138	271	2.64	6.33	0.084	0.3642	0.0052	0.65837	2023	12	2001	25	2048	21	2048	21	2.29492
W3_139	179.6	1.243	0.556	0.013	0.0719	0.00078	0.10368	447.3	8.9	447.5	4.7	439	56	447.5	4.7	0.0447127
W3_140	106.8	0.931	11.89	0.13	0.4904	0.0037	0.51614	2595	10	2572	16	2612	16	2612	16	1.53139
Sample: W4				Isotopic ratios								Isotopic ages (Ma)
Grain #	[U] ppm	U/Th	207/235	2σ error	206/238	2σ error	RHO	207/235	2σ error	206/238	2σ error	207/206	2σ error	Best age	2σ error	% Discordance*	Rim/Core
W4_1	86.4	1.654	1.715	0.039	0.1625	0.0018	0.21524	1011	14	970.1	9.8	1090	46	1090	46	11
W4_2	162	1.384	1.735	0.029	0.1713	0.002	0.26579	1019	11	1019	11	1022	34	1022	34	0.293542
W4_3	123.7	3.099	1.62	0.026	0.1621	0.0016	0.36876	977	10	968.1	8.7	1001	32	1001	32	3.28671
W4_4	110	2.7	2.369	0.044	0.2143	0.0028	0.2835	1232	13	1251	15	1212	35	1212	35	3.21782
W4_5	167.9	2.65	1.807	0.027	0.177	0.0018	0.23474	1046.7	9.8	1050.3	9.7	1052	32	1052	32	0.161597
W4_6	214	3.41	2.498	0.041	0.2133	0.0026	0.49165	1269	12	1246	14	1325	27	1325	27	5.96226
W4_7	174	1.285	5.189	0.052	0.3304	0.0028	0.61307	1850.4	8.4	1840	13	1873	16	1873	16	1.76188
W4_8	56.5	1.792	1.739	0.041	0.1672	0.0019	0.10725	1019	15	997	10	1068	52	1068	52	6.64794
W4_9	225	1.658	0.627	0.01	0.07924	0.00066	0.18845	494.3	6.5	491.6	4	513	38	491.6	4	0.546227
W4_10	233	3.41	1.735	0.02	0.1702	0.0013	0.47794	1020.7	7.5	1013.3	7.2	1054	22	1054	22	3.86148
W4_11	251	2.264	1.711	0.027	0.1656	0.0016	0.41315	1012	10	987.7	9.1	1071	30	1071	30	7.77778
W4_12	998	7.18	0.915	0.016	0.106	0.0012	0.69588	659.2	8.3	649.3	7.2	686	27	649.3	7.2	1.50182
W4_13	238	1.675	0.871	0.017	0.10155	0.00099	0.065624	634.9	9.1	623.4	5.8	661	46	623.4	5.8	1.81131
W4_14	347	3.689	4.483	0.042	0.3017	0.0026	0.54786	1726.8	7.8	1699	13	1754	15	1754	15	3.13569
W4_15	103.4	2.268	1.694	0.028	0.1669	0.0016	0.1507	1004	10	994.8	8.8	1003	37	1003	37	0.817547
W4_16	450	2.365	1.856	0.04	0.1705	0.0027	0.83464	1063	14	1014	15	1135	23	1135	23	10.6608
W4_17	137	1.943	2.386	0.043	0.2096	0.0024	0.44338	1235	13	1228	13	1225	33	1225	33	0.244898
W4_18	44.7	2.38	4.757	0.091	0.3169	0.0048	0.2679	1773	16	1773	24	1751	36	1751	36	1.25642
W4_19	38.9	3.66	1.554	0.046	0.1526	0.0024	0.2227	948	19	915	13	989	62	989	62	7.48231
W4_20	255	2.664	1.682	0.024	0.1613	0.0017	0.442	1000.3	9	963.8	9.6	1055	26	1055	26	8.64455
W4_21	319	0.83	3.107	0.028	0.2412	0.002	0.4492	1433.5	7.1	1393	10	1487	17	1487	17	6.32145
W4_22	348	15.9	1.67	0.029	0.1615	0.0022	0.47495	995	11	965	12	1054	33	1054	33	8.44402	Rim
W4_22	80.9	2.36	2.086	0.081	0.1905	0.0047	0.36947	1142	26	1124	26	1164	74	1164	74	3.43643	Core
W4_23	52.5	1.172	0.989	0.029	0.1107	0.0014	0.16924	694	15	676.4	8.3	730	63	676.4	8.3	2.53602
W4_24	178	1.347	3.443	0.048	0.2699	0.0029	0.55504	1512	11	1540	15	1475	21	1475	21	4.40678
W4_25	193.1	1.762	1.776	0.024	0.1736	0.0017	0.45612	1035.1	8.8	1031.6	9.4	1047	25	1047	25	1.47087
W4_26	137.3	1.216	1.282	0.02	0.1363	0.0013	0.24451	836.1	9	823.2	7.6	881	35	823.2	7.6	1.54288
W4_27	96.1	2.198	3.565	0.053	0.2714	0.0031	0.29586	1540	12	1547	16	1536	30	1536	30	0.716146
W4_28	234	1.396	2.679	0.03	0.2262	0.0019	0.28289	1321.3	8.4	1314.4	9.9	1335	24	1335	24	1.54307
W4_29	228	1.129	4.222	0.056	0.2818	0.0027	0.54689	1677	11	1600	14	1778	20	1778	20	10.0112
W4_30	129	1.609	1.687	0.025	0.1651	0.0016	0.35268	1004.2	9.1	984.7	9	1044	31	1044	31	5.68008
W4_31	203	2.83	0.892	0.018	0.1034	0.0016	0.26106	646.8	9.6	634	9.1	686	44	634	9.1	1.97897
W4_32	136.6	1.606	0.721	0.017	0.0848	0.0011	0.2281	549	10	524.8	6.4	636	54	524.8	6.4	4.40801
W4_33	35.24	1.292	3.895	0.099	0.284	0.0045	0.1956	1608	20	1610	23	1594	50	1594	50	1.00376
W4_34	558	2.713	1.699	0.02	0.1672	0.0017	0.50981	1007.2	7.4	996.3	9.6	1025	21	1025	21	2.8
W4_35	119.2	1.722	3.369	0.041	0.2567	0.0024	0.41347	1495.5	9.5	1474	13	1521	26	1521	26	3.09007
W4_36	389	15.1	0.913	0.024	0.108	0.0024	0.50968	657	13	661	14	650	52	661	14	0.608828
W4_37	343	0.845	0.654	0.014	0.0819	0.0012	0.43985	509.5	8.4	507.2	7	523	43	507.2	7	0.451423
W4_38	192	0.899	2.74	0.042	0.2269	0.0027	0.5284	1337	11	1318	14	1385	26	1385	26	4.83755
W4_39	235	1.569	1.875	0.033	0.1815	0.0022	0.23787	1070	11	1076	13	1076	30	1076	30	0
W4_40	90.8	1.834	1.671	0.034	0.1667	0.0016	0.29084	994	13	993.8	9.1	1019	39	1019	39	2.47301
W4_41	419	10.12	0.869	0.014	0.10204	0.00087	0.26717	634.1	7.3	626.2	5.1	688	30	626.2	5.1	1.24586
W4_42	189.9	2.105	2.196	0.033	0.2029	0.003	0.4133	1179	11	1190	16	1184	32	1184	32	0.506757
W4_43	158.7	1.62	2.618	0.029	0.223	0.0014	0.22533	1304.4	8.3	1297.3	7.6	1334	23	1334	23	2.75112
W4_44	95.9	2.238	2.322	0.039	0.2079	0.0022	0.20232	1216	12	1217	12	1230	35	1230	35	1.05691
W4_45	108.9	0.6722	0.733	0.017	0.08912	0.00088	0.10109	556	10	550.2	5.2	586	55	550.2	5.2	1.04317
W4_46	131.5	1.165	5.282	0.055	0.3343	0.0026	0.42061	1864.4	8.8	1859	12	1867	18	1867	18	0.428495
W4_47	740	7.09	1.653	0.05	0.1654	0.0034	0.49593	990	19	987	19	999	47	999	47	1.2012	Rim
W4_47	348	4.15	1.846	0.024	0.1784	0.0017	0.45104	1061.1	8.5	1058.1	9.1	1064	23	1064	23	0.554511	Core
W4_48	623	7.25	1.988	0.025	0.1879	0.0021	0.42799	1111.8	8.3	1110	12	1111	25	1111	25	0.090009
W4_49	598	5.72	1.757	0.046	0.1718	0.0045	0.64326	1028	17	1022	25	1050	44	1050	44	2.66667
W4_50	139	1.208	0.579	0.014	0.07318	0.0009	0.22317	462.4	8.9	455.2	5.4	477	50	455.2	5.4	1.55709
W4_51	134.3	1.98	1.769	0.026	0.1724	0.0013	0.2411	1032.2	9.7	1025.1	7.2	1037	31	1037	31	1.14754
W4_52	449	56	0.796	0.026	0.0963	0.0027	0.24444	594	15	592	16	601	81	592	16	0.3367	Rim
W4_52	157.2	1.097	1.072	0.021	0.1226	0.0014	0.24066	738	10	745.5	8.2	719	40	745.5	8.2	1.01626	Core
W4_53	226.1	2.653	0.703	0.014	0.08705	0.00066	0.23678	539.2	8.2	538	3.9	540	43	538	3.9	0.222552
W4_54	708	5.09	2.123	0.082	0.1893	0.006	0.72291	1154	27	1127	26	1238	56	1238	56	8.96607	Rim
W4_54	256	2.337	2.619	0.03	0.2225	0.0021	0.44917	1304.8	8.5	1295	11	1322	22	1322	22	2.04236	Core
W4_55	217.1	2.49	3.234	0.035	0.2547	0.0024	0.3639	1464	8.4	1462	12	1474	20	1474	20	0.814111
W4_56	37.3	-12.2	11.16	0.14	0.4816	0.0059	0.52796	2536	12	2532	26	2548	21	2548	21	0.627943
W4_57	873	3.642	2.06	0.018	0.1919	0.0012	0.55861	1135.5	5.7	1131.3	6.7	1154	15	1154	15	1.96707
W4_58	176	0.4735	0.785	0.014	0.0968	0.0014	0.48728	587.3	8	595.6	8.2	572	39	595.6	8.2	1.41325
W4_59	273.9	1.467	4.39	0.045	0.2969	0.0031	0.48472	1709.3	8.6	1675	16	1759	19	1759	19	4.77544
W4_60	1159	4.182	1.505	0.015	0.1539	0.0011	0.54379	931.7	6.2	922.8	6	968	19	968	19	4.66942
W4_61	449	1.372	4.059	0.039	0.2876	0.0027	0.65209	1644.9	7.8	1629	14	1668	15	1668	15	2.33813
W4_62	337	6.47	0.593	0.012	0.0759	0.0011	0.46142	471.5	7.4	471.5	6.4	450	39	471.5	6.4	0
W4_63	264	5.68	2.337	0.039	0.2098	0.0031	0.6548	1221	12	1227	16	1208	28	1208	28	1.57285
W4_64	353	0.748	5.571	0.073	0.3304	0.0039	0.73429	1911	11	1839	19	1979	16	1979	16	7.07428
W4_65	78.6	0.566	2.583	0.049	0.2169	0.0028	0.47478	1294	14	1265	15	1337	35	1337	35	5.38519
W4_66	40.6	1.431	1.58	0.046	0.1561	0.0019	0.15889	956	18	935	11	977	62	977	62	4.29887
W4_67	163	1.769	1.236	0.026	0.1333	0.0014	0.2014	817	11	806.3	8.2	824	44	806.3	8.2	1.30967
W4_68	140.4	0.882	4.038	0.056	0.2886	0.0031	0.40291	1641	12	1634	15	1648	26	1648	26	0.849515
W4_69	233	0.887	4.121	0.047	0.2882	0.0029	0.4217	1659.1	9	1632	15	1686	21	1686	21	3.20285
W4_70	427	2.825	1.663	0.017	0.1643	0.0014	0.54699	993.7	6.5	980.7	7.7	1024	19	1024	19	4.22852
W4_71	40.6	2.5	1.872	0.06	0.1717	0.0034	0.43451	1063	21	1020	19	1192	68	1192	68	14.4295
W4_72	44.2	1.234	3.418	0.091	0.2592	0.004	0.38891	1507	22	1485	21	1544	48	1544	48	3.82124
W4_73	118.8	0.646	2.622	0.044	0.223	0.0024	0.30366	1304	12	1297	13	1319	34	1319	34	1.66793
W4_74	709	1.674	4.547	0.057	0.3064	0.0038	0.52373	1738	10	1724	19	1763	23	1763	23	2.21214
W4_75	265.4	5.24	0.757	0.038	0.0916	0.0036	0.79062	568	22	564	21	588	69	564	21	0.704225	Rim
W4_75	155.4	2.3	1.635	0.075	0.1631	0.0037	0.5999	979	28	974	20	994	72	994	72	2.01207	Core
W4_76	141.1	0.946	2.38	0.034	0.2112	0.0021	0.26997	1235	10	1235	11	1249	29	1249	29	1.1209
W4_77	159	3.12	1.747	0.029	0.1728	0.0022	0.45963	1024	11	1027	12	1035	31	1035	31	0.772947
W4_78	24.6	0.969	0.802	0.058	0.0947	0.0031	0.35841	583	33	582	18	560	140	582	18	0.171527
W4_79	21.38	3.9	5.39	0.12	0.335	0.0048	0.42156	1879	20	1861	23	1915	40	1915	40	2.81984
W4_80	332	7.95	3.275	0.033	0.2583	0.0021	0.60893	1474.9	7.9	1481	11	1481	16	1481	16	0
W4_81	132	0.8056	2.154	0.033	0.1968	0.0019	0.39846	1164	10	1159	11	1193	29	1193	29	2.84996
W4_82	9.33	0.532	2.35	0.12	0.1963	0.005	0.26629	1213	39	1153	27	1300	110	1300	110	11.3077
W4_83	223.5	1.959	1.315	0.02	0.1364	0.0013	0.44873	851	8.8	824	7.3	942	27	824	7.3	3.17274
W4_84	88.4	0.917	0.98	0.026	0.1114	0.0013	0.12406	691	13	681	7.3	725	57	681	7.3	1.44718
W4_85	352	5.93	0.666	0.011	0.08344	0.00071	0.3515	517.7	6.9	516.6	4.2	517	35	516.6	4.2	0.212478
W4_86	344	1.65	0.62	0.017	0.0794	0.0015	0.30965	489	11	492.2	8.9	459	61	492.2	8.9	0.654397	Rim
W4_86	165.8	2.732	1.618	0.035	0.1626	0.0025	0.3492	976	13	971	14	976	41	976	41	0.512295	Core
W4_87	47.1	1.028	2.043	0.053	0.1935	0.0027	0.32639	1124	18	1142	15	1075	50	1075	50	6.23256
W4_88	99.1	1.023	4.638	0.086	0.3147	0.0047	0.58894	1753	15	1763	23	1723	28	1723	28	2.32153
W4_89	130	2.24	0.743	0.019	0.0896	0.0012	0.25766	563	11	554.2	7.1	553	55	554.2	7.1	1.56306
W4_90	573	1.739	1.44	0.023	0.1478	0.0019	0.59911	904.2	9.9	888	10	906	29	906	29	1.98675
W4_91	334	2.37	5.716	0.046	0.3277	0.0023	0.51355	1932.9	6.9	1827	11	2021	13	2021	13	9.59921
W4_92	103.7	1.342	0.861	0.028	0.1009	0.002	0.43335	631	16	620	11	633	68	620	11	1.74326
W4_93	53.8	0.926	4.924	0.098	0.3223	0.0046	0.47835	1802	17	1800	22	1768	35	1768	35	1.80995
W4_94	164.6	0.943	11.25	0.18	0.4484	0.0079	0.80758	2542	16	2385	35	2649	22	2649	22	9.96602
W4_95	375	2.355	1.719	0.019	0.1667	0.0015	0.51074	1015.5	7.1	994.5	8.2	1037	21	1037	21	4.09836
W4_96	350	5.79	1.83	0.028	0.1759	0.0023	0.56448	1055.5	9.7	1044	13	1055	26	1055	26	1.04265
W4_97	182	0.881	3.586	0.053	0.265	0.0029	0.35505	1544	12	1515	15	1570	25	1570	25	3.50318
W4_98	1025	34.4	0.781	0.025	0.0942	0.0033	0.61789	584	14	580	20	596	63	580	20	0.684932
W4_99	55	2.05	1.799	0.056	0.1581	0.0027	0.37314	1040	21	946	15	1216	57	1216	57	22.2039
W4_100	76	0.73	0.785	0.023	0.0926	0.0014	0.33816	585	13	570.5	8.1	615	62	570.5	8.1	2.47863
W4_101	166.7	0.971	0.583	0.016	0.0741	0.0013	0.42891	466	10	460.7	7.7	462	56	460.7	7.7	1.13734
W4_102	780	2.686	4.088	0.042	0.2894	0.0028	0.61149	1650.5	8.4	1638	14	1662	16	1662	16	1.44404
W4_103	59.1	0.707	0.415	0.02	0.0556	0.00099	0.052201	348	14	348.7	6	330	100	348.7	6	0.201149
W4_104	157.9	0.4383	0.398	0.012	0.05227	0.00063	0.20026	338.5	8.6	328.4	3.9	387	63	328.4	3.9	2.98375
W4_105	199	2.32	6.676	0.084	0.3715	0.0044	0.50878	2067	11	2035	21	2099	21	2099	21	3.04907
W4_106	488	2.427	0.855	0.015	0.1022	0.0014	0.48533	625.9	8.4	626.8	8.2	617	36	626.8	8.2	0.143793
W4_107	122.7	1.753	2.929	0.043	0.2396	0.0025	0.45612	1387	11	1384	13	1399	29	1399	29	1.07219
W4_108	533	11.93	1.305	0.047	0.1389	0.0045	0.78127	846	21	838	26	882	49	838	26	0.945626	Rim
W4_108	121	1.74	1.673	0.036	0.1671	0.0024	0.27991	998	14	996	13	1003	46	1003	46	0.697906	Core
W4_109	110	1.317	1.76	0.038	0.1733	0.0025	0.24718	1029	14	1030	14	1026	42	1026	42	0.389864
W4_110	180.8	2.473	1.616	0.048	0.1618	0.0036	0.37057	974	19	966	20	996	61	996	61	3.01205
W4_111	413	2.215	2.084	0.02	0.1928	0.0016	0.43818	1143.4	6.7	1136.1	8.7	1168	20	1168	20	2.73116
W4_112	122.8	2.314	1.843	0.035	0.1794	0.0022	0.40674	1058	13	1063	12	1053	35	1053	35	0.949668
W4_113	492	11.1	0.706	0.01	0.08657	0.00096	0.5515	541.4	6.1	535.1	5.7	570	27	535.1	5.7	1.16365
W4_114	237	2.945	1.858	0.038	0.1793	0.0034	0.57752	1064	14	1062	18	1074	36	1074	36	1.11732
W4_115	224.3	2.296	1.951	0.025	0.1838	0.0015	0.28779	1097.4	8.7	1087.6	8.3	1110	27	1110	27	2.01802
W4_116	900	3.06	0.75	0.02	0.0919	0.0014	0.2237	568	12	567	8.3	568	60	567	8.3	0.176056
W4_117	319	3.497	0.377	0.012	0.05127	0.0008	0.28674	324.4	9	322.3	4.9	325	69	322.3	4.9	0.647349
W4_118	1910	0.94	0.547	0.015	0.0701	0.0016	0.74599	442.6	9.6	436.8	9.7	480	36	436.8	9.7	1.31044
W4_119	393	1.102	0.758	0.012	0.0917	0.001	0.61843	572.1	6.9	565.2	6	586	31	565.2	6	1.20608
W4_120	266	4.33	6.298	0.073	0.3635	0.0033	0.5053	2018	11	1998	15	2037	16	2037	16	1.91458
W4_121	192	3.68	0.825	0.019	0.0974	0.0013	0.36688	609	10	599.2	7.4	647	43	599.2	7.4	1.6092
W4_122	98.9	1.172	3.297	0.061	0.2471	0.003	0.50119	1479	14	1423	15	1561	29	1561	29	8.84049
W4_123	496	2.24	0.4039	0.0077	0.05351	0.00048	0.11279	343.9	5.6	336	2.9	393	45	336	2.9	2.29718
W4_124	376	1.274	0.3774	0.0067	0.05163	0.00048	0.35033	325.3	5.1	324.5	3	325	40	324.5	3	0.245927
W4_125	544	1.73	11.32	0.13	0.4708	0.0045	0.77888	2548	11	2486	20	2599	12	2599	12	4.34783
W4_126	77.5	0.836	0.759	0.025	0.0914	0.0012	0.099766	570	15	563.9	7.2	574	75	563.9	7.2	1.07018
W4_127	481	1.28	5.398	0.054	0.3193	0.0025	0.76388	1884.1	8.8	1786	12	1995	12	1995	12	10.4762
W4_128	131	1.573	2.696	0.053	0.2237	0.0034	0.621	1323	15	1301	18	1362	31	1362	31	4.47871
W4_129	109.6	0.993	6.17	0.22	0.3406	0.0045	0.48151	1994	30	1888	22	2099	51	2099	51	10.0524
W4_130	101.7	1.471	3.038	0.057	0.2436	0.0036	0.14606	1415	14	1405	19	1432	40	1432	40	1.88547	Rim
W4_130	47.1	1.604	3.54	0.11	0.2752	0.0055	0.24088	1531	25	1566	28	1480	65	1480	65	5.81081	Core
W4_131	353	3.51	1.707	0.031	0.1688	0.002	0.46412	1010	11	1005	11	1029	32	1029	32	2.33236
W4_132	237	0.3763	0.714	0.015	0.0876	0.0011	0.33702	545.7	9	541.4	6.5	551	42	541.4	6.5	0.787979
W4_133	303.4	26	0.785	0.013	0.0952	0.0012	0.37595	587.3	7.5	586	6.8	596	36	586	6.8	0.221352
W4_134	112.9	1.695	0.763	0.018	0.0925	0.0012	0.23183	575	11	570.2	7.3	607	51	570.2	7.3	0.834783
[truncated: 484 more rows]
